# Supplementary material for: Influence of Single Nucleotide Polymorphisms of ELOVL on Biomarkers of Metabolic Alterations in the Mexican Population
Source: PubMed Central journal article supplement (PMC7694210; doi:10.3390/nu12113389), 2020-11-04
Supplement: nutrients-12-03389-s001.pdf [file nutrients-12-03389-s001.pdf]

**Table 1.** Allele and genotype frequencies for all SNP markers.

| Gene           | SNP           | Genotype | Genotype Frequency (%) | Allele   | Allele Frequency (%) |
|----------------|---------------|----------|------------------------|----------|----------------------|
| ELOVL2         | rs8523        | AA       | 56.54                  | Allele A | 75.00                |
|                |               | AG       | 36.91                  | Allele G | 25.00                |
|                |               | GG       | 6.54                   |          |                      |
|                | rs3734396     | AA       | 87.79                  | Allele A | 93.48                |
|                |               | AG       | 11.37                  | Allele G | 6.52                 |
|                |               | GG       | 0.84                   |          |                      |
|                | rs17606561    | GG       | 63.93                  | Allele G | 80.00                |
|                |               | GA       | 32.21                  | Allele A | 20.00                |
|                |               | AA       | 3.86                   |          |                      |
|                | rs3734398     | GG       | 53.09                  | Allele G | 72.50                |
|                |               | GA       | 38.90                  | Allele A | 27.50                |
|                |               | AA       | 8.01                   |          |                      |
|                | GSA-rs2281591 | AA       | 60.34                  | Allele A | 77.60                |
|                |               | AG       | 34.62                  | Allele G | 22.40                |
|                |               | GG       | 5.04                   |          |                      |
|                | rs2236212     | GG       | 43.91                  | Allele G | 66.10                |
|                |               | GC       | 44.41                  | Allele C | 33.90                |
|                |               | CC       | 11.69                  |          |                      |
|                | rs3798713     | GG       | 44.39                  | Allele G | 66.33                |
|                |               | GC       | 43.89                  | Allele C | 33.70                |
|                |               | CC       | 11.73                  |          |                      |
|                | GSA-rs7765206 | CC       | 94.82                  | Allele C | 97.25                |
|                |               | CA       | 4.84                   | Allele A | 2.80                 |
|                |               | AA       | 0.33                   |          |                      |
|                | rs9295757     | CC       | 63.09                  | Allele C | 79.53                |
|                |               | CA       | 32.89                  | Allele A | 20.50                |
|                |               | AA       | 4.03                   |          |                      |
|                | rs3798721     | AA       | 58.82                  | Allele A | 77.00                |
|                |               | AC       | 36.30                  | Allele C | 23.00                |
|                |               | CC       | 4.87                   |          |                      |
| GSA-rs16870899 | AA            | 95.66    | Allele A               | 97.75    |                      |
|                | AG            | 4.17     | Allele G               | 2.30     |                      |
|                | GG            | 0.17     |                        |          |                      |
| rs3798722      | AA            | 55.63    | Allele A               | 74.70    |                      |
|                | AG            | 6.22     | Allele G               | 25.29    |                      |
|                | GG            | 38.15    |                        |          |                      |
| rs9393903      | GG            | 63.59    | Allele G               | 79.95    |                      |
|                | GA            | 32.72    | Allele A               | 20.05    |                      |
|                | AA            | 3.69     |                        |          |                      |
| rs4532436      | GG            | 55.91    | Allele G               | 74.58    |                      |
|                | CG            | 37.33    | Allele C               | 25.42    |                      |
|                | CC            | 6.76     |                        |          |                      |

|               |                 |       |          |          |       |
|---------------|-----------------|-------|----------|----------|-------|
|               |                 | GG    | 86.15    | Allele G | 92.91 |
|               | rs12195587      | AG    | 13.51    | Allele A | 7.10  |
|               |                 | AA    | 0.34     |          |       |
| <b>ELOVL3</b> |                 | AA    | 23.79    | Allele G | 51.76 |
|               | rs10748816      | GA    | 48.91    | Allele A | 48.24 |
|               |                 | GG    | 27.30    |          |       |
|               |                 | GG    | 97.83    | Allele G | 98.92 |
|               | GSA-rs36103207  | GA    | 2.17     | Allele A | 1.09  |
|               |                 | AA    | -        |          |       |
| <b>ELOVL4</b> |                 | AA    | 68.90    | Allele A | 82.78 |
|               | rs3812153       | AG    | 27.76    | Allele G | 17.22 |
|               |                 | GG    | 3.34     |          |       |
|               |                 | GG    | 96.33    | Allele G | 98.16 |
|               | GSA-rs117891930 | GA    | 3.67     | Allele A | 1.84  |
|               |                 | AA    | -        |          |       |
|               |                 | AA    | 93.82    | Allele A | 96.83 |
|               | GSA-rs80246554  | AG    | 6.01     | Allele G | 3.17  |
|               |                 | GG    | 0.17     |          |       |
|               |                 | GG    | 84.27    | Allele G | 91.70 |
|               | rs12196014      | GA    | 14.86    | Allele A | 8.30  |
|               |                 | AA    | 0.87     |          |       |
|               |                 | GG    | 68.73    | Allele G | 82.69 |
|               | rs9448863       | GA    | 27.93    | Allele A | 17.31 |
|               |                 | AA    | 3.34     |          |       |
|               |                 | AA    | 96.82    | Allele A | 98.41 |
|               | GSA-rs16891339  | AG    | 3.18     | Allele G | 1.59  |
|               |                 | GG    | -        |          |       |
| <b>ELOVL5</b> |                 | CC    | 97.83    | Allele C | 98.92 |
|               | GSA-rs41273878  | CA    | 2.17     | Allele A | 1.09  |
|               |                 | AA    | -        |          |       |
|               |                 | GG    | 98.83    | Allele G | 99.33 |
|               | GSA-rs72938776  | GA    | 1.00     | Allele A | 0.67  |
|               |                 | AA    | 0.17     |          |       |
|               |                 | AA    | 96.99    | Allele A | 98.50 |
|               | GSA-rs36054518  | AG    | 3.01     | Allele G | 1.51  |
|               |                 | GG    | -        |          |       |
|               |                 | AA    | 98.49    | Allele A | 99.25 |
|               | GSA-rs72940713  | AG    | 1.51     | Allele G | 0.75  |
|               |                 | GG    | -        |          |       |
|               |                 | AA    | 97.82    | Allele A | 98.91 |
|               | GSA-rs114271869 | AC    | 2.18     | Allele C | 1.09  |
|               |                 | CC    | -        |          |       |
|               | GG              | 28.52 | Allele G | 51.03    |       |
| rs 2073040    | AG              | 45.02 | Allele A | 48.97    |       |
|               | AA              | 26.46 |          |          |       |
|               | CC              | 72.05 | Allele C | 84.46    |       |
| rs 9370194    | CT              | 24.83 | Allele T | 15.54    |       |
|               | TT              | 3.13  |          |          |       |
| <b>ELOVL6</b> | rs11098065      | GG    | 57.62    | Allele G | 75.63 |

|                |    |       |          |       |
|----------------|----|-------|----------|-------|
|                | GA | 36.01 | Allele A | 24.37 |
|                | AA | 6.37  |          |       |
| rs17041284     | AA | 96.66 | Allele A | 98.33 |
|                | AG | 3.34  | Allele G | 1.67  |
|                | GG | -     |          |       |
| rs7662161      | AA | 59.13 | Allele A | 76.05 |
|                | AG | 33.84 | Allele G | 23.95 |
|                | GG | 7.04  |          |       |
| GSA-rs77958351 | GG | 97.16 | Allele G | 98.58 |
|                | GA | 2.84  | Allele A | 1.42  |
|                | AA | -     |          |       |
| rs59634436     | AA | 89.08 | Allele A | 94.37 |
|                | AC | 10.59 | Allele C | 5.63  |
|                | CC | 0.34  |          |       |
| GSA-rs78160528 | GG | 96.99 | Allele G | 98.41 |
|                | GA | 2.84  | Allele A | 1.59  |
|                | AA | 0.17  |          |       |
| rs16997129     | AA | 30.49 | Allele A | 55.70 |
|                | AG | 50.42 | Allele G | 44.31 |
|                | GG | 19.10 |          |       |
| GSA-rs3813827  | GG | 97.33 | Allele G | 98.66 |
|                | GA | 2.67  | Allele A | 1.34  |
|                | AA | -     |          |       |
| rs11737840     | GG | 77.72 | Allele G | 88.61 |
|                | GA | 21.78 | Allele A | 11.39 |
|                | AA | 0.50  |          |       |
| rs10033691     | AA | 86.48 | Allele A | 92.99 |
|                | AG | 13.02 | Allele G | 7.01  |
|                | GG | 0.50  |          |       |
| GSA-rs2005701  | AA | 34.29 | Allele A | 57.48 |
|                | AG | 46.39 | Allele G | 42.52 |
|                | GG | 19.33 |          |       |
| GSA-rs76145164 | GG | 96.48 | Allele G | 98.16 |
|                | GA | 3.35  | Allele A | 1.84  |
|                | AA | 0.17  |          |       |
| GSA-rs76338299 | CC | 90.80 | Allele C | 95.23 |
|                | CA | 8.86  | Allele A | 4.77  |
|                | AA | 0.33  |          |       |
| rs6533491      | GG | 48.16 | Allele G | 69.90 |
|                | GA | 43.48 | Allele A | 30.10 |
|                | AA | 8.36  |          |       |
| rs11937052     | AA | 86.14 | Allele A | 93.24 |
|                | AG | 13.52 | Allele G | 6.76  |
|                | GG | 0.33  |          |       |
| rs11098070     | GG | 26.01 | Allele G | 53.10 |
|                | GA | 54.19 | Allele A | 46.90 |
|                | AA | 19.80 |          |       |
| rs80343897     | AA | 59.30 | Allele A | 77.05 |

|                 |    |       |          |       |
|-----------------|----|-------|----------|-------|
|                 | AG | 35.51 | Allele G | 22.95 |
|                 | GG | 5.19  |          |       |
| GSA-rs114422025 | AA | 97.83 | Allele A | 98.80 |
|                 | AG | 2.00  | Allele G | 1.20  |
|                 | GG | 0.17  |          |       |
| rs6533495       | GG | 29.82 | Allele G | 55.19 |
|                 | GA | 50.75 | Allele A | 44.81 |
|                 | AA | 19.43 |          |       |
| rs28722886      | GG | 56.54 | Allele G | 76.32 |
|                 | GA | 39.56 | Allele A | 23.68 |
|                 | AA | 3.90  |          |       |
| rs6533497       | GG | 82.24 | Allele G | 90.20 |
|                 | GA | 15.91 | Allele A | 9.80  |
|                 | AA | 1.84  |          |       |
| GSA-rs77504516  | AA | 93.97 | Allele A | 96.99 |
|                 | AG | 6.03  | Allele G | 3.02  |
|                 | GG | -     |          |       |
| rs6815102       | AA | 41.95 | Allele A | 65.10 |
|                 | AG | 46.31 | Allele G | 34.90 |
|                 | GG | 11.74 |          |       |
| rs4326075       | AA | 59.97 | Allele A | 77.22 |
|                 | AC | 34.51 | Allele C | 22.78 |
|                 | CC | 5.53  |          |       |
| GSA-rs116418972 | AA | 98.16 | Allele A | 99.08 |
|                 | AG | 1.84  | Allele G | 0.92  |
|                 | GG | -     |          |       |
| rs11729740      | GG | 88.81 | Allele G | 94.32 |
|                 | GA | 11.02 | Allele A | 5.68  |
|                 | AA | 0.17  |          |       |
| rs2035415       | GG | 27.09 | Allele G | 53.43 |
|                 | GA | 52.68 | Allele A | 46.57 |
|                 | AA | 20.23 |          |       |
| GSA-rs17041402  | AA | 97.16 | Allele A | 98.58 |
|                 | AC | 2.84  | Allele C | 1.42  |
|                 | CC | -     |          |       |
| rs59111930      | AA | 47.49 | Allele A | 69.06 |
|                 | AG | 43.14 | Allele G | 30.94 |
|                 | GG | 9.36  |          |       |
| rs74874270      | AA | 94.99 | Allele A | 97.33 |
|                 | AG | 4.67  | Allele G | 2.67  |
|                 | GG | 0.33  |          |       |
| rs1384331       | AA | 34.67 | Allele A | 59.72 |
|                 | AC | 50.08 | Allele C | 40.29 |
|                 | CC | 15.24 |          |       |
| GSA-rs72679246  | AA | 97.59 | Allele A | 98.80 |
|                 | CA | 2.41  | Allele C | 1.20  |
|                 | CC | -     |          |       |
| rs78563565      | AA | 95.66 | Allele A | 97.83 |

|                 |    |       |          |       |
|-----------------|----|-------|----------|-------|
|                 | AG | 4.34  | Allele G | 2.17  |
|                 | GG | -     |          |       |
| rs6533498       | CC | 47.49 | Allele C | 69.15 |
|                 | CA | 9.20  | Allele A | 30.85 |
|                 | AA | 43.31 |          |       |
| rs 9997926      | CC | 91.36 | Allele C | 95.68 |
|                 | CT | 8.64  | Allele T | 4.32  |
|                 | TT | -     |          |       |
| rs 6824447      | GG | 43.47 | Allele G | 64.61 |
|                 | AG | 42.27 | Allele A | 35.40 |
|                 | AA | 14.26 |          |       |
| rs 17041272     | CC | 83.61 | Allele C | 91.30 |
|                 | CG | 15.37 | Allele G | 8.70  |
|                 | GG | 1.01  |          |       |
| GSA-rs75621404  | GG | 97.66 | Allele G | 98.83 |
|                 | GA | 2.34  | Allele A | 1.17  |
|                 | AA | -     |          |       |
| GSA-rs1563517   | CC | 69.35 | Allele C | 83.50 |
|                 | CA | 28.31 | Allele A | 16.50 |
|                 | AA | 2.35  |          |       |
| GSA-rs12188996  | AA | 98.49 | Allele A | 99.24 |
|                 | AC | 1.51  | Allele C | 0.76  |
|                 | CC | -     |          |       |
| GSA-rs60258111  | GG | 98.48 | Allele G | 99.24 |
|                 | GA | 1.52  | Allele A | 0.76  |
|                 | AA | -     |          |       |
| GSA-rs16878426  | AA | 98.16 | Allele A | 99.08 |
|                 | AG | 1.84  | Allele G | 0.92  |
|                 | GG | -     |          |       |
| rs6872863       | GG | 35.01 | Allele G | 58.88 |
|                 | GA | 47.74 | Allele A | 41.12 |
|                 | AA | 17.25 |          |       |
| GSA-rs76641655  | AA | 96.99 | Allele A | 98.50 |
|                 | AC | 3.01  | Allele C | 1.50  |
|                 | CC | -     |          |       |
| GSA-rs114011218 | AA | 97.83 | Allele A | 98.91 |
|                 | AG | 2.17  | Allele G | 1.09  |
|                 | GG | -     |          |       |
| GSA-rs115159664 | AA | 96.49 | Allele A | 98.16 |
|                 | AG | 3.34  | Allele G | 1.84  |
|                 | GG | 0.17  |          |       |
| rs4700398       | GG | 51.93 | Allele G | 71.26 |
|                 | GA | 38.66 | Allele A | 28.74 |
|                 | AA | 9.41  |          |       |

ELOVL7

A: Adenine; T: Thymine; G: Guanine; C: Cytosine.

**Table 2.** Association of SNPs with clinical markers of chronic non-communicable diseases.

| ELOVL2          |           |           |                 |       |           |                 |           |        |                 |           |              |       |
|-----------------|-----------|-----------|-----------------|-------|-----------|-----------------|-----------|--------|-----------------|-----------|--------------|-------|
| rs8523          |           |           |                 |       |           |                 |           |        |                 |           |              |       |
| Clinical marker | Total     |           |                 | Men   |           |                 | Women     |        |                 |           |              |       |
|                 | OR        | 95% CI    | <i>p</i> -value | OR    | 95% CI    | <i>p</i> -value | OR        | 95% CI | <i>p</i> -value |           |              |       |
| H-BMI           | 1.29<br>0 | 0.91<br>2 | 1.825           | 0.151 | 1.24<br>0 | 0.75<br>4       | 2.03<br>7 | 0.398  | 1.37<br>6       | 0.84<br>4 | <b>2.245</b> | 0.202 |
| H- Waist        | 1.33<br>8 | 0.94<br>3 | 1.899           | 0.103 | 1.40<br>9 | 0.82<br>0       | 2.42<br>1 | 0.215  | 1.22<br>2       | 0.76<br>8 | 1.947        | 0.399 |
| H-WHI           | 0.92<br>0 | 0.66<br>2 | 1.278           | 0.620 | 1.10<br>4 | 0.68<br>3       | 1.78<br>3 | 0.688  | 0.88<br>3       | 0.53<br>5 | 1.458        | 0.628 |
| H-WHR           | 1.16<br>1 | 0.83<br>5 | 1.613           | 0.376 | 1.14<br>0 | 0.70<br>7       | 1.84<br>0 | 0.592  | 1.17<br>9       | 0.74<br>7 | 1.859        | 0.481 |
| H-%BF           | 0.98<br>9 | 0.70<br>9 | 1.378           | 0.946 | 1.15<br>2 | 0.71<br>0       | 1.87<br>0 | 0.569  | 0.88<br>9       | 0.56<br>1 | 1.410        | 0.619 |
| H-Insulin       | 2.04<br>8 | 1.23<br>8 | 3.388           | 0.005 | 2.30<br>5 | 1.17<br>2       | 4.53<br>2 | 0.014  | 1.87<br>4       | 0.86<br>9 | 4.041        | 0.106 |
| H-Glucose       | 1.48<br>1 | 0.56<br>3 | 3.892           | 0.424 | 1.88<br>1 | 0.49<br>4       | 7.15<br>7 | 0.349  | 1.16<br>5       | 0.28<br>6 | 4.747        | 0.831 |
| H-HOMA          | 1.84<br>7 | 1.13<br>2 | 3.013           | 0.013 | 2.09<br>9 | 1.09<br>4       | 4.02<br>7 | 0.024  | 1.71<br>9       | 0.80<br>9 | 3.654        | 0.157 |
| H-Cholesterol   | 2.62<br>8 | 1.40<br>0 | 4.935           | 0.002 | 3.15<br>4 | 1.40<br>8       | 7.06<br>1 | 0.004  | 2.22<br>2       | 0.80<br>0 | 6.169        | 0.118 |
| H-Triglycerides | 1.03<br>7 | 0.69<br>3 | 1.552           | 0.861 | 1.28<br>9 | 0.75<br>0       | 2.21<br>6 | 0.359  | 0.84<br>8       | 0.45<br>8 | 1.571        | 0.602 |
| L-HDL           | 0.91<br>5 | 0.65<br>2 | 1.283           | 0.606 | 0.80<br>9 | 0.46<br>5       | 1.40<br>7 | 0.454  | 0.89<br>2       | 0.57<br>0 | 1.398        | 0.620 |
| H-LDL           | 1.42<br>4 | 0.65<br>7 | 3.085           | 0.369 | 2.21<br>0 | 0.81<br>6       | 5.98<br>6 | 0.112  | 0.76<br>7       | 0.21<br>2 | 2.775        | 0.687 |
| rs3734396       |           |           |                 |       |           |                 |           |        |                 |           |              |       |
| Clinical marker | Total     |           |                 | Men   |           |                 | Women     |        |                 |           |              |       |
|                 | OR        | 95% CI    | <i>p</i> -value | OR    | 95% CI    | <i>p</i> -value | OR        | 95% CI | <i>p</i> -value |           |              |       |
| H-BMI           | 0.74<br>7 | 0.43<br>2 | 1.291           | 0.296 | 0.59<br>7 | 0.27<br>8       | 1.28<br>2 | 0.183  | 0.94<br>1       | 0.42<br>9 | 2.065        | 0.880 |
| H- Waist        | 0.71<br>5 | 0.40<br>7 | 1.257           | 0.243 | 0.75<br>4 | 0.32<br>9       | 1.72<br>5 | 0.504  | 0.72<br>6       | 0.33<br>2 | 1.586        | 0.422 |
| H-WHI           | 0.84<br>7 | 0.51<br>1 | 1.402           | 0.518 | 0.82<br>1 | 0.41<br>6       | 1.61<br>8 | 0.569  | 0.66<br>8       | 0.27<br>9 | 1.602        | 0.365 |
| H-WHR           | 0.76<br>9 | 0.46<br>3 | 1.278           | 0.311 | 0.61<br>8 | 0.30<br>3       | 1.25<br>9 | 0.184  | 0.97<br>6       | 0.47<br>0 | 2.027        | 0.949 |
| H-%BF           | 0.85<br>6 | 0.51<br>8 | 1.413           | 0.543 | 0.65<br>5 | 0.32<br>6       | 1.31<br>7 | 0.234  | 1.11<br>4       | 0.54<br>0 | 2.299        | 0.772 |
| H-Insulin       | 1.10<br>7 | 0.52<br>8 | 2.320           | 0.789 | 0.59<br>4 | 0.19<br>3       | 1.82<br>9 | 0.362  | 2.07<br>6       | 0.76<br>1 | 5.666        | 0.148 |
| H-HOMA          | 1.17<br>0 | 0.56<br>8 | 2.411           | 0.671 | 0.88<br>0 | 0.31<br>8       | 2.43<br>1 | 0.806  | 1.60<br>7       | 0.57<br>1 | 4.521        | 0.366 |
| H-Cholesterol   | 1.28<br>6 | 0.55<br>3 | 2.988           | 0.559 | 1.01<br>9 | 0.33<br>5       | 3.10<br>6 | 0.873  | 1.69<br>0       | 0.46<br>3 | 6.167        | 0.423 |
| H-Triglycerides | 0.74<br>2 | 0.38<br>6 | 1.427           | 0.371 | 0.88<br>1 | 0.39<br>7       | 1.95<br>6 | 0.756  | 0.47<br>4       | 0.13<br>9 | 1.614        | 0.224 |

|                        |              |               |       |                |            |               |           |                |              |               |            |                |
|------------------------|--------------|---------------|-------|----------------|------------|---------------|-----------|----------------|--------------|---------------|------------|----------------|
| L-HDL                  | 0.98<br>3    | 0.59<br>0     | 1.640 | 0.949          | 1.23<br>1  | 0.57<br>8     | 2.62<br>0 | 0.591          | 0.90<br>6    | 0.44<br>2     | 1.855      | 0.787          |
| H-LDL                  | 2.14<br>9    | 0.83<br>8     | 5.515 | 0.104          | 1.39<br>3  | 0.38<br>1     | 5.08<br>7 | 0.615          | 3.73<br>3    | 0.91<br>8     | 15.17<br>7 | 0.050          |
| <b>rs17606561</b>      |              |               |       |                |            |               |           |                |              |               |            |                |
|                        | <b>Total</b> |               |       |                | <b>Men</b> |               |           |                | <b>Women</b> |               |            |                |
| <b>Clinical marker</b> | <b>OR</b>    | <b>95% CI</b> |       | <b>p-value</b> | <b>OR</b>  | <b>95% CI</b> |           | <b>p-value</b> | <b>OR</b>    | <b>95% CI</b> |            | <b>p-value</b> |
| H-BMI                  | 0.82<br>6    | 0.57<br>5     | 1.186 | 0.301          | 0.84<br>1  | 0.49<br>8     | 1.41<br>7 | 0.516          | 0.82<br>6    | 0.49<br>9     | 1.367      | 0.458          |
| H- Waist               | 0.69<br>2    | 0.47<br>7     | 1.004 | 0.052          | 0.65<br>0  | 0.35<br>9     | 1.17<br>9 | 0.155          | 0.67<br>9    | 0.41<br>8     | 1.104      | 0.188          |
| H-WHI                  | 1.13<br>6    | 0.81<br>0     | 1.594 | 0.461          | 1.42<br>4  | 0.86<br>0     | 2.36<br>0 | 0.170          | 1.06<br>6    | 0.64<br>0     | 1.777      | 0.806          |
| H-WHR                  | 0.84<br>9    | 0.60<br>4     | 1.194 | 0.347          | 0.90<br>4  | 0.54<br>9     | 1.48<br>6 | 0.691          | 0.80<br>4    | 0.50<br>3     | 1.284      | 0.362          |
| H-%BF                  | 0.95<br>4    | 0.67<br>8     | 1.343 | 0.790          | 0.88<br>5  | 0.53<br>6     | 1.46<br>0 | 0.633          | 1.04<br>7    | 0.65<br>5     | 1.675      | 0.848          |
| H-Insulin              | 0.60<br>2    | 0.34<br>6     | 1.049 | 0.071          | 0.29<br>1  | 0.12<br>2     | 0.69<br>3 | 0.004          | 1.29<br>8    | 0.60<br>0     | 2.808      | 0.509          |
| H-Glucose              | 0.37<br>1    | 0.10<br>5     | 1.306 | 0.109          | 0.23<br>9  | 0.03<br>0     | 1.94<br>3 | 0.148          | 0.52<br>7    | 0.10<br>5     | 2.655      | 0.432          |
| H-HOMA                 | 0.52<br>1    | 0.29<br>8     | 0.914 | 0.021          | 0.20<br>4  | 0.07<br>7     | 0.53<br>9 | 0.001          | 1.24<br>1    | 0.58<br>3     | 2.645      | 0.576          |
| H-Cholesterol          | 0.60<br>3    | 0.30<br>5     | 1.191 | 0.142          | 0.73<br>2  | 0.31<br>1     | 1.71<br>9 | 0.474          | 0.47<br>6    | 0.15<br>2     | 1.496      | 0.196          |
| H-Triglycerides        | 0.62<br>5    | 0.40<br>4     | 0.968 | 0.034          | 0.69<br>8  | 0.38<br>8     | 1.25<br>6 | 0.231          | 0.57<br>4    | 0.29<br>5     | 1.116      | 0.100          |
| L-HDL                  | 1.28<br>7    | 0.91<br>1     | 1.818 | 0.152          | 1.26<br>1  | 0.72<br>3     | 2.20<br>0 | 0.416          | 1.22<br>6    | 0.77<br>5     | 1.940      | 0.385          |
| H-LDL                  | 0.88<br>1    | 0.38<br>9     | 1.997 | 0.762          | 0.81<br>5  | 0.27<br>9     | 2.38<br>4 | 0.710          | 1.07<br>2    | 0.29<br>6     | 3.882      | 0.915          |
| <b>rs3734398</b>       |              |               |       |                |            |               |           |                |              |               |            |                |
|                        | <b>Total</b> |               |       |                | <b>Men</b> |               |           |                | <b>Women</b> |               |            |                |
| <b>Clinical marker</b> | <b>OR</b>    | <b>95% CI</b> |       | <b>p-value</b> | <b>OR</b>  | <b>95% CI</b> |           | <b>p-value</b> | <b>OR</b>    | <b>95% CI</b> |            | <b>p-value</b> |
| H-BMI                  | 1.44<br>1    | 1.02<br>0     | 2.036 | 0.038          | 1.33<br>2  | 0.81<br>5     | 2.17<br>5 | 0.253          | 1.58<br>3    | 0.97<br>0     | 2.583      | 0.065          |
| H- Waist               | 1.30<br>4    | 0.92<br>0     | 1.847 | 0.135          | 1.36<br>0  | 0.79<br>5     | 2.32<br>9 | 0.263          | 1.22<br>3    | 0.76<br>9     | 1.945      | 0.396          |
| H-WHI                  | 0.85<br>7    | 0.61<br>8     | 1.187 | 0.354          | 0.96<br>5  | 0.60<br>3     | 1.54<br>6 | 0.883          | 0.81<br>5    | 0.49<br>5     | 1.343      | 0.423          |
| H-WHR                  | 1.16<br>5    | 0.84<br>1     | 1.615 | 0.359          | 1.11<br>9  | 0.69<br>9     | 1.79<br>2 | 0.641          | 1.21<br>1    | 0.76<br>9     | 1.907      | 0.410          |
| H-%BF                  | 1.06<br>0    | 0.76<br>3     | 1.473 | 0.729          | 1.18<br>1  | 0.73<br>4     | 1.90<br>0 | 0.495          | 0.97<br>9    | 0.61<br>9     | 1.548      | 0.928          |
| H-Insulin              | 1.89<br>4    | 1.14<br>6     | 3.130 | 0.012          | 2.22<br>2  | 1.13<br>3     | 4.36<br>0 | 0.019          | 1.61<br>8    | 0.75<br>1     | 3.486      | 0.228          |
| H-Glucose              | 1.28<br>2    | 0.48<br>8     | 3.369 | 0.614          | 1.54<br>0  | 0.40<br>5     | 5.85<br>7 | 0.525          | 1.06<br>1    | 0.26<br>1     | 4.321      | 0.934          |
| H-HOMA                 | 1.78<br>0    | 1.08<br>8     | 2.912 | 0.020          | 2.08<br>0  | 1.07<br>9     | 4.00<br>9 | 0.027          | 1.54<br>1    | 0.72<br>5     | 3.274      | 0.260          |
| H-Cholesterol          | 2.34<br>1    | 1.25<br>1     | 4.378 | 0.006          | 3.01<br>0  | 1.32<br>0     | 6.86<br>4 | 0.006          | 1.71<br>7    | 0.64<br>8     | 4.553      | 0.274          |

|                        |              |               |       |                |            |               |       |                |              |               |       |                |
|------------------------|--------------|---------------|-------|----------------|------------|---------------|-------|----------------|--------------|---------------|-------|----------------|
| <b>H-Triglycerides</b> | 1.269        | 0.852         | 1.889 | 0.242          | 1.506      | 0.882         | 2.573 | 0.133          | 1.071        | 0.585         | 1.962 | 0.824          |
| <b>L-HDL</b>           | 0.934        | 0.669         | 1.306 | 0.692          | 0.894      | 0.522         | 1.530 | 0.683          | 0.906        | 0.580         | 1.415 | 0.664          |
| <b>H-LDL</b>           | 1.685        | 0.769         | 3.695 | 0.189          | 2.342      | 0.842         | 6.515 | 0.095          | 1.062        | 0.301         | 3.743 | 0.926          |
| <b>rs2281591</b>       |              |               |       |                |            |               |       |                |              |               |       |                |
|                        | <b>Total</b> |               |       |                | <b>Men</b> |               |       |                | <b>Women</b> |               |       |                |
| <b>Clinical marker</b> | <b>OR</b>    | <b>95% CI</b> |       | <b>p-value</b> | <b>OR</b>  | <b>95% CI</b> |       | <b>p-value</b> | <b>OR</b>    | <b>95% CI</b> |       | <b>p-value</b> |
| <b>H-BMI</b>           | 0.856        | 0.601         | 1.219 | 0.390          | 0.925      | 0.558         | 1.532 | 0.762          | 0.802        | 0.488         | 1.320 | 0.387          |
| <b>H- Waist</b>        | 0.641        | 0.445         | 0.924 | 0.017          | 0.650      | 0.367         | 1.153 | 0.140          | 0.610        | 0.377         | 0.988 | 0.044          |
| <b>H-WHI</b>           | 1.078        | 0.772         | 1.504 | 0.660          | 1.365      | 0.837         | 2.225 | 0.213          | 0.917        | 0.551         | 1.524 | 0.739          |
| <b>H-WHR</b>           | 0.833        | 0.596         | 1.164 | 0.286          | 1.001      | 0.617         | 1.623 | 0.998          | 0.704        | 0.443         | 1.121 | 0.140          |
| <b>H-%BF</b>           | 0.938        | 0.670         | 1.312 | 0.708          | 0.910      | 0.559         | 1.482 | 0.706          | 0.976        | 0.613         | 1.554 | 0.918          |
| <b>H-Insulin</b>       | 0.517        | 0.297         | 0.899 | 0.018          | 0.240      | 0.101         | 0.572 | 0.001          | 1.136        | 0.526         | 2.454 | 0.746          |
| <b>H-Glucose</b>       | 0.459        | 0.148         | 1.425 | 0.168          | 0.451      | 0.092         | 2.213 | 0.317          | 0.472        | 0.094         | 2.377 | 0.354          |
| <b>H-HOMA</b>          | 0.479        | 0.276         | 0.831 | 0.008          | 0.204      | 0.083         | 0.503 | 0.001          | 1.108        | 0.521         | 2.358 | 0.791          |
| <b>H-Cholesterol</b>   | 0.576        | 0.296         | 1.119 | 0.100          | 0.702      | 0.307         | 1.603 | 0.401          | 0.425        | 0.135         | 1.336 | 0.133          |
| <b>H-Triglycerides</b> | 0.767        | 0.506         | 1.164 | 0.213          | 0.912      | 0.523         | 1.589 | 0.746          | 0.632        | 0.332         | 1.202 | 0.160          |
| <b>L-HDL</b>           | 1.189        | 0.846         | 1.672 | 0.319          | 1.157      | 0.668         | 2.001 | 0.604          | 1.175        | 0.746         | 1.850 | 0.488          |
| <b>H-LDL</b>           | 1.048        | 0.478         | 2.300 | 0.907          | 0.874      | 0.314         | 2.435 | 0.797          | 1.459        | 0.414         | 5.148 | 0.556          |
| <b>rs2236212</b>       |              |               |       |                |            |               |       |                |              |               |       |                |
|                        | <b>Total</b> |               |       |                | <b>Men</b> |               |       |                | <b>Women</b> |               |       |                |
| <b>Clinical marker</b> | <b>OR</b>    | <b>95% CI</b> |       | <b>p-value</b> | <b>OR</b>  | <b>95% CI</b> |       | <b>p-value</b> | <b>OR</b>    | <b>95% CI</b> |       | <b>p-value</b> |
| <b>H-BMI</b>           | 1.204        | 0.849         | 1.707 | 0.297          | 0.986      | 0.604         | 1.611 | 0.956          | 1.492        | 0.904         | 2.463 | 0.117          |
| <b>H- Waist</b>        | 1.091        | 0.768         | 1.550 | 0.628          | 1.092      | 0.636         | 1.874 | 0.751          | 1.063        | 0.665         | 1.699 | 0.800          |
| <b>H-WHI</b>           | 0.790        | 0.569         | 1.096 | 0.158          | 0.850      | 0.531         | 1.363 | 0.502          | 0.748        | 0.454         | 1.235 | 0.257          |
| <b>H-WHR</b>           | 0.981        | 0.706         | 1.362 | 0.909          | 0.887      | 0.554         | 1.419 | 0.617          | 1.080        | 0.682         | 1.710 | 0.743          |
| <b>H-%BF</b>           | 0.947        | 0.680         | 1.318 | 0.747          | 0.903      | 0.562         | 1.451 | 0.675          | 1.009        | 0.635         | 1.605 | 0.969          |
| <b>H-Insulin</b>       | 1.922        | 1.135         | 3.254 | 0.014          | 2.198      | 1.088         | 4.441 | 0.026          | 1.688        | 0.755         | 3.774 | 0.201          |
| <b>H-Glucose</b>       | 0.877        | 0.334         | 2.306 | 0.791          | 1.029      | 0.271         | 3.915 | 0.966          | 0.741        | 0.182         | 3.020 | 0.676          |
| <b>H-HOMA</b>          | 1.995        | 1.184         | 3.361 | 0.009          | 2.415      | 1.200         | 4.859 | 0.012          | 1.643        | 0.744         | 3.626 | 0.217          |



|                        |              |               |       |                |            |               |           |                |              |               |            |                |
|------------------------|--------------|---------------|-------|----------------|------------|---------------|-----------|----------------|--------------|---------------|------------|----------------|
| H-Cholesterol          | 2.43<br>2    | 1.23<br>6     | 4.785 | 0.008          | 2.84<br>2  | 1.17<br>3     | 6.88<br>6 | 0.016          | 2.01<br>7    | 0.70<br>1     | 5.804      | 0.187          |
| H-Triglycerides        | 1.16<br>2    | 0.77<br>6     | 1.739 | 0.467          | 1.51<br>9  | 0.87<br>9     | 2.62<br>5 | 0.136          | 0.85<br>5    | 0.46<br>6     | 1.571      | 0.615          |
| L-HDL                  | 0.91<br>1    | 0.65<br>2     | 1.275 | 0.588          | 0.89<br>4  | 0.52<br>4     | 1.52<br>6 | 0.683          | 0.88<br>0    | 0.56<br>1     | 1.381      | 0.580          |
| H-LDL                  | 2.85<br>6    | 1.13<br>6     | 7.181 | 0.020          | 2.82<br>4  | 0.89<br>8     | 8.88<br>2 | 0.065          | 3.08<br>2    | 0.64<br>4     | 14.75<br>9 | 0.140          |
| <b>rs3798713</b>       |              |               |       |                |            |               |           |                |              |               |            |                |
|                        | <b>Total</b> |               |       |                | <b>Men</b> |               |           |                | <b>Women</b> |               |            |                |
| <b>Clinical marker</b> | <b>OR</b>    | <b>95% CI</b> |       | <b>p-value</b> | <b>OR</b>  | <b>95% CI</b> |           | <b>p-value</b> | <b>OR</b>    | <b>95% CI</b> |            | <b>p-value</b> |
| H-BMI                  | 1.16<br>5    | 0.82<br>2     | 1.650 | 0.391          | 0.94<br>5  | 0.57<br>8     | 1.54<br>4 | 0.821          | 1.45<br>4    | 0.88<br>3     | 2.394      | 0.141          |
| H- Waist               | 1.12<br>2    | 0.79<br>0     | 1.595 | 0.520          | 1.19<br>9  | 0.69<br>7     | 2.06<br>1 | 0.513          | 1.04<br>6    | 0.65<br>5     | 1.671      | 0.850          |
| H-WHI                  | 0.79<br>7    | 0.57<br>4     | 1.106 | 0.174          | 0.88<br>1  | 0.54<br>9     | 1.41<br>2 | 0.599          | 0.72<br>8    | 0.44<br>1     | 1.200      | 0.214          |
| H-WHR                  | 0.97<br>5    | 0.70<br>2     | 1.354 | 0.882          | 0.88<br>3  | 0.55<br>1     | 1.41<br>4 | 0.606          | 1.07<br>2    | 0.67<br>8     | 1.695      | 0.768          |
| H-%BF                  | 0.94<br>6    | 0.68<br>0     | 1.317 | 0.743          | 0.90<br>4  | 0.56<br>2     | 1.45<br>4 | 0.678          | 1.00<br>5    | 0.63<br>3     | 1.596      | 0.983          |
| H-Insulin              | 1.64<br>4    | 0.97<br>8     | 2.762 | 0.059          | 1.63<br>1  | 0.81<br>9     | 3.24<br>7 | 0.163          | 1.72<br>4    | 0.77<br>1     | 3.854      | 0.183          |
| H-Glucose              | 0.70<br>2    | 0.26<br>7     | 1.846 | 0.472          | 0.65<br>8  | 0.17<br>3     | 2.50<br>2 | 0.538          | 0.76<br>2    | 0.18<br>7     | 3.102      | 0.704          |
| H-HOMA                 | 1.76<br>5    | 1.05<br>8     | 2.944 | 0.028          | 1.88<br>8  | 0.95<br>9     | 3.71<br>5 | 0.064          | 1.69<br>4    | 0.76<br>8     | 3.739      | 0.189          |
| H-Cholesterol          | 2.48<br>5    | 1.26<br>3     | 4.888 | 0.007          | 2.88<br>5  | 1.19<br>1     | 6.99<br>0 | 0.015          | 2.07<br>4    | 0.72<br>1     | 5.966      | 0.169          |
| H-Triglycerides        | 1.12<br>1    | 0.74<br>9     | 1.678 | 0.579          | 1.38<br>6  | 0.80<br>3     | 2.39<br>3 | 0.242          | 0.88<br>2    | 0.48<br>1     | 1.620      | 0.688          |
| L-HDL                  | 0.92<br>7    | 0.66<br>3     | 1.298 | 0.661          | 0.94<br>7  | 0.55<br>3     | 1.62<br>1 | 0.842          | 0.87<br>7    | 0.55<br>9     | 1.375      | 0.569          |
| H-LDL                  | 2.91<br>5    | 1.15<br>9     | 7.330 | 0.018          | 2.86<br>4  | 0.91<br>0     | 9.00<br>7 | 0.062          | 3.16<br>7    | 0.66<br>1     | 15.16<br>2 | 0.130          |
| <b>rs7765206</b>       |              |               |       |                |            |               |           |                |              |               |            |                |
|                        | <b>Total</b> |               |       |                | <b>Men</b> |               |           |                | <b>Women</b> |               |            |                |
| <b>Clinical marker</b> | <b>OR</b>    | <b>95% CI</b> |       | <b>p-value</b> | <b>OR</b>  | <b>95% CI</b> |           | <b>p-value</b> | <b>OR</b>    | <b>95% CI</b> |            | <b>p-value</b> |
| H-BMI                  | 1.11<br>5    | 0.52<br>3     | 2.376 | 0.778          | 1.03<br>4  | 0.33<br>7     | 3.17<br>5 | 0.953          | 1.20<br>1    | 0.43<br>1     | 3.351      | 0.727          |
| H- Waist               | 0.52<br>0    | 0.21<br>0     | 1.291 | 0.153          | 0.22<br>3  | 0.02<br>9     | 1.73<br>6 | 0.119          | 0.70<br>6    | 0.24<br>2     | 2.058      | 0.523          |
| H-WHI                  | 0.54<br>0    | 0.24<br>4     | 1.195 | 0.124          | 0.53<br>0  | 0.17<br>9     | 1.56<br>8 | 0.246          | 0.53<br>7    | 0.15<br>0     | 1.917      | 0.333          |
| H-WHR                  | 0.83<br>0    | 0.39<br>5     | 1.743 | 0.623          | 0.99<br>4  | 0.33<br>6     | 2.94<br>2 | 0.991          | 0.71<br>1    | 0.25<br>6     | 1.976      | 0.513          |
| H-%BF                  | 0.90<br>5    | 0.43<br>3     | 1.890 | 0.790          | 0.91<br>2  | 0.31<br>1     | 2.67<br>4 | 0.868          | 0.90<br>4    | 0.32<br>8     | 2.496      | 0.847          |
| H-Insulin              | 0.22<br>6    | 0.03<br>0     | 1.718 | 0.117          | 0.76<br>0  | 0.70<br>2     | 0.82<br>3 | 0.141          | 0.50<br>3    | 0.06<br>3     | 4.009      | 0.511          |
| H-Glucose              | 0.97<br>0    | 0.95<br>6     | 0.984 | 0.329          | 0.96<br>7  | 0.94<br>6     | 0.98<br>8 | 0.493          | 0.97<br>3    | 0.95<br>4     | 0.992      | 0.492          |

|                        |              |               |       |                       |            |               |            |                       |              |               |            |                       |
|------------------------|--------------|---------------|-------|-----------------------|------------|---------------|------------|-----------------------|--------------|---------------|------------|-----------------------|
| <b>H-HOMA</b>          | 0.22<br>9    | 0.03<br>1     | 1.711 | 0.117                 | 0.81<br>5  | 0.76<br>7     | 0.86<br>5  | 0.101                 | 0.59<br>0    | 0.07<br>5     | 4.651      | 0.614                 |
| <b>H-Cholesterol</b>   | 0.37<br>8    | 0.05<br>0     | 2.837 | 0.327                 | 0.67<br>6  | 0.08<br>5     | 5.36<br>2  | 0.710                 | 0.93<br>9    | 0.91<br>2     | 0.967      | 0.295                 |
| <b>H-Triglycerides</b> | 1.93<br>9    | 0.88<br>8     | 4.233 | 0.092                 | 2.36<br>4  | 0.79<br>1     | 7.05<br>9  | 0.114                 | 1.65<br>9    | 0.51<br>8     | 5.313      | 0.391                 |
| <b>L-HDL</b>           | 1.29<br>9    | 0.62<br>3     | 2.705 | 0.485                 | 1.21<br>2  | 0.36<br>8     | 3.98<br>9  | 0.753                 | 1.32<br>5    | 0.49<br>7     | 3.529      | 0.574                 |
| <b>H-LDL</b>           | 1.49<br>8    | 0.33<br>8     | 6.633 | 0.593                 | 1.24<br>0  | 0.15<br>3     | 10.0<br>86 | 0.841                 | 1.97<br>9    | 0.23<br>6     | 16.59<br>6 | 0.523                 |
| <b>rs9295757</b>       |              |               |       |                       |            |               |            |                       |              |               |            |                       |
|                        | <b>Total</b> |               |       |                       | <b>Men</b> |               |            |                       | <b>Women</b> |               |            |                       |
| <b>Clinical marker</b> | <b>OR</b>    | <b>95% CI</b> |       | <b><i>p</i>-value</b> | <b>OR</b>  | <b>95% CI</b> |            | <b><i>p</i>-value</b> | <b>OR</b>    | <b>95% CI</b> |            | <b><i>p</i>-value</b> |
| <b>H-BMI</b>           | 0.90<br>6    | 0.63<br>3     | 1.297 | 0.591                 | 0.99<br>3  | 0.59<br>5     | 1.65<br>5  | 0.978                 | 0.84<br>0    | 0.50<br>7     | 1.391      | 0.499                 |
| <b>H-Waist</b>         | 0.74<br>0    | 0.51<br>2     | 1.070 | 0.109                 | 0.77<br>3  | 0.43<br>5     | 1.37<br>3  | 0.381                 | 0.68<br>8    | 0.42<br>3     | 1.119      | 0.132                 |
| <b>H-WHI</b>           | 1.23<br>5    | 0.88<br>2     | 1.730 | 0.219                 | 1.60<br>3  | 0.97<br>1     | 2.64<br>7  | 0.065                 | 1.08<br>7    | 0.65<br>2     | 1.814      | 0.750                 |
| <b>H-WHR</b>           | 0.93<br>6    | 0.66<br>7     | 1.312 | 0.701                 | 1.02<br>6  | 0.62<br>9     | 1.67<br>4  | 0.919                 | 0.86<br>1    | 0.53<br>9     | 1.375      | 0.533                 |
| <b>H-%BF</b>           | 1.01<br>1    | 0.72<br>0     | 1.421 | 0.948                 | 0.98<br>0  | 0.59<br>8     | 1.60<br>6  | 0.937                 | 1.06<br>0    | 0.66<br>2     | 1.697      | 0.809                 |
| <b>H-Insulin</b>       | 0.77<br>4    | 0.45<br>6     | 1.314 | 0.343                 | 0.50<br>1  | 0.23<br>6     | 1.06<br>2  | 0.069                 | 1.30<br>6    | 0.60<br>3     | 2.828      | 0.499                 |
| <b>H-Glucose</b>       | 0.51<br>7    | 0.16<br>6     | 1.606 | 0.247                 | 0.51<br>7  | 0.10<br>5     | 2.53<br>5  | 0.410                 | 0.52<br>4    | 0.10<br>4     | 2.641      | 0.428                 |
| <b>H-HOMA</b>          | 0.67<br>8    | 0.39<br>9     | 1.152 | 0.150                 | 0.40<br>3  | 0.18<br>4     | 0.88<br>1  | 0.020                 | 1.23<br>4    | 0.57<br>9     | 2.629      | 0.587                 |
| <b>H-Cholesterol</b>   | 0.56<br>2    | 0.28<br>5     | 1.107 | 0.092                 | 0.67<br>6  | 0.28<br>8     | 1.58<br>6  | 0.367                 | 0.43<br>7    | 0.14<br>0     | 1.361      | 0.144                 |
| <b>H-Triglycerides</b> | 0.69<br>2    | 0.45<br>1     | 1.062 | 0.091                 | 0.82<br>4  | 0.46<br>7     | 1.45<br>5  | 0.507                 | 0.57<br>0    | 0.29<br>3     | 1.109      | 0.096                 |
| <b>L-HDL</b>           | 1.22<br>9    | 0.87<br>1     | 1.734 | 0.241                 | 1.23<br>8  | 0.71<br>3     | 2.14<br>9  | 0.450                 | 1.17<br>5    | 0.74<br>2     | 1.859      | 0.494                 |
| <b>H-LDL</b>           | 0.84<br>8    | 0.37<br>4     | 1.922 | 0.694                 | 0.75<br>5  | 0.25<br>8     | 2.20<br>7  | 0.608                 | 1.06<br>7    | 0.29<br>5     | 3.861      | 0.922                 |
| <b>rs3798721</b>       |              |               |       |                       |            |               |            |                       |              |               |            |                       |
|                        | <b>Total</b> |               |       |                       | <b>Men</b> |               |            |                       | <b>Women</b> |               |            |                       |
| <b>Clinical marker</b> | <b>OR</b>    | <b>95% CI</b> |       | <b><i>p</i>-value</b> | <b>OR</b>  | <b>95% CI</b> |            | <b><i>p</i>-value</b> | <b>OR</b>    | <b>95% CI</b> |            | <b><i>p</i>-value</b> |
| <b>H-BMI</b>           | 1.01<br>5    | 0.61<br>2     | 1.685 | 0.576                 | 0.83<br>3  | 0.51<br>0     | 1.36<br>1  | 0.953                 | 0.90<br>4    | 0.63<br>6     | 1.285      | 0.468                 |
| <b>H-Waist</b>         | 0.82<br>2    | 0.57<br>6     | 1.175 | 0.282                 | 0.81<br>6  | 0.46<br>4     | 1.43<br>4  | 0.480                 | 0.76<br>1    | 0.47<br>6     | 1.217      | 0.255                 |
| <b>H-WHI</b>           | 1.11<br>4    | 0.80<br>0     | 1.552 | 0.523                 | 1.62<br>9  | 0.99<br>2     | 2.67<br>6  | 0.053                 | 0.95<br>8    | 0.58<br>0     | 1.581      | 0.867                 |
| <b>H-WHR</b>           | 0.99<br>1    | 0.71<br>1     | 1.382 | 0.959                 | 1.04<br>6  | 0.64<br>3     | 1.70<br>2  | 0.856                 | 0.94<br>5    | 0.59<br>9     | 1.492      | 0.810                 |
| <b>H-%BF</b>           | 0.99<br>6    | 0.71<br>3     | 1.391 | 0.983                 | 0.97<br>3  | 0.59<br>6     | 1.59<br>0  | 0.915                 | 1.05<br>7    | 0.66<br>7     | 1.676      | 0.813                 |
| <b>H-Insulin</b>       | 0.88<br>6    | 0.53<br>0     | 1.480 | 0.644                 | 0.52<br>4  | 0.24<br>7     | 1.11<br>5  | 0.091                 | 1.75<br>2    | 0.81<br>7     | 3.759      | 0.148                 |

|                        |              |               |                       |           |               |                       |            |               |                       |           |            |       |
|------------------------|--------------|---------------|-----------------------|-----------|---------------|-----------------------|------------|---------------|-----------------------|-----------|------------|-------|
| <b>H-Glucose</b>       | 0.43<br>0    | 0.13<br>9     | 1.336                 | 0.134     | 0.20<br>4     | 0.02<br>5             | 1.65<br>1  | 0.101         | 0.73<br>2             | 0.17<br>2 | 3.120      | 0.674 |
| <b>H-HOMA</b>          | 0.69<br>2    | 0.41<br>5     | 1.156                 | 0.159     | 0.38<br>1     | 0.17<br>4             | 0.83<br>3  | 0.013         | 1.41<br>9             | 0.67<br>3 | 2.992      | 0.358 |
| <b>H-Cholesterol</b>   | 0.60<br>2    | 0.31<br>4     | 1.154                 | 0.124     | 0.61<br>4     | 0.26<br>2             | 1.44<br>0  | 0.260         | 0.65<br>6             | 0.23<br>6 | 1.821      | 0.417 |
| <b>H-Triglycerides</b> | 0.74<br>2    | 0.49<br>0     | 1.123                 | 0.158     | 0.89<br>2     | 0.51<br>0             | 1.56<br>2  | 0.691         | 0.64<br>6             | 0.34<br>5 | 1.209      | 0.171 |
| <b>L-HDL</b>           | 1.21<br>4    | 0.86<br>5     | 1.703                 | 0.263     | 1.13<br>5     | 0.65<br>4             | 1.97<br>1  | 0.653         | 1.13<br>6             | 0.72<br>5 | 1.780      | 0.579 |
| <b>H-LDL</b>           | 0.83<br>4    | 0.37<br>5     | 1.853                 | 0.655     | 0.68<br>9     | 0.23<br>6             | 2.01<br>3  | 0.495         | 1.23<br>9             | 0.35<br>1 | 4.369      | 0.740 |
| <b>rs16870899</b>      |              |               |                       |           |               |                       |            |               |                       |           |            |       |
|                        | <b>Total</b> |               |                       |           | <b>Men</b>    |                       |            |               | <b>Women</b>          |           |            |       |
| <b>Clinical marker</b> | <b>OR</b>    | <b>95% CI</b> | <b><i>p</i>-value</b> | <b>OR</b> | <b>95% CI</b> | <b><i>p</i>-value</b> | <b>OR</b>  | <b>95% CI</b> | <b><i>p</i>-value</b> |           |            |       |
| <b>H-BMI</b>           | 1.27<br>4    | 0.56<br>7     | 2.862                 | 0.558     | 1.17<br>0     | 0.37<br>2             | 3.67<br>8  | 0.789         | 1.38<br>2             | 0.44<br>0 | 4.342      | 0.580 |
| <b>H-Waist</b>         | 0.51<br>9    | 0.19<br>3     | 1.398                 | 0.188     | 0.24<br>3     | 0.03<br>1             | 1.90<br>2  | 0.146         | 0.75<br>8             | 0.22<br>8 | 2.521      | 0.652 |
| <b>H-WHI</b>           | 0.48<br>7    | 0.20<br>2     | 1.177                 | 0.104     | 0.43<br>9     | 0.14<br>0             | 1.37<br>6  | 0.149         | 0.45<br>7             | 0.09<br>9 | 2.104      | 0.305 |
| <b>H-WHR</b>           | 0.82<br>2    | 0.36<br>7     | 1.844                 | 0.635     | 1.14<br>3     | 0.37<br>4             | 3.49<br>0  | 0.815         | 0.57<br>7             | 0.17<br>4 | 1.918      | 0.366 |
| <b>H-%BF</b>           | 1.13<br>2    | 0.50<br>7     | 2.525                 | 0.762     | 1.07<br>3     | 0.35<br>1             | 3.27<br>9  | 0.902         | 1.17<br>7             | 0.37<br>1 | 3.737      | 0.783 |
| <b>H-Insulin</b>       | 0.27<br>1    | 0.03<br>5     | 2.078                 | 0.180     | 0.75<br>9     | 0.70<br>1             | 0.82<br>2  | 0.115         | 0.77<br>1             | 0.09<br>3 | 6.386      | 0.810 |
| <b>H-Glucose</b>       | 1.39<br>3    | 0.17<br>8     | 10.92<br>2            | 0.752     | 2.78<br>1     | 0.32<br>1             | 24.0<br>64 | 0.334         | 0.97<br>3             | 0.95<br>5 | 0.992      | 0.551 |
| <b>H-HOMA</b>          | 0.55<br>3    | 0.12<br>7     | 2.400                 | 0.423     | 0.37<br>5     | 0.04<br>8             | 2.96<br>0  | 0.336         | 0.84<br>0             | 0.10<br>4 | 6.793      | 0.871 |
| <b>H-Cholesterol</b>   | 0.45<br>8    | 0.06<br>1     | 3.459                 | 0.439     | 0.73<br>5     | 0.09<br>2             | 5.86<br>7  | 0.772         | 0.94<br>0             | 0.91<br>3 | 0.967      | 0.363 |
| <b>H-Triglycerides</b> | 1.78<br>9    | 0.75<br>9     | 4.219                 | 0.179     | 1.94<br>0     | 0.61<br>4             | 6.13<br>3  | 0.253         | 1.60<br>2             | 0.42<br>5 | 6.041      | 0.484 |
| <b>L-HDL</b>           | 1.11<br>3    | 0.49<br>6     | 2.499                 | 0.795     | 0.89<br>6     | 0.24<br>0             | 3.34<br>8  | 0.870         | 1.37<br>1             | 0.45<br>0 | 4.177      | 0.579 |
| <b>H-LDL</b>           | 1.82<br>7    | 0.40<br>9     | 8.163                 | 0.424     | 1.34<br>9     | 0.16<br>5             | 11.0<br>33 | 0.780         | 2.67<br>6             | 0.31<br>3 | 22.86<br>1 | 0.352 |
| <b>rs3798722</b>       |              |               |                       |           |               |                       |            |               |                       |           |            |       |
|                        | <b>Total</b> |               |                       |           | <b>Men</b>    |                       |            |               | <b>Women</b>          |           |            |       |
| <b>Clinical marker</b> | <b>OR</b>    | <b>95% CI</b> | <b><i>p</i>-value</b> | <b>OR</b> | <b>95% CI</b> | <b><i>p</i>-value</b> | <b>OR</b>  | <b>95% CI</b> | <b><i>p</i>-value</b> |           |            |       |
| <b>H-BMI</b>           | 0.92<br>5    | 0.65<br>4     | 1.309                 | 0.661     | 1.02<br>2     | 0.62<br>1             | 1.68<br>1  | 0.932         | 0.86<br>0             | 0.52<br>8 | 1.400      | 0.545 |
| <b>H-Waist</b>         | 0.75<br>1    | 0.52<br>7     | 1.070                 | 0.113     | 0.71<br>5     | 0.40<br>9             | 1.24<br>8  | 0.238         | 0.72<br>3             | 0.45<br>3 | 1.154      | 0.175 |
| <b>H-WHI</b>           | 1.05<br>0    | 0.75<br>6     | 1.458                 | 0.770     | 1.47<br>2     | 0.90<br>8             | 2.38<br>8  | 0.117         | 0.88<br>4             | 0.53<br>6 | 1.457      | 0.630 |
| <b>H-WHR</b>           | 0.98<br>6    | 0.71<br>0     | 1.370                 | 0.934     | 1.12<br>6     | 0.69<br>8             | 1.81<br>6  | 0.628         | 0.87<br>5             | 0.55<br>5 | 1.379      | 0.566 |
| <b>H-%BF</b>           | 1.00<br>0    | 0.71<br>8     | 1.393                 | 0.998     | 0.98<br>9     | 0.61<br>0             | 1.60<br>1  | 0.963         | 1.04<br>3             | 0.65<br>9 | 1.651      | 0.857 |

|                        |              |               |       |                |            |               |           |                |              |               |       |                |
|------------------------|--------------|---------------|-------|----------------|------------|---------------|-----------|----------------|--------------|---------------|-------|----------------|
| <b>H-Insulin</b>       | 0.74<br>9    | 0.44<br>9     | 1.251 | 0.270          | 0.42<br>2  | 0.19<br>9     | 0.89<br>4 | 0.022          | 1.54<br>3    | 0.72<br>0     | 3.307 | 0.265          |
| <b>H-Glucose</b>       | 0.51<br>3    | 0.17<br>8     | 1.475 | 0.209          | 0.40<br>0  | 0.08<br>2     | 1.96<br>1 | 0.245          | 0.65<br>8    | 0.15<br>5     | 2.804 | 0.271          |
| <b>H-HOMA</b>          | 0.63<br>3    | 0.38<br>1     | 1.052 | 0.076          | 0.35<br>7  | 0.16<br>8     | 0.75<br>9 | 0.006          | 1.27<br>3    | 0.60<br>4     | 2.682 | 0.527          |
| <b>H-Cholesterol</b>   | 0.58<br>3    | 0.30<br>8     | 1.104 | 0.095          | 0.61<br>7  | 0.27<br>0     | 1.40<br>7 | 0.249          | 0.58<br>8    | 0.21<br>2     | 1.632 | 0.305          |
| <b>H-Triglycerides</b> | 0.89<br>3    | 0.59<br>6     | 1.337 | 0.582          | 1.06<br>8  | 0.62<br>0     | 1.84<br>1 | 0.813          | 0.77<br>0    | 0.41<br>8     | 1.420 | 0.404          |
| <b>L-HDL</b>           | 1.21<br>5    | 0.86<br>8     | 1.700 | 0.257          | 1.06<br>8  | 0.62<br>0     | 1.84<br>1 | 0.813          | 1.21<br>3    | 0.77<br>6     | 1.898 | 0.398          |
| <b>H-LDL</b>           | 1.00<br>3    | 0.46<br>1     | 2.182 | 0.994          | 0.77<br>1  | 0.27<br>7     | 2.14<br>8 | 0.620          | 1.69<br>1    | 0.46<br>8     | 6.116 | 0.420          |
| <b>rs9393903</b>       |              |               |       |                |            |               |           |                |              |               |       |                |
|                        | <b>Total</b> |               |       |                | <b>Men</b> |               |           |                | <b>Women</b> |               |       |                |
| <b>Clinical marker</b> | <b>OR</b>    | <b>95% CI</b> |       | <b>p-value</b> | <b>OR</b>  | <b>95% CI</b> |           | <b>p-value</b> | <b>OR</b>    | <b>95% CI</b> |       | <b>p-value</b> |
| <b>H-BMI</b>           | 0.86<br>5    | 0.60<br>3     | 1.240 | 0.430          | 0.84<br>1  | 0.49<br>8     | 1.41<br>7 | 0.516          | 0.90<br>4    | 0.54<br>9     | 1.490 | 0.694          |
| <b>H-Waist</b>         | 0.75<br>5    | 0.52<br>2     | 1.091 | 0.134          | 0.65<br>0  | 0.35<br>9     | 1.17<br>9 | 0.155          | 0.78<br>1    | 0.48<br>3     | 1.262 | 0.314          |
| <b>H-WHI</b>           | 1.21<br>0    | 0.86<br>4     | 1.697 | 0.268          | 1.52<br>3  | 0.91<br>7     | 2.52<br>8 | 0.104          | 1.17<br>4    | 0.70<br>7     | 1.950 | 0.536          |
| <b>H-WHR</b>           | 0.93<br>3    | 0.66<br>5     | 1.310 | 0.691          | 0.96<br>4  | 0.58<br>6     | 1.58<br>3 | 0.884          | 0.90<br>8    | 0.57<br>0     | 1.446 | 0.686          |
| <b>H-%BF</b>           | 1.01<br>5    | 0.72<br>2     | 1.427 | 0.934          | 0.88<br>5  | 0.53<br>6     | 1.46<br>0 | 0.633          | 1.17<br>8    | 0.73<br>8     | 1.882 | 0.493          |
| <b>H-Insulin</b>       | 0.65<br>2    | 0.37<br>7     | 1.127 | 0.124          | 0.29<br>9  | 0.12<br>5     | 0.71<br>3 | 0.004          | 1.48<br>0    | 0.68<br>8     | 3.184 | 0.316          |
| <b>H-Glucose</b>       | 0.36<br>5    | 0.10<br>4     | 1.286 | 0.103          | 0.23<br>9  | 0.03<br>0     | 1.94<br>3 | 0.148          | 0.51<br>3    | 0.10<br>2     | 2.582 | 0.411          |
| <b>H-HOMA</b>          | 0.56<br>0    | 0.32<br>2     | 0.972 | 0.038          | 0.20<br>4  | 0.07<br>7     | 0.53<br>9 | 0.001          | 1.41<br>5    | 0.66<br>8     | 2.999 | 0.364          |
| <b>H-Cholesterol</b>   | 0.59<br>4    | 0.30<br>1     | 1.173 | 0.130          | 0.73<br>2  | 0.31<br>1     | 1.71<br>9 | 0.474          | 0.46<br>3    | 0.14<br>7     | 1.454 | 0.179          |
| <b>H-Triglycerides</b> | 0.67<br>8    | 0.44<br>0     | 1.043 | 0.076          | 0.69<br>8  | 0.38<br>8     | 1.25<br>6 | 0.231          | 0.69<br>5    | 0.36<br>5     | 1.322 | 0.267          |
| <b>L-HDL</b>           | 1.38<br>0    | 0.97<br>8     | 1.947 | 0.067          | 1.26<br>1  | 0.72<br>3     | 2.20<br>0 | 0.416          | 1.37<br>1    | 0.86<br>7     | 2.168 | 0.177          |
| <b>H-LDL</b>           | 0.86<br>8    | 0.38<br>3     | 1.967 | 0.734          | 0.81<br>5  | 0.27<br>9     | 2.38<br>4 | 0.710          | 1.04<br>3    | 0.28<br>8     | 3.774 | 0.949          |
| <b>rs4532436</b>       |              |               |       |                |            |               |           |                |              |               |       |                |
|                        | <b>Total</b> |               |       |                | <b>Men</b> |               |           |                | <b>Women</b> |               |       |                |
| <b>Clinical marker</b> | <b>OR</b>    | <b>95% CI</b> |       | <b>p-value</b> | <b>OR</b>  | <b>95% CI</b> |           | <b>p-value</b> | <b>OR</b>    | <b>95% CI</b> |       | <b>p-value</b> |
| <b>H-BMI</b>           | 1.47<br>3    | 1.04<br>0     | 2.087 | 0.029          | 1.39<br>5  | 0.85<br>0     | 2.29<br>1 | 0.138          | 1.58<br>1    | 0.96<br>7     | 2.586 | 0.067          |
| <b>H-Waist</b>         | 1.44<br>8    | 1.01<br>9     | 2.058 | 0.039          | 1.68<br>4  | 0.97<br>8     | 2.89<br>9 | 0.059          | 1.24<br>7    | 0.78<br>1     | 1.990 | 0.356          |
| <b>H-WHI</b>           | 0.90<br>5    | 0.65<br>1     | 1.258 | 0.552          | 1.06<br>8  | 0.66<br>2     | 1.72<br>1 | 0.789          | 0.84<br>5    | 0.51<br>0     | 1.399 | 0.514          |
| <b>H-WHR</b>           | 1.20<br>8    | 0.86<br>9     | 1.679 | 0.262          | 1.21<br>6  | 0.75<br>5     | 1.95<br>8 | 0.423          | 1.19<br>9    | 0.75<br>9     | 1.896 | 0.438          |

|                        |           |           |       |       |           |           |           |       |           |           |       |       |
|------------------------|-----------|-----------|-------|-------|-----------|-----------|-----------|-------|-----------|-----------|-------|-------|
| <b>H-%BF</b>           | 1.18<br>0 | 0.84<br>6 | 1.647 | 0.329 | 1.35<br>6 | 0.83<br>6 | 2.19<br>9 | 0.218 | 1.06<br>6 | 0.67<br>2 | 1.694 | 0.286 |
| <b>H-Insulin</b>       | 2.24<br>8 | 1.35<br>7 | 3.722 | 0.001 | 2.92<br>4 | 1.47<br>6 | 5.79<br>2 | 0.002 | 1.67<br>0 | 0.77<br>8 | 3.584 | 0.187 |
| <b>H-Glucose</b>       | 1.44<br>2 | 0.54<br>9 | 3.791 | 0.457 | 1.76<br>1 | 0.46<br>3 | 6.70<br>0 | 0.403 | 1.17<br>5 | 0.28<br>8 | 4.787 | 0.822 |
| <b>H-HOMA</b>          | 2.02<br>5 | 1.23<br>7 | 3.315 | 0.004 | 2.71<br>0 | 1.39<br>5 | 5.26<br>7 | 0.003 | 1.48<br>6 | 0.70<br>3 | 3.143 | 0.299 |
| <b>H-Cholesterol</b>   | 2.65<br>4 | 1.41<br>8 | 4.966 | 0.002 | 2.93<br>5 | 1.31<br>1 | 6.56<br>8 | 0.007 | 2.46<br>5 | 0.90<br>0 | 6.749 | 0.071 |
| <b>H-Triglycerides</b> | 1.14<br>3 | 0.76<br>7 | 1.705 | 0.512 | 1.33<br>2 | 0.77<br>8 | 2.27<br>9 | 0.297 | 0.99<br>6 | 0.54<br>2 | 1.830 | 0.990 |
| <b>L-HDL</b>           | 0.86<br>4 | 0.61<br>5 | 1.213 | 0.398 | 0.80<br>5 | 0.46<br>4 | 1.39<br>5 | 0.441 | 0.83<br>4 | 0.53<br>1 | 1.310 | 0.432 |
| <b>H-LDL</b>           | 1.38<br>6 | 0.64<br>0 | 3.003 | 0.406 | 2.06<br>5 | 0.76<br>3 | 5.59<br>1 | 0.147 | 0.77<br>4 | 0.21<br>4 | 2.798 | 0.696 |

**rs12195587**

| Clinical marker        | Total     |           |                 |       | Men       |                 |            | Women  |                 |           |        |                 |
|------------------------|-----------|-----------|-----------------|-------|-----------|-----------------|------------|--------|-----------------|-----------|--------|-----------------|
|                        | OR        | 95% CI    | <i>p</i> -value | OR    | 95% CI    | <i>p</i> -value | OR         | 95% CI | <i>p</i> -value | OR        | 95% CI | <i>p</i> -value |
| <b>H-BMI</b>           | 1.28<br>2 | 0.78<br>9 | 2.084           | 0.316 | 1.28<br>5 | 0.64<br>7       | 2.55<br>2  | 0.476  | 1.27<br>6       | 0.64<br>1 | 2.540  | 0.488           |
| <b>H- Waist</b>        | 1.42<br>0 | 0.87<br>4 | 2.306           | 0.156 | 1.80<br>8 | 0.88<br>4       | 3.69<br>5  | 0.102  | 1.18<br>3       | 0.60<br>8 | 2.301  | 0.622           |
| <b>H-WHI</b>           | 1.13<br>5 | 0.71<br>0 | 1.815           | 0.598 | 1.25<br>9 | 0.63<br>2       | 2.50<br>6  | 0.513  | 1.02<br>2       | 0.49<br>7 | 2.102  | 0.954           |
| <b>H-WHR</b>           | 1.22<br>5 | 0.76<br>7 | 1.956           | 0.396 | 1.38<br>2 | 0.70<br>7       | 2.70<br>2  | 0.344  | 1.09<br>2       | 0.56<br>7 | 2.102  | 0.794           |
| <b>H-%BF</b>           | 1.18<br>4 | 0.73<br>9 | 1.898           | 0.482 | 1.62<br>4 | 0.81<br>5       | 3.23<br>7  | 0.167  | 0.87<br>5       | 0.45<br>0 | 1.702  | 0.696           |
| <b>H-Insulin</b>       | 1.26<br>8 | 0.64<br>9 | 2.479           | 0.488 | 1.47<br>7 | 0.62<br>6       | 3.48<br>7  | 0.374  | 0.94<br>0       | 0.30<br>4 | 2.906  | 0.915           |
| <b>H-Glucose</b>       | 1.45<br>2 | 0.40<br>5 | 5.209           | 0.566 | 2.09<br>6 | 0.40<br>8       | 10.7<br>70 | 0.367  | 0.89<br>9       | 0.10<br>8 | 7.497  | 0.922           |
| <b>H-HOMA</b>          | 1.61<br>8 | 0.85<br>1 | 3.077           | 0.139 | 1.62<br>7 | 0.68<br>0       | 3.89<br>3  | 0.273  | 1.64<br>4       | 0.62<br>7 | 4.305  | 0.309           |
| <b>H-Cholesterol</b>   | 1.77<br>6 | 0.84<br>6 | 3.726           | 0.125 | 2.15<br>0 | 0.85<br>2       | 5.42<br>6  | 0.099  | 1.28<br>2       | 0.35<br>5 | 4.633  | 0.705           |
| <b>H-Triglycerides</b> | 1.00<br>9 | 0.56<br>7 | 1.794           | 0.976 | 1.14<br>4 | 0.53<br>9       | 2.42<br>7  | 0.727  | 0.83<br>7       | 0.33<br>3 | 2.107  | 0.707           |
| <b>L-HDL</b>           | 0.95<br>3 | 0.58<br>5 | 1.552           | 0.847 | 0.98<br>4 | 0.45<br>5       | 2.12<br>8  | 0.967  | 0.93<br>9       | 0.48<br>9 | 1.806  | 0.852           |
| <b>H-LDL</b>           | 0.76<br>9 | 0.22<br>6 | 2.614           | 0.674 | 1.33<br>8 | 0.36<br>7       | 4.88<br>1  | 0.660  | 0.96<br>2       | 0.94<br>0 | 0.985  | 0.202           |

**ELOVL3**

**rs10748816**

| Clinical marker | Total     |           |                 |       | Men       |                 |           | Women  |                 |           |        |                 |
|-----------------|-----------|-----------|-----------------|-------|-----------|-----------------|-----------|--------|-----------------|-----------|--------|-----------------|
|                 | OR        | 95% CI    | <i>p</i> -value | OR    | 95% CI    | <i>p</i> -value | OR        | 95% CI | <i>p</i> -value | OR        | 95% CI | <i>p</i> -value |
| <b>H-BMI</b>    | 0.91<br>0 | 0.61<br>9 | 1.338           | 0.632 | 0.92<br>5 | 0.54<br>4       | 1.57<br>3 | 0.776  | 0.91<br>7       | 0.52<br>3 | 1.611  | 0.765           |
| <b>H- Waist</b> | 1.12<br>6 | 0.75<br>8 | 1.673           | 0.556 | 1.16<br>2 | 0.64<br>3       | 2.10<br>2 | 0.620  | 1.01<br>2       | 0.58<br>8 | 1.741  | 0.967           |

|                        |                  |               |            |                |            |               |            |                |              |               |            |                |
|------------------------|------------------|---------------|------------|----------------|------------|---------------|------------|----------------|--------------|---------------|------------|----------------|
| <b>H-WHI</b>           | 0.57<br>8        | 0.40<br>1     | 0.832      | 0.003          | 0.50<br>8  | 0.29<br>8     | 0.86<br>6  | 0.012          | 0.75<br>1    | 0.42<br>6     | 1.324      | 0.323          |
| <b>H-WHR</b>           | 0.80<br>4        | 0.55<br>8     | 1.158      | 0.241          | 0.89<br>6  | 0.53<br>9     | 1.49<br>0  | 0.674          | 0.71<br>3    | 0.42<br>0     | 1.209      | 0.209          |
| <b>H-%BF</b>           | 1.01<br>8        | 0.70<br>4     | 1.471      | 0.926          | 1.05<br>9  | 0.63<br>4     | 1.77<br>1  | 0.827          | 1.01<br>4    | 0.59<br>5     | 1.729      | 0.958          |
| <b>H-Insulin</b>       | 1.33<br>3        | 0.74<br>0     | 2.401      | 0.339          | 1.75<br>0  | 0.80<br>3     | 3.81<br>4  | 0.157          | 1.04<br>2    | 0.42<br>1     | 2.579      | 0.929          |
| <b>H-Glucose</b>       | 1.22<br>7        | 0.39<br>4     | 3.820      | 0.724          | 1.54<br>9  | 0.31<br>5     | 7.61<br>4  | 0.589          | 0.96<br>9    | 0.19<br>2     | 4.907      | 0.970          |
| <b>H-HOMA</b>          | 1.23<br>0        | 0.69<br>1     | 2.191      | 0.482          | 1.31<br>3  | 0.62<br>5     | 2.75<br>6  | 0.474          | 1.26<br>5    | 0.49<br>6     | 3.224      | 0.624          |
| <b>H-Cholesterol</b>   | 1.64<br>2        | 0.77<br>6     | 3.476      | 0.192          | 1.42<br>1  | 0.58<br>3     | 3.46<br>1  | 0.440          | 2.70<br>3    | 0.60<br>7     | 12.03<br>5 | 0.176          |
| <b>H-Triglycerides</b> | 0.81<br>7        | 0.52<br>8     | 1.265      | 0.366          | 0.81<br>2  | 0.45<br>8     | 1.43<br>9  | 0.477          | 0.90<br>6    | 0.45<br>3     | 1.810      | 0.780          |
| <b>L-HDL</b>           | 0.82<br>5        | 0.56<br>9     | 1.196      | 0.311          | 0.74<br>6  | 0.42<br>2     | 1.31<br>8  | 0.313          | 0.76<br>6    | 0.45<br>6     | 1.286      | 0.315          |
| <b>H-LDL</b>           | 1.68<br>7        | 0.62<br>8     | 4.533      | 0.295          | 1.05<br>2  | 0.35<br>9     | 3.08<br>4  | 0.926          | 1.04<br>4    | 1.01<br>7     | 1.073      | 0.068          |
| <b>rs36103207</b>      |                  |               |            |                |            |               |            |                |              |               |            |                |
|                        | <b>Total</b>     |               |            |                | <b>Men</b> |               |            |                | <b>Women</b> |               |            |                |
| <b>Clinical marker</b> | <b>OR</b>        | <b>95% CI</b> |            | <b>p-value</b> | <b>OR</b>  | <b>95% CI</b> |            | <b>p-value</b> | <b>OR</b>    | <b>95% CI</b> |            | <b>p-value</b> |
| <b>H-BMI</b>           | 0.39<br>7        | 0.08<br>6     | 1.829      | 0.221          | 0.45<br>9  | 0.05<br>1     | 4.16<br>5  | 0.480          | 0.35<br>6    | 0.04<br>2     | 3.002      | 0.324          |
| <b>H- Waist</b>        |                  |               |            |                |            |               |            |                |              |               |            |                |
| <b>H-WHI</b>           | 0.67<br>5        | 0.20<br>1     | 2.268      | 0.524          | 0.48<br>0  | 0.07<br>9     | 2.91<br>6  | 0.417          | 1.03<br>3    | 0.19<br>7     | 5.429      | 0.969          |
| <b>H-WHR</b>           | 0.94<br>7        | 0.29<br>7     | 3.018      | 0.926          | 0.32<br>6  | 0.03<br>6     | 2.95<br>2  | 0.296          | 1.79<br>5    | 0.39<br>5     | 8.163      | 0.444          |
| <b>H-%BF</b>           | 0.64<br>3        | 0.20<br>8     | 1.990      | 0.441          | 0.22<br>4  | 0.02<br>5     | 2.02<br>8  | 0.147          | 1.17<br>4    | 0.28<br>8     | 4.787      | 0.826          |
| <b>H-Insulin</b>       | 0.81<br>4        | 0.77<br>8     | 0.853      | 0.179          | 0.76<br>5  | 0.70<br>8     | 0.82<br>7  | 0.341          | 0.85<br>8    | 0.81<br>3     | 0.906      | 0.367          |
| <b>H-Glucose</b>       | 0.97<br>1        | 0.95<br>7     | 0.985      | 0.534          | 0.96<br>8  | 0.94<br>8     | 0.98<br>9  | 0.687          | 0.97<br>4    | 0.95<br>6     | 0.992      | 0.643          |
| <b>H-HOMA</b>          | 0.85<br>8        | 0.82<br>9     | 0.888      | 0.160          | 0.82<br>1  | 0.77<br>5     | 0.87<br>0  | 0.353          | 0.89<br>1    | 0.85<br>6     | 0.928      | 0.326          |
| <b>H-Cholesterol</b>   | 0.97<br>8        | 0.12<br>4     | 7.691      | 0.983          | 2.27<br>7  | 0.24<br>6     | 21.0<br>85 | 0.458          | 0.94<br>1    | 0.91<br>4     | 0.968      | 0.479          |
| <b>H-Triglycerides</b> | 0.32<br>0        | 0.04<br>1     | 2.487      | 0.252          | 0.74<br>6  | 0.08<br>2     | 6.78<br>9  | 0.795          | 0.83<br>5    | 0.79<br>4     | 0.878      | 0.211          |
| <b>L-HDL</b>           | 1.11<br>1        | 0.35<br>9     | 3.439      | 0.856          | 0.74<br>6  | 0.08<br>2     | 6.78<br>9  | 0.795          | 1.16<br>4    | 0.28<br>6     | 4.741      | 0.832          |
| <b>H-LDL</b>           | 1.79<br>5        | 0.22<br>5     | 14.33<br>2 | 0.577          | 4.17<br>2  | 0.44<br>0     | 39.5<br>27 | 0.178          | 0.96<br>7    | 0.94<br>7     | 0.987      | 0.603          |
| <b>ELOVL4</b>          |                  |               |            |                |            |               |            |                |              |               |            |                |
|                        | <b>rs3812153</b> |               |            |                |            |               |            |                |              |               |            |                |
|                        | <b>Total</b>     |               |            |                | <b>Men</b> |               |            |                | <b>Women</b> |               |            |                |
| <b>Clinical marker</b> | <b>OR</b>        | <b>95% CI</b> |            | <b>p-value</b> | <b>OR</b>  | <b>95% CI</b> |            | <b>p-value</b> | <b>OR</b>    | <b>95% CI</b> |            | <b>p-value</b> |

|                        |              |               |                |           |               |                |            |               |                |           |               |                |
|------------------------|--------------|---------------|----------------|-----------|---------------|----------------|------------|---------------|----------------|-----------|---------------|----------------|
| <b>H-BMI</b>           | 0.74<br>1    | 0.50<br>6     | 1.085          | 0.123     | 0.69<br>5     | 0.40<br>4      | 1.19<br>6  | 0.189         | 0.78<br>7      | 0.46<br>0 | 1.347         | 0.384          |
| <b>H- Waist</b>        | 0.86<br>2    | 0.58<br>9     | 1.261          | 0.444     | 0.83<br>0     | 0.45<br>9      | 1.49<br>9  | 0.537         | 0.88<br>5      | 0.53<br>4 | 1.467         | 0.636          |
| <b>H-WHI</b>           | 0.94<br>5    | 0.66<br>4     | 1.345          | 0.754     | 0.91<br>4     | 0.55<br>1      | 1.51<br>6  | 0.729         | 0.96<br>1      | 0.55<br>9 | 1.650         | 0.885          |
| <b>H-WHR</b>           | 0.90<br>1    | 0.63<br>3     | 1.283          | 0.565     | 0.79<br>5     | 0.47<br>8      | 1.32<br>5  | 0.381         | 1.01<br>2      | 0.62<br>1 | 1.652         | 0.961          |
| <b>H-%BF</b>           | 0.90<br>8    | 0.63<br>6     | 1.295          | 0.594     | 0.93<br>2     | 0.56<br>0      | 1.55<br>3  | 0.789         | 0.88<br>2      | 0.53<br>7 | 1.450         | 0.623          |
| <b>H-Insulin</b>       | 0.63<br>5    | 0.35<br>8     | 1.127          | 0.119     | 0.51<br>9     | 0.23<br>9      | 1.12<br>7  | 0.095         | 0.79<br>0      | 0.33<br>4 | 1.868         | 0.593          |
| <b>H-Glucose</b>       | 1.21<br>5    | 0.44<br>3     | 3.337          | 0.706     | 2.83<br>8     | 0.74<br>4      | 10.8<br>32 | 0.113         | 0.31<br>3      | 0.03<br>8 | 2.578         | 0.256          |
| <b>H-HOMA</b>          | 0.63<br>3    | 0.36<br>0     | 1.111          | 0.109     | 0.56<br>7     | 0.26<br>6      | 1.21<br>2  | 0.141         | 0.72<br>4      | 0.31<br>1 | 1.686         | 0.455          |
| <b>H-Cholesterol</b>   | 1.15<br>7    | 0.61<br>6     | 2.172          | 0.651     | 1.38<br>5     | 0.62<br>5      | 3.06<br>8  | 0.423         | 0.85<br>4      | 0.29<br>6 | 2.466         | 0.771          |
| <b>H-Triglycerides</b> | 0.91<br>0    | 0.58<br>9     | 1.405          | 0.670     | 0.66<br>2     | 0.36<br>2      | 1.21<br>1  | 0.180         | 1.32<br>0      | 0.69<br>9 | 2.491         | 0.393          |
| <b>L-HDL</b>           | 1.09<br>9    | 0.76<br>8     | 1.574          | 0.605     | 1.12<br>9     | 0.63<br>9      | 1.99<br>5  | 0.678         | 1.09<br>8      | 0.67<br>8 | 1.779         | 0.704          |
| <b>H-LDL</b>           | 1.82<br>5    | 0.83<br>7     | 3.981          | 0.126     | 2.03<br>8     | 0.75<br>9      | 5.46<br>8  | 0.151         | 1.51<br>4      | 0.41<br>7 | 5.495         | 0.527          |
| <b>rs117891930</b>     |              |               |                |           |               |                |            |               |                |           |               |                |
|                        | <b>Total</b> |               |                |           | <b>Men</b>    |                |            |               | <b>Women</b>   |           |               |                |
| <b>Clinical marker</b> | <b>OR</b>    | <b>95% CI</b> | <b>p-value</b> | <b>OR</b> | <b>95% CI</b> | <b>p-value</b> | <b>OR</b>  | <b>95% CI</b> | <b>p-value</b> | <b>OR</b> | <b>95% CI</b> | <b>p-value</b> |
| <b>H-BMI</b>           | 1.15<br>8    | 0.47<br>7     | 2.81           | 0.746     | 0.68<br>8     | 0.17<br>8      | 2.65<br>2  | 0.586         | 1.86<br>1      | 0.55<br>4 | 6.257         | 0.31           |
| <b>H- Waist</b>        | 1.57<br>5    | 0.66<br>1     | 3.752          | 0.303     | 1.14<br>7     | 0.29<br>6      | 4.44<br>6  | 0.843         | 2.13<br>1      | 0.63<br>5 | 7.147         | 0.212          |
| <b>H-WHI</b>           | 0.94         | 0.39<br>6     | 2.235          | 0.889     | 0.87          | 0.25<br>9      | 2.91<br>9  | 0.822         | 0.96<br>7      | 0.25      | 3.733         | 0.961          |
| <b>H-WHR</b>           | 1.11         | 0.47<br>2     | 2.611          | 0.811     | 0.74<br>9     | 0.21<br>4      | 2.61<br>8  | 0.651         | 1.62<br>2      | 0.48<br>4 | 5.436         | 0.43           |
| <b>H-%BF</b>           | 0.68<br>4    | 0.27<br>5     | 1.699          | 0.411     | 0.25<br>2     | 0.05<br>1      | 1.23<br>3  | 0.068         | 1.42<br>2      | 0.42<br>4 | 4.765         | 0.568          |
| <b>H-Insulin</b>       | 1.93<br>3    | 0.66          | 5.657          | 0.222     | 0.94<br>8     | 0.19           | 4.73       | 0.948         | 4.02<br>9      | 0.91<br>2 | 17.79<br>3    | 0.049          |
| <b>H-Glucose</b>       | 3.74<br>7    | 0.80<br>2     | 17.5           | 0.072     | 3.36<br>3     | 0.38<br>3      | 29.5<br>26 | 0.248         | 4.18<br>6      | 0.46<br>9 | 37.32<br>7    | 0.165          |
| <b>H-HOMA</b>          | 3.58<br>2    | 1.38<br>1     | 9.29           | 0.005     | 3.31<br>7     | 0.89<br>6      | 12.2<br>8  | 0.059         | 3.90<br>3      | 0.95<br>5 | 15.95         | 0.042          |
| <b>H-Cholesterol</b>   | 1.18<br>2    | 0.26<br>8     | 5.22           | 0.825     | 0.88<br>9     | 0.11           | 7.20<br>7  | 0.913         | 1.66<br>5      | 0.20<br>1 | 13.77<br>3    | 0.634          |
| <b>H-Triglycerides</b> | 1.49         | 0.57<br>1     | 3.893          | 0.413     | 1.75<br>6     | 0.49<br>9      | 6.18<br>3  | 0.377         | 1.16<br>7      | 0.24<br>4 | 5.568         | 0.847          |
| <b>L-HDL</b>           | 0.65<br>5    | 0.25<br>3     | 1.7            | 0.383     | 0.65<br>7     | 0.13<br>9      | 3.11<br>5  | 0.596         | 0.65<br>3      | 0.18<br>7 | 2.278         | 0.502          |
| <b>H-LDL</b>           | 1.00<br>9    | 0.13<br>1     | 7.794          | 0.993     | 0.93<br>9     | 0.91<br>1      | 0.96<br>7  | 0.399         | 3.23<br>3      | 0.37<br>3 | 28.03<br>7    | 0.262          |
| <b>rs80246554</b>      |              |               |                |           |               |                |            |               |                |           |               |                |
|                        | <b>Total</b> |               |                |           | <b>Men</b>    |                |            |               | <b>Women</b>   |           |               |                |

| Clinical marker   | OR        | 95% CI    | <i>p</i> -value | OR    | 95% CI    | <i>p</i> -value | OR        | 95% CI | <i>p</i> -value |           |            |       |
|-------------------|-----------|-----------|-----------------|-------|-----------|-----------------|-----------|--------|-----------------|-----------|------------|-------|
| H-BMI             | 0.96<br>5 | 0.47<br>4 | 1.965           | 0.923 | 0.59<br>9 | 0.21<br>1       | 1.70<br>1 | 0.333  | 1.56<br>7       | 0.57<br>8 | 4.251      | 0.376 |
| H- Waist          | 1.07<br>7 | 0.52<br>9 | 2.194           | 0.838 | 0.74<br>6 | 0.24<br>1       | 2.31      | 0.612  | 1.57<br>5       | 0.59      | 4.204      | 0.363 |
| H-WHI             | 1.31<br>2 | 0.67<br>4 | 2.554           | 0.424 | 0.88<br>3 | 0.35<br>4       | 2.20<br>3 | 0.791  | 1.87<br>8       | 0.69<br>1 | 5.105      | 0.211 |
| H-WHR             | 1.01<br>2 | 0.51<br>7 | 1.98            | 0.973 | 0.87<br>5 | 0.34<br>6       | 2.21<br>2 | 0.779  | 1.19<br>2       | 0.44<br>7 | 3.179      | 0.726 |
| H-%BF             | 0.71<br>3 | 0.35<br>3 | 1.441           | 0.345 | 0.47<br>8 | 0.17<br>2       | 1.33<br>2 | 0.151  | 1.04<br>2       | 0.39<br>1 | 2.779      | 0.935 |
| H-Insulin         | 2.24<br>4 | 0.93<br>1 | 5.407           | 0.066 | 1.36<br>2 | 0.40<br>6       | 4.56<br>5 | 0.618  | 3.93<br>7       | 1.08      | 14.34<br>5 | 0.027 |
| H-Glucose         | 2.08<br>4 | 0.45<br>8 | 9.475           | 0.332 | 1.71<br>1 | 0.20<br>3       | 14.4      | 0.619  | 2.56<br>3       | 0.29<br>7 | 22.10<br>7 | 0.377 |
| H-HOMA            | 2.62<br>2 | 1.16<br>4 | 5.908           | 0.016 | 2.26<br>1 | 0.74<br>5       | 6.86<br>4 | 0.142  | 3.08<br>6       | 0.93      | 10.23<br>9 | 0.054 |
| H-Cholesterol     | 1.03<br>9 | 0.30<br>7 | 3.518           | 0.951 | 0.45<br>1 | 0.05<br>8       | 3.49<br>9 | 0.437  | 2.31<br>7       | 0.48<br>7 | 11.01<br>4 | 0.279 |
| H-Triglycerides   | 1.48<br>8 | 0.7       | 3.164           | 0.3   | 1.68<br>2 | 0.64<br>4       | 4.39<br>4 | 0.286  | 1.12<br>6       | 0.31<br>1 | 4.072      | 0.857 |
| L-HDL             | 0.84<br>2 | 0.41<br>4 | 1.712           | 0.636 | 0.73<br>5 | 0.23<br>8       | 2.27<br>5 | 0.594  | 1.03<br>3       | 0.38<br>8 | 2.75       | 0.949 |
| H-LDL             | 1.22<br>7 | 0.27<br>9 | 5.394           | 0.786 | 0.93<br>7 | 0.90<br>8       | 0.96<br>6 | 0.247  | 4.76<br>7       | 0.93      | 24.43      | 0.04  |
| <b>rs12196014</b> |           |           |                 |       |           |                 |           |        |                 |           |            |       |
|                   | Total     |           |                 |       | Men       |                 |           |        | Women           |           |            |       |
| Clinical marker   | OR        | 95% CI    | <i>p</i> -value | OR    | 95% CI    | <i>p</i> -value | OR        | 95% CI | <i>p</i> -value |           |            |       |
| H-BMI             | 0.93      | 0.57<br>1 | 1.515           | 0.772 | 0.79<br>3 | 0.4<br>3        | 1.57<br>3 | 0.508  | 1.09<br>1       | 0.54<br>4 | 2.188      | 0.807 |
| H- Waist          | 0.88<br>2 | 0.53<br>8 | 1.448           | 0.621 | 0.91<br>7 | 0.43<br>8       | 1.91<br>9 | 0.818  | 0.89<br>5       | 0.45<br>5 | 1.761      | 0.749 |
| H-WHI             | 1.08<br>8 | 0.69<br>1 | 1.712           | 0.717 | 0.98<br>2 | 0.52            | 1.85<br>3 | 0.955  | 1.09<br>9       | 0.54<br>2 | 2.226      | 0.795 |
| H-WHR             | 0.99<br>1 | 0.62<br>6 | 1.569           | 0.97  | 1.13<br>4 | 0.6<br>5        | 2.14<br>5 | 0.699  | 0.85<br>9       | 0.44<br>2 | 1.671      | 0.656 |
| H-%BF             | 0.76<br>9 | 0.48      | 1.232           | 0.275 | 0.62<br>8 | 0.32<br>5       | 1.21<br>7 | 0.167  | 0.93<br>5       | 0.47<br>7 | 1.832      | 0.846 |
| H-Insulin         | 1.51<br>9 | 0.79<br>7 | 2.896           | 0.202 | 1.49<br>5 | 0.65<br>2       | 3.42<br>8 | 0.343  | 1.38<br>9       | 0.48<br>4 | 3.988      | 0.542 |
| H-Glucose         | 1.15<br>3 | 0.32<br>4 | 4.095           | 0.826 | 0.60<br>1 | 0.07<br>3       | 4.91<br>9 | 0.633  | 2.00<br>8       | 0.39<br>2 | 10.29<br>1 | 0.396 |
| H-HOMA            | 1.59<br>1 | 0.85      | 2.98            | 0.144 | 1.78<br>7 | 0.79<br>5       | 4.01<br>5 | 0.157  | 1.28<br>6       | 0.46      | 3.593      | 0.632 |
| H-Cholesterol     | 0.81<br>1 | 0.33<br>3 | 1.977           | 0.646 | 0.58<br>2 | 0.16<br>8       | 2.02      | 0.391  | 1.19            | 0.33      | 4.297      | 0.791 |
| H-Triglycerides   | 1.56<br>2 | 0.92<br>9 | 2.628           | 0.091 | 1.97<br>8 | 1.01<br>1       | 3.87<br>1 | 0.044  | 1.03<br>5       | 0.43<br>1 | 2.489      | 0.938 |
| L-HDL             | 1.06<br>3 | 0.66<br>6 | 1.696           | 0.8   | 0.94<br>4 | 0.45<br>1       | 1.97<br>7 | 0.879  | 1.27<br>7       | 0.66<br>9 | 2.44       | 0.459 |
| H-LDL             | 0.41<br>5 | 0.09<br>7 | 1.786           | 0.224 | 0.92<br>6 | 0.89<br>2       | 0.96      | 0.054  | 1.49<br>4       | 0.30<br>6 | 7.285      | 0.619 |
| <b>rs9448863</b>  |           |           |                 |       |           |                 |           |        |                 |           |            |       |



| Clinical marker   | Total     |               |                 |           | Men       |                 |           | Women     |                 |            |        |                 |
|-------------------|-----------|---------------|-----------------|-----------|-----------|-----------------|-----------|-----------|-----------------|------------|--------|-----------------|
|                   | OR        | 95% CI        | <i>p</i> -value | OR        | 95% CI    | <i>p</i> -value | OR        | 95% CI    | <i>p</i> -value | OR         | 95% CI | <i>p</i> -value |
| H-BMI             | 0.76<br>1 | 0.52<br>1.112 | 0.158           | 0.71<br>2 | 0.41<br>4 | 1.22<br>6       | 0.221     | 0.81<br>2 | 0.47<br>7       | 1.382      | 0.443  |                 |
| H- Waist          | 0.88<br>5 | 0.60<br>1.293 | 0.527           | 0.84<br>8 | 0.46<br>9 | 1.53<br>2       | 0.586     | 0.90<br>2 | 0.54<br>6       | 1.489      | 0.687  |                 |
| H-WHI             | 0.90<br>3 | 0.63<br>1.284 | 0.57            | 0.88<br>8 | 0.53<br>5 | 1.47<br>4       | 0.648     | 0.92<br>2 | 0.53<br>7       | 1.581      | 0.768  |                 |
| H-WHR             | 0.91<br>8 | 0.64<br>1.306 | 0.636           | 0.81<br>8 | 0.49<br>1 | 1.36<br>4       | 0.442     | 1.02<br>1 | 0.62<br>8       | 1.661      | 0.933  |                 |
| H-%BF             | 0.92<br>3 | 0.64<br>1.316 | 0.66            | 0.96<br>6 | 0.57<br>9 | 1.61<br>2       | 0.895     | 0.88<br>8 | 0.54<br>2       | 1.455      | 0.639  |                 |
| H-Insulin         | 0.57<br>4 | 0.32<br>1.029 | 0.06            | 0.45<br>4 | 0.20<br>4 | 1.01<br>2       | 0.05      | 0.75<br>3 | 0.31<br>9       | 1.778      | 0.518  |                 |
| H-Glucose         | 1.20<br>5 | 0.43<br>3.31  | 0.717           | 2.88<br>7 | 0.75<br>6 | 11.0<br>19      | 0.106     | 0.30<br>3 | 0.03<br>7       | 2.5        | 0.242  |                 |
| H-HOMA            | 0.57<br>6 | 0.32<br>1.022 | 0.057           | 0.49<br>6 | 0.22<br>6 | 1.08<br>8       | 0.077     | 0.7       | 0.30<br>1       | 1.628      | 0.407  |                 |
| H-Cholesterol     | 1.14<br>7 | 0.61<br>2.153 | 0.67            | 1.41      | 0.63<br>6 | 3.12<br>5       | 0.397     | 0.82<br>7 | 0.28<br>6       | 2.388      | 0.726  |                 |
| H-Triglycerides   | 0.90<br>1 | 0.58<br>1.391 | 0.639           | 0.67<br>6 | 0.36<br>9 | 1.23<br>7       | 0.204     | 1.27<br>3 | 0.67<br>5       | 2.401      | 0.457  |                 |
| L-HDL             | 1.05      | 0.73<br>3     | 1.504           | 0.79      | 1.06      | 0.59<br>7       | 1.88<br>1 | 0.844     | 1.03<br>8       | 0.64<br>3  | 1.677  | 0.879           |
| H-LDL             | 1.81      | 0.83<br>3.948 | 0.131           | 2.07<br>4 | 0.77<br>3 | 5.56<br>7       | 0.141     | 1.46<br>8 | 0.40<br>5       | 5.325      | 0.558  |                 |
| <b>rs16891339</b> |           |               |                 |           |           |                 |           |           |                 |            |        |                 |
| Clinical marker   | Total     |               |                 |           | Men       |                 |           | Women     |                 |            |        |                 |
|                   | OR        | 95% CI        | <i>p</i> -value | OR        | 95% CI    | <i>p</i> -value | OR        | 95% CI    | <i>p</i> -value | OR         | 95% CI | <i>p</i> -value |
| H-BMI             | 0.36<br>7 | 0.10<br>1.276 | 0.101           | 0.19<br>7 | 0.02<br>5 | 1.58            | 0.09      | 0.61<br>4 | 0.12<br>5       | 3.015      | 0.546  |                 |
| H- Waist          | 0.58<br>5 | 0.19<br>1.788 | 0.343           | 0.74<br>3 | 0.69<br>3 | 0.79<br>6       | 0.065     | 1.39<br>4 | 0.36<br>7       | 5.303      | 0.625  |                 |
| H-WHI             | 1.23      | 0.49<br>2     | 3.072           | 0.658     | 0.71<br>4 | 0.20<br>2       | 2.52<br>4 | 0.601     | 2.11<br>7       | 0.55<br>5  | 8.078  | 0.264           |
| H-WHR             | 0.96<br>1 | 0.38<br>2.425 | 0.933           | 0.55<br>4 | 0.14      | 2.18<br>6       | 0.394     | 1.68<br>7 | 0.44<br>4       | 6.408      | 0.44   |                 |
| H-%BF             | 0.46<br>7 | 0.17<br>1.245 | 0.12            | 0.37<br>7 | 0.09<br>5 | 1.48<br>9       | 0.15      | 0.57<br>5 | 0.14<br>1       | 2.345      | 0.437  |                 |
| H-Insulin         | 0.89<br>3 | 0.19<br>4.162 | 0.886           | 0.54<br>1 | 0.06<br>3 | 4.61<br>1       | 0.571     | 1.57<br>5 | 0.17<br>3       | 14.57      | 0.688  |                 |
| H-Glucose         | 0.97<br>1 | 0.95<br>0.984 | 0.449           | 0.96<br>8 | 0.94<br>7 | 0.98<br>9       | 0.564     | 0.97<br>4 | 0.95<br>6       | 0.992      | 0.622  |                 |
| H-HOMA            | 0.88<br>2 | 0.19<br>3.961 | 0.87            | 0.57<br>1 | 0.07      | 4.68<br>3       | 0.599     | 1.42<br>2 | 0.16<br>6       | 12.21<br>6 | 0.748  |                 |
| H-Cholesterol     | 0.91<br>9 | 0.89<br>0.941 | 0.196           | 0.89<br>5 | 0.86      | 0.93<br>2       | 0.282     | 0.94      | 0.91<br>4       | 0.967      | 0.452  |                 |
| H-Triglycerides   | 0.72<br>5 | 0.20<br>2.528 | 0.613           | 0.32<br>2 | 0.04      | 2.59            | 0.264     | 1.51<br>2 | 0.30<br>5       | 7.499      | 0.612  |                 |
| L-HDL             | 0.81<br>1 | 0.30<br>2.165 | 0.676           | 0.32<br>2 | 0.04      | 2.59            | 0.264     | 1.46<br>6 | 0.38<br>6       | 5.565      | 0.574  |                 |
| H-LDL             | 0.95<br>3 | 0.93<br>0.971 | 0.336           | 0.93<br>9 | 0.91<br>1 | 0.96<br>7       | 0.421     | 0.96<br>7 | 0.94<br>7       | 0.987      | 0.58   |                 |

ELOVL5

| rs41273878      |           |           |                 |       |           |                 |            |        |                 |           |            |                 |
|-----------------|-----------|-----------|-----------------|-------|-----------|-----------------|------------|--------|-----------------|-----------|------------|-----------------|
| Clinical marker | Total     |           |                 |       | Men       |                 |            | Women  |                 |           |            |                 |
|                 | OR        | 95% CI    | <i>p</i> -value | OR    | 95% CI    | <i>p</i> -value | OR         | 95% CI | <i>p</i> -value | OR        | 95% CI     | <i>p</i> -value |
| H-BMI           | 0.89<br>4 | 0.27<br>2 | 2.939           | 0.853 | 0.73<br>8 | 0.14<br>1       | 3.87<br>6  | 0.72   | 1.09<br>1       | 0.19<br>6 | 6.065      | 0.921           |
| H- Waist        | 0.66<br>5 | 0.18<br>1 | 2.444           | 0.537 | 0.5       | 0.05<br>9       | 4.22<br>5  | 0.518  | 0.86            | 0.15<br>5 | 4.773      | 0.864           |
| H-WHI           | 0.84<br>8 | 0.27<br>4 | 2.622           | 0.774 | 0.97<br>1 | 0.21<br>3       | 4.42<br>1  | 0.97   | 0.51<br>1       | 0.05<br>9 | 4.435      | 0.536           |
| H-WHR           | 0.82<br>6 | 0.26<br>7 | 2.555           | 0.74  | 0.52<br>2 | 0.1             | 2.73<br>8  | 0.437  | 1.33<br>6       | 0.26<br>5 | 6.728      | 0.726           |
| H-%BF           | 0.88<br>8 | 0.29<br>5 | 2.677           | 0.834 | 0.35<br>8 | 0.06<br>8       | 1.87<br>6  | 0.207  | 2.37<br>9       | 0.42<br>9 | 13.19<br>3 | 0.309           |
| H-Insulin       | 0.81<br>5 | 0.77<br>8 | 0.853           | 0.209 | 0.76<br>4 | 0.70<br>7       | 0.82<br>6  | 0.27   | 0.86            | 0.81<br>5 | 0.907      | 0.487           |
| H-Glucose       | 0.97<br>1 | 0.95<br>7 | 0.985           | 0.534 | 0.96<br>8 | 0.94<br>8       | 0.98<br>9  | 0.632  | 0.97<br>4       | 0.95<br>6 | 0.992      | 0.689           |
| H-HOMA          | 0.85<br>8 | 0.82<br>9 | 0.888           | 0.16  | 0.81<br>9 | 0.77<br>2       | 0.86<br>8  | 0.216  | 0.89<br>2       | 0.85<br>7 | 0.929      | 0.44            |
| H-Cholesterol   | 0.97<br>8 | 0.12<br>4 | 7.691           | 0.983 | 1.50<br>6 | 0.17<br>5       | 12.9<br>63 | 0.709  | 0.94<br>1       | 0.91<br>5 | 0.968      | 0.541           |
| H-Triglycerides | 2.50<br>5 | 0.80<br>5 | 7.799           | 0.102 | 4.17<br>6 | 0.91<br>2       | 19.1<br>27 | 0.047  | 1.04<br>5       | 0.11<br>9 | 9.139      | 0.968           |
| L-HDL           | 1.11<br>1 | 0.35<br>9 | 3.439           | 0.856 | 0.49<br>3 | 0.05<br>8       | 4.16<br>5  | 0.509  | 2.35<br>7       | 0.42<br>5 | 13.06<br>2 | 0.314           |
| H-LDL           | 1.79<br>5 | 0.22<br>5 | 14.33<br>2      | 0.577 | 2.76      | 0.31<br>3       | 24.3<br>29 | 0.342  | 0.96<br>7       | 0.94<br>7 | 0.987      | 0.653           |

  

| rs72938776      |            |           |                 |       |           |                 |            |        |                 |           |            |                 |
|-----------------|------------|-----------|-----------------|-------|-----------|-----------------|------------|--------|-----------------|-----------|------------|-----------------|
| Clinical marker | Total      |           |                 |       | Men       |                 |            | Women  |                 |           |            |                 |
|                 | OR         | 95% CI    | <i>p</i> -value | OR    | 95% CI    | <i>p</i> -value | OR         | 95% CI | <i>p</i> -value | OR        | 95% CI     | <i>p</i> -value |
| H-BMI           | 12.4<br>47 | 1.48<br>8 | 104.1<br>27     | 0.003 | 0.34<br>3 | 0.29<br>2       | 0.40<br>3  | 0.018  | 6.71<br>7       | 0.69      | 65.44<br>3 | 0.059           |
| H- Waist        | 3.02<br>2  | 0.67      | 13.64<br>2      | 0.132 | 6.23<br>2 | 0.55<br>7       | 69.7<br>84 | 0.091  | 1.73<br>9       | 0.24<br>2 | 12.51<br>6 | 0.58            |
| H-WHI           | 1.02<br>1  | 0.22<br>7 | 4.603           | 0.978 | 1.46<br>3 | 0.13<br>1       | 16.3<br>26 | 0.757  | 0.85<br>9       | 0.08<br>8 | 8.371      | 0.896           |
| H-WHR           | 8.12<br>9  | 0.97<br>2 | 67.95<br>1      | 0.022 | 2.67<br>8 | 0.24            | 29.8<br>72 | 0.407  | 0.42<br>2       | 0.37      | 0.482      | 0.02            |
| H-%BF           | 6.35       | 0.76      | 53.08<br>8      | 0.051 | 1.84<br>5 | 0.16<br>5       | 20.5<br>88 | 0.615  | 0.45<br>4       | 0.4       | 0.515      | 0.029           |
| H-Insulin       | 6.97<br>3  | 1.14<br>5 | 42.46<br>9      | 0.015 | 0.22<br>3 | 0.17<br>2       | 0.29       | 0.009  | 3.18<br>3       | 0.28      | 36.2       | 0.327           |
| H-Glucose       | 0.97<br>1  | 0.95<br>8 | 0.985           | 0.65  | 0.96<br>8 | 0.94<br>8       | 0.98<br>9  | 0.756  | 0.97<br>4       | 0.95<br>6 | 0.992      | 0.745           |
| H-HOMA          | 1.24<br>5  | 0.14<br>3 | 10.80<br>7      | 0.842 | 2.36<br>4 | 0.21            | 26.6<br>45 | 0.475  | 0.89<br>3       | 0.85<br>8 | 0.929      | 0.551           |
| H-Cholesterol   | 1.97<br>8  | 0.23<br>3 | 16.78<br>5      | 0.525 | 0.89<br>8 | 0.86<br>4       | 0.93<br>4  | 0.562  | 5.68<br>6       | 0.56<br>1 | 57.59<br>7 | 0.098           |
| H-Triglycerides | 1.57<br>3  | 0.30<br>2 | 8.209           | 0.588 | 1.50<br>7 | 0.13<br>5       | 16.8<br>71 | 0.739  | 1.75<br>5       | 0.17<br>9 | 17.22<br>2 | 0.626           |

|                        |              |               |            |                |            |               |            |                |              |               |             |                |
|------------------------|--------------|---------------|------------|----------------|------------|---------------|------------|----------------|--------------|---------------|-------------|----------------|
| L-HDL                  | 2.39         | 0.53          | 10.77<br>9 | 0.243          | 6.14<br>3  | 0.54<br>9     | 68.7<br>76 | 0.094          | 1.16<br>2    | 0.16<br>2     | 8.355       | 0.882          |
| H-LDL                  | 3.62<br>8    | 0.42<br>1     | 31.24<br>7 | 0.21           | 0.94       | 0.91<br>3     | 0.96<br>8  | 0.664          | 11.0<br>37   | 1.04<br>4     | 116.6<br>96 | 0.013          |
| <b>rs36054518</b>      |              |               |            |                |            |               |            |                |              |               |             |                |
|                        | <b>Total</b> |               |            |                | <b>Men</b> |               |            |                | <b>Women</b> |               |             |                |
| <b>Clinical marker</b> | <b>OR</b>    | <b>95% CI</b> |            | <b>p-value</b> | <b>OR</b>  | <b>95% CI</b> |            | <b>p-value</b> | <b>OR</b>    | <b>95% CI</b> |             | <b>p-value</b> |
| H-BMI                  | 0.76<br>7    | 0.27          | 2.184      | 0.619          | 0.52<br>1  | 0.10<br>6     | 2.55<br>9  | 0.416          | 1.08<br>7    | 0.26<br>6     | 4.442       | 0.908          |
| H- Waist               | 0.62<br>9    | 0.20<br>4     | 1.936      | 0.416          | 0.74<br>5  | 0.69<br>5     | 0.79<br>8  | 0.081          | 1.38<br>7    | 0.36<br>5     | 5.275       | 0.631          |
| H-WHI                  | 0.86         | 0.32<br>9     | 2.25       | 0.758          | 0.57<br>3  | 0.15<br>1     | 2.17<br>9  | 0.41           | 1.29<br>5    | 0.31<br>7     | 5.299       | 0.719          |
| H-WHR                  | 0.83<br>7    | 0.32          | 2.191      | 0.718          | 0.36<br>8  | 0.07<br>5     | 1.80<br>5  | 0.202          | 1.67<br>7    | 0.44<br>1     | 6.37        | 0.445          |
| H-%BF                  | 1.04<br>4    | 0.40<br>8     | 2.671      | 0.928          | 0.44<br>7  | 0.10<br>9     | 1.82<br>4  | 0.252          | 2.41<br>9    | 0.59<br>3     | 9.861       | 0.206          |
| H-Insulin              | 2.30<br>8    | 0.67<br>7     | 7.87       | 0.171          | 3.43<br>2  | 0.47          | 25.0<br>68 | 0.199          | 2.13<br>8    | 0.41<br>2     | 11.10<br>4  | 0.358          |
| H-Glucose              | 0.97<br>1    | 0.95<br>7     | 0.985      | 0.462          | 0.96<br>8  | 0.94<br>7     | 0.98<br>9  | 0.586          | 0.97<br>3    | 0.95<br>5     | 0.992       | 0.622          |
| H-HOMA                 | 1.24<br>9    | 0.35<br>3     | 4.422      | 0.73           | 0.57<br>4  | 0.07          | 4.70<br>6  | 0.602          | 2.50<br>2    | 0.49<br>6     | 12.61<br>7  | 0.252          |
| H-Cholesterol          | 0.69<br>9    | 0.09<br>1     | 5.376      | 0.73           | 0.89<br>6  | 0.86<br>1     | 0.93<br>3  | 0.309          | 2.22<br>7    | 0.26<br>2     | 18.90<br>5  | 0.453          |
| H-Triglycerides        | 0.22<br>3    | 0.02<br>9     | 1.693      | 0.113          | 0.74<br>2  | 0.69<br>2     | 0.79<br>5  | 0.079          | 0.64<br>3    | 0.07<br>9     | 5.256       | 0.679          |
| L-HDL                  | 1.13<br>8    | 0.43<br>5     | 2.98       | 0.793          | 0.85<br>3  | 0.17<br>3     | 4.20<br>3  | 0.846          | 1.47<br>6    | 0.38<br>9     | 5.606       | 0.566          |
| H-LDL                  | 2.89<br>6    | 0.63          | 13.31<br>6 | 0.0154         | 0.93<br>9  | 0.91<br>1     | 0.96<br>8  | 0.447          | 12           | 2.10<br>4     | 68.44<br>2  | 0              |
| <b>rs72940713</b>      |              |               |            |                |            |               |            |                |              |               |             |                |
|                        | <b>Total</b> |               |            |                | <b>Men</b> |               |            |                | <b>Women</b> |               |             |                |
| <b>Clinical marker</b> | <b>OR</b>    | <b>95% CI</b> |            | <b>p-value</b> | <b>OR</b>  | <b>95% CI</b> |            | <b>p-value</b> | <b>OR</b>    | <b>95% CI</b> |             | <b>p-value</b> |
| H-BMI                  | 7.32         | 1.50<br>6     | 35.57<br>9 | 0.004          | 0.34<br>1  | 0.28<br>9     | 0.40<br>1  | 0.006          | 3.37<br>9    | 0.55<br>5     | 20.56<br>9  | 0.163          |
| H- Waist               | 2.83<br>5    | 0.75<br>2     | 10.68<br>2 | 0.108          | 3.10<br>1  | 0.42<br>9     | 22.4<br>33 | 0.24           | 2.61<br>8    | 0.43<br>1     | 15.91       | 0.28           |
| H-WHI                  | 1.08<br>7    | 0.28<br>9     | 4.09       | 0.902          | 2.20<br>9  | 0.22<br>7     | 21.4<br>94 | 0.486          | 0.63<br>8    | 0.07          | 5.792       | 0.689          |
| H-WHR                  | 4.76<br>6    | 0.98<br>2     | 23.14<br>1 | 0.033          | 4.05       | 0.41<br>6     | 39.4<br>16 | 0.194          | 5.49<br>2    | 0.60<br>7     | 49.73       | 0.09           |
| H-%BF                  | 8.56<br>1    | 1.06<br>4     | 68.89<br>9 | 0.016          | 2.78<br>7  | 0.28<br>6     | 27.1<br>31 | 0.359          | 0.45         | 0.39<br>6     | 0.511       | 0.014          |
| H-Insulin              | 6.95<br>3    | 1.14<br>2     | 42.34<br>6 | 0.015          | 0.22<br>3  | 0.17<br>2     | 0.29       | 0.009          | 3.16<br>7    | 0.27<br>8     | 36.01<br>1  | 0.33           |
| H-Glucose              | 0.97<br>1    | 0.95<br>8     | 0.985      | 0.606          | 0.96<br>8  | 0.94<br>8     | 0.98<br>9  | 0.719          | 0.97<br>4    | 0.95<br>6     | 0.992       | 0.715          |
| H-HOMA                 | 1.24<br>3    | 0.14<br>3     | 10.78<br>4 | 0.844          | 2.36<br>4  | 0.21          | 26.6<br>45 | 0.475          | 0.89<br>3    | 0.85<br>8     | 0.929       | 0.55           |
| H-Cholesterol          | 1.47<br>6    | 0.18<br>1     | 12.05<br>6 | 0.715          | 0.89<br>8  | 0.86<br>3     | 0.93<br>4  | 0.502          | 4.23<br>5    | 0.44<br>9     | 39.99<br>3  | 0.172          |

|                        |              |               |       |                |            |               |            |                |              |               |            |                |
|------------------------|--------------|---------------|-------|----------------|------------|---------------|------------|----------------|--------------|---------------|------------|----------------|
| <b>H-Triglycerides</b> | 1.97<br>5    | 0.48<br>7     | 8.012 | 0.333          | 1          | 0.10<br>2     | 9.76<br>7  | 1              | 3.56<br>9    | 0.58<br>1     | 21.93<br>2 | 0.144          |
| <b>L-HDL</b>           | 1.43<br>3    | 0.38<br>1     | 5.395 | 0.593          | 3.05<br>7  | 0.42<br>3     | 22.1<br>08 | 0.246          | 0.77<br>5    | 0.12<br>8     | 4.706      | 0.782          |
| <b>H-LDL</b>           | 0.95<br>6    | 0.93<br>9     | 0.973 | 0.52           | 0.94       | 0.91<br>3     | 0.96<br>8  | 0.615          | 0.97         | 0.95<br>2     | 0.99       | 0.698          |
| <b>rs114271869</b>     |              |               |       |                |            |               |            |                |              |               |            |                |
|                        | <b>Total</b> |               |       |                | <b>Men</b> |               |            |                | <b>Women</b> |               |            |                |
| <b>Clinical marker</b> | <b>OR</b>    | <b>95% CI</b> |       | <b>p-value</b> | <b>OR</b>  | <b>95% CI</b> |            | <b>p-value</b> | <b>OR</b>    | <b>95% CI</b> |            | <b>p-value</b> |
| <b>H-BMI</b>           | 0.89<br>6    | 0.27<br>2     | 2.947 | 0.857          | 1.11<br>3  | 0.26          | 4.75<br>6  | 0.886          | 0.54<br>6    | 0.06          | 4.95       | 0.586          |
| <b>H- Waist</b>        | 0.99<br>6    | 0.30<br>3     | 3.276 | 0.994          | 1.01       | 0.19<br>9     | 5.11<br>9  | 0.991          | 1.16<br>4    | 0.19<br>1     | 7.071      | 0.87           |
| <b>H-WHI</b>           | 1.17<br>2    | 0.38<br>9     | 3.531 | 0.778          | 0.72<br>7  | 0.17<br>8     | 2.96<br>5  | 0.656          | 1.73         | 0.28<br>4     | 10.53<br>8 | 0.549          |
| <b>H-WHR</b>           | 0.83<br>2    | 0.26<br>9     | 2.576 | 0.751          | 0.79<br>7  | 0.18<br>7     | 3.4        | 0.759          | 0.89<br>1    | 0.14<br>7     | 5.408      | 0.9            |
| <b>H-%BF</b>           | 0.64<br>8    | 0.20<br>9     | 2.005 | 0.449          | 0.54<br>4  | 0.12<br>7     | 2.32<br>4  | 0.407          | 0.78<br>2    | 0.12<br>9     | 4.75       | 0.79           |
| <b>H-Insulin</b>       | 0.64<br>4    | 0.07<br>8     | 5.311 | 0.681          | 0.65<br>3  | 0.07<br>4     | 5.73<br>8  | 0.701          | 0.86<br>4    | 0.82          | 0.911      | 0.577          |
| <b>H-Glucose</b>       | 0.97<br>1    | 0.95<br>7     | 0.985 | 0.533          | 0.96<br>8  | 0.94<br>7     | 0.98<br>9  | 0.607          | 0.97<br>4    | 0.95<br>6     | 0.992      | 0.715          |
| <b>H-HOMA</b>          | 0.86         | 0.83<br>1     | 0.89  | 0.163          | 0.81<br>8  | 0.77<br>1     | 0.86<br>7  | 0.215          | 0.89<br>5    | 0.86<br>1     | 0.932      | 0.447          |
| <b>H-Cholesterol</b>   | 0.92         | 0.89<br>8     | 0.942 | 0.287          | 0.89<br>6  | 0.86<br>1     | 0.93<br>3  | 0.338          | 0.94<br>1    | 0.91<br>5     | 0.968      | 0.577          |
| <b>H-Triglycerides</b> | 1.17<br>2    | 0.31<br>8     | 4.327 | 0.812          | 0.99<br>5  | 0.19<br>6     | 5.04<br>4  | 0.995          | 1.30<br>6    | 0.14<br>3     | 11.93<br>6 | 0.813          |
| <b>L-HDL</b>           | 2.91<br>4    | 0.94<br>1     | 9.022 | 0.053          | 5.27<br>4  | 1.22<br>8     | 22.6<br>51 | 0.013          | 1.76<br>8    | 0.29<br>1     | 10.73      | 0.532          |
| <b>H-LDL</b>           | 0.95<br>4    | 0.93<br>7     | 0.971 | 0.428          | 0.93<br>9  | 0.91<br>1     | 0.96<br>8  | 0.473          | 0.96<br>7    | 0.94<br>7     | 0.987      | 0.682          |
| <b>rs 2073040</b>      |              |               |       |                |            |               |            |                |              |               |            |                |
|                        | <b>Total</b> |               |       |                | <b>Men</b> |               |            |                | <b>Women</b> |               |            |                |
| <b>Clinical marker</b> | <b>OR</b>    | <b>95% CI</b> |       | <b>p-value</b> | <b>OR</b>  | <b>95% CI</b> |            | <b>p-value</b> | <b>OR</b>    | <b>95% CI</b> |            | <b>p-value</b> |
| <b>H-BMI</b>           | 0.96         | 0.65<br>4     | 1.409 | 0.837          | 1.26<br>9  | 0.72<br>9     | 2.20<br>8  | 0.402          | 0.73<br>4    | 0.43          | 1.252      | 0.257          |
| <b>H- Waist</b>        | 0.84<br>6    | 0.57<br>7     | 1.24  | 0.393          | 0.91<br>8  | 0.50<br>8     | 1.65<br>9  | 0.778          | 0.79<br>8    | 0.47<br>8     | 1.332      | 0.389          |
| <b>H-WHI</b>           | 0.88         | 0.61<br>2     | 1.264 | 0.489          | 0.95<br>5  | 0.56<br>5     | 1.61<br>5  | 0.865          | 0.76<br>7    | 0.44<br>5     | 1.321      | 0.339          |
| <b>H-WHR</b>           | 0.88<br>6    | 0.61<br>6     | 1.274 | 0.513          | 1.06<br>6  | 0.63<br>2     | 1.79<br>8  | 0.813          | 0.74<br>5    | 0.44<br>9     | 1.235      | 0.254          |
| <b>H-%BF</b>           | 0.88<br>6    | 0.61<br>2     | 1.281 | 0.52           | 1.02<br>1  | 0.60<br>3     | 1.72<br>9  | 0.937          | 0.77<br>3    | 0.46          | 1.298      | 0.331          |
| <b>H-Insulin</b>       | 1.27<br>5    | 0.72<br>2     | 2.252 | 0.403          | 0.86<br>9  | 0.41<br>5     | 1.82<br>1  | 0.712          | 2.01<br>7    | 0.78<br>6     | 5.174      | 0.139          |
| <b>H-Glucose</b>       | 1.30<br>6    | 0.42          | 4.066 | 0.644          | 0.78<br>2  | 0.19<br>1     | 3.20<br>4  | 0.733          | 2.88<br>8    | 0.35          | 23.83<br>5 | 0.305          |
| <b>H-HOMA</b>          | 1.10<br>1    | 0.63<br>6     | 1.908 | 0.732          | 1.16<br>2  | 0.55<br>1     | 2.45       | 0.695          | 0.99<br>7    | 0.43<br>8     | 2.268      | 0.994          |

|                        |                   |               |                       |           |               |                       |           |               |                       |           |               |                       |
|------------------------|-------------------|---------------|-----------------------|-----------|---------------|-----------------------|-----------|---------------|-----------------------|-----------|---------------|-----------------------|
| <b>H-Cholesterol</b>   | 1.75<br>4         | 0.82<br>8     | 3.713                 | 0.138     | 1.57<br>6     | 0.61<br>7             | 4.02<br>8 | 0.34          | 2.09<br>6             | 0.59<br>1 | 7.432         | 0.244                 |
| <b>H-Triglycerides</b> | 0.79<br>9         | 0.51<br>9     | 1.232                 | 0.311     | 0.78<br>9     | 0.44<br>1             | 1.41      | 0.424         | 0.80<br>2             | 0.41<br>5 | 1.548         | 0.512                 |
| <b>L-HDL</b>           | 0.68<br>6         | 0.47<br>5     | 0.992                 | 0.045     | 0.60<br>9     | 0.34<br>4             | 1.07<br>8 | 0.088         | 0.73<br>4             | 0.44<br>4 | 1.212         | 0.227                 |
| <b>H-LDL</b>           | 1.08<br>7         | 0.44<br>8     | 2.636                 | 0.854     | 1.3           | 0.41<br>1             | 4.11<br>3 | 0.656         | 0.80<br>2             | 0.19<br>6 | 3.282         | 0.759                 |
| <b>rs 9370194</b>      |                   |               |                       |           |               |                       |           |               |                       |           |               |                       |
|                        | <b>Total</b>      |               |                       |           | <b>Men</b>    |                       |           |               | <b>Women</b>          |           |               |                       |
| <b>Clinical marker</b> | <b>OR</b>         | <b>95% CI</b> | <b><i>p</i>-value</b> | <b>OR</b> | <b>95% CI</b> | <b><i>p</i>-value</b> | <b>OR</b> | <b>95% CI</b> | <b><i>p</i>-value</b> | <b>OR</b> | <b>95% CI</b> | <b><i>p</i>-value</b> |
| <b>H-BMI</b>           | 0.93<br>4         | 0.63<br>1     | 1.383                 | 0.735     | 0.72          | 0.41<br>7             | 1.24<br>4 | 0.24          | 1.21<br>7             | 0.69<br>1 | 2.142         | 0.498                 |
| <b>H- Waist</b>        | 0.75<br>1         | 0.50<br>1     | 1.127                 | 0.166     | 0.74<br>1     | 0.40<br>2             | 1.36<br>4 | 0.337         | 0.82<br>4             | 0.47<br>3 | 1.433         | 0.494                 |
| <b>H-WHI</b>           | 0.91<br>3         | 0.63<br>1     | 1.321                 | 0.629     | 0.98<br>6     | 0.59<br>1             | 1.64<br>6 | 0.958         | 0.62<br>2             | 0.33<br>4 | 1.161         | 0.135                 |
| <b>H-WHR</b>           | 0.79<br>4         | 0.54<br>7     | 1.152                 | 0.225     | 0.73<br>1     | 0.43<br>5             | 1.22<br>7 | 0.236         | 0.87<br>3             | 0.50<br>9 | 1.496         | 0.622                 |
| <b>H-%BF</b>           | 0.79              | 0.54<br>3     | 1.15                  | 0.219     | 0.53<br>7     | 0.31<br>9             | 0.90<br>7 | 0.019         | 1.16<br>3             | 0.67<br>3 | 2.01          | 0.589                 |
| <b>H-Insulin</b>       | 1.46<br>3         | 0.84<br>8     | 2.524                 | 0.17      | 1.58<br>6     | 0.77<br>8             | 3.23<br>4 | 0.205         | 1.19<br>3             | 0.49<br>7 | 2.86          | 0.695                 |
| <b>H-Glucose</b>       | 0.78<br>8         | 0.25<br>3     | 2.453                 | 0.681     | 1.09<br>4     | 0.26<br>7             | 4.47<br>9 | 0.901         | 0.42<br>9             | 0.05<br>2 | 3.543         | 0.42                  |
| <b>H-HOMA</b>          | 1.12<br>6         | 0.65<br>6     | 1.931                 | 0.667     | 0.83<br>4     | 0.40<br>2             | 1.72<br>7 | 0.626         | 1.53<br>3             | 0.68<br>4 | 3.439         | 0.298                 |
| <b>H-Cholesterol</b>   | 1.01<br>7         | 0.52<br>1     | 1.986                 | 0.961     | 0.42<br>2     | 0.15<br>5             | 1.14<br>5 | 0.083         | 2.92<br>6             | 1.08<br>5 | 7.892         | 0.027                 |
| <b>H-Triglycerides</b> | 1.07<br>8         | 0.69<br>2     | 1.681                 | 0.739     | 0.89          | 0.49<br>5             | 1.6       | 0.699         | 1.27<br>5             | 0.64<br>2 | 2.529         | 0.489                 |
| <b>L-HDL</b>           | 1.16              | 0.79<br>7     | 1.687                 | 0.439     | 1.25<br>9     | 0.71<br>3             | 2.22<br>6 | 0.429         | 1.28<br>8             | 0.75<br>9 | 2.187         | 0.35                  |
| <b>H-LDL</b>           | 0.89<br>8         | 0.37<br>2     | 2.166                 | 0.811     | 0.27<br>4     | 0.06<br>1             | 1.22<br>7 | 0.072         | 3.20<br>6             | 0.90<br>1 | 11.40<br>6    | 0.059                 |
| <b>ELOVL6</b>          |                   |               |                       |           |               |                       |           |               |                       |           |               |                       |
|                        | <b>rs11098065</b> |               |                       |           |               |                       |           |               |                       |           |               |                       |
|                        | <b>Total</b>      |               |                       |           | <b>Men</b>    |                       |           |               | <b>Women</b>          |           |               |                       |
| <b>Clinical marker</b> | <b>OR</b>         | <b>95% CI</b> | <b><i>p</i>-value</b> | <b>OR</b> | <b>95% CI</b> | <b><i>p</i>-value</b> | <b>OR</b> | <b>95% CI</b> | <b><i>p</i>-value</b> | <b>OR</b> | <b>95% CI</b> | <b><i>p</i>-value</b> |
| <b>H-BMI</b>           | 0.90<br>3         | 0.63<br>6     | 1.282                 | 0.57      | 1.05<br>1     | 0.64<br>6             | 1.72<br>6 | 0.844         | 0.77<br>8             | 0.47<br>3 | 1.279         | 0.323                 |
| <b>H- Waist</b>        | 1.04<br>7         | 0.73<br>7     | 1.489                 | 0.798     | 1.08<br>8     | 0.63<br>3             | 1.87<br>2 | 0.76          | 1.01<br>8             | 0.63<br>7 | 1.627         | 0.942                 |
| <b>H-WHI</b>           | 1.15<br>8         | 0.83<br>3     | 1.61                  | 0.384     | 1.09<br>4     | 0.67<br>9             | 1.76<br>3 | 0.712         | 1.27<br>5             | 0.77<br>3 | 2.106         | 0.343                 |
| <b>H-WHR</b>           | 1.06              | 0.76<br>2     | 1.475                 | 0.73      | 1.12<br>6     | 0.70<br>1             | 1.81<br>1 | 0.624         | 1.00<br>1             | 0.63<br>2 | 1.585         | 0.996                 |
| <b>H-%BF</b>           | 0.90<br>1         | 0.64<br>6     | 1.257                 | 0.541     | 1.24<br>4     | 0.76<br>8             | 2.01<br>7 | 0.376         | 0.67<br>2             | 0.42<br>2 | 1.071         | 0.095                 |
| <b>H-Insulin</b>       | 0.49<br>9         | 0.28<br>9     | 0.861                 | 0.011     | 0.43<br>6     | 0.21<br>6             | 0.90<br>6 | 0.024         | 0.57<br>8             | 0.25<br>3 | 1.321         | 0.191                 |

|                        |              |               |            |                |            |               |            |                |              |               |       |                |
|------------------------|--------------|---------------|------------|----------------|------------|---------------|------------|----------------|--------------|---------------|-------|----------------|
| <b>H-Glucose</b>       | 0.55<br>8    | 0.19<br>4     | 1.604      | 0.273          | 0.67<br>4  | 0.16<br>5     | 2.74<br>9  | 0.581          | 0.44<br>4    | 0.08<br>8     | 2.233 | 0.313          |
| <b>H-HOMA</b>          | 0.72<br>5    | 0.43<br>8     | 1.2        | 0.21           | 0.65<br>6  | 0.33<br>3     | 1.29<br>1  | 0.222          | 0.83<br>3    | 0.38<br>8     | 1.786 | 0.639          |
| <b>H-Cholesterol</b>   | 1.21<br>5    | 0.66<br>9     | 2.209      | 0.523          | 1.78<br>2  | 0.82<br>3     | 3.85<br>9  | 0.14           | 0.66<br>3    | 0.24<br>2     | 1.814 | 0.422          |
| <b>H-Triglycerides</b> | 0.93         | 0.62<br>1     | 1.394      | 0.727          | 1.12<br>4  | 0.65<br>6     | 1.92<br>5  | 0.673          | 0.72<br>5    | 0.38<br>7     | 1.358 | 0.316          |
| <b>L-HDL</b>           | 0.68<br>6    | 0.48<br>7     | 0.966      | 0.031          | 0.82<br>8  | 0.48          | 1.42<br>9  | 0.499          | 0.58<br>2    | 0.36<br>9     | 0.919 | 0.02           |
| <b>H-LDL</b>           | 1.09<br>2    | 0.50<br>2     | 2.375      | 0.824          | 1.22<br>7  | 0.45<br>9     | 3.27<br>8  | 0.684          | 0.90<br>1    | 0.24<br>9     | 3.259 | 0.874          |
| <b>rs17041284</b>      |              |               |            |                |            |               |            |                |              |               |       |                |
|                        | <b>Total</b> |               |            |                | <b>Men</b> |               |            |                | <b>Women</b> |               |       |                |
| <b>Clinical marker</b> | <b>OR</b>    | <b>95% CI</b> |            | <b>p-value</b> | <b>OR</b>  | <b>95% CI</b> |            | <b>p-value</b> | <b>OR</b>    | <b>95% CI</b> |       | <b>p-value</b> |
| <b>H-BMI</b>           | 1.49<br>4    | 0.59<br>1     | 3.777      | 0.394          | 1.57<br>8  | 0.46<br>9     | 5.30<br>7  | 0.459          | 1.33<br>2    | 0.31<br>2     | 5.693 | 0.699          |
| <b>H-Waist</b>         | 1.52         | 0.61<br>1     | 3.784      | 0.366          | 1.78<br>3  | 0.50<br>6     | 6.27<br>7  | 0.364          | 1.40<br>7    | 0.37          | 5.353 | 0.616          |
| <b>H-WHI</b>           | 1.38<br>2    | 0.56<br>6     | 3.372      | 0.477          | 0.87       | 0.25<br>9     | 2.91<br>9  | 0.822          | 2.14<br>3    | 0.56<br>2     | 8.179 | 0.256          |
| <b>H-WHR</b>           | 1.20<br>6    | 0.48<br>3     | 3.014      | 0.688          | 1.10<br>9  | 0.33          | 3.72       | 0.868          | 1.34<br>9    | 0.33<br>1     | 5.498 | 0.676          |
| <b>H-%BF</b>           | 0.93<br>7    | 0.37<br>5     | 2.341      | 0.889          | 0.75<br>5  | 0.22<br>5     | 2.53<br>6  | 0.65           | 1.18<br>3    | 0.29          | 4.824 | 0.815          |
| <b>H-Insulin</b>       | 1.14<br>4    | 0.31<br>5     | 4.156      | 0.839          | 0.82<br>4  | 0.16<br>9     | 4.02<br>3  | 0.812          | 1.62<br>9    | 0.17<br>6     | 15.09 | 0.666          |
| <b>H-Glucose</b>       | 1.84<br>9    | 0.23<br>3     | 14.67<br>1 | 0.056          | 3.36<br>3  | 0.38<br>3     | 29.5<br>26 | 0.248          | 0.97<br>3    | 0.95<br>5     | 0.992 | 0.622          |
| <b>H-HOMA</b>          | 0.78<br>1    | 0.17<br>6     | 3.467      | 0.745          | 0.45<br>5  | 0.05<br>7     | 3.64<br>3  | 0.449          | 1.47<br>1    | 0.17<br>1     | 12.65 | 0.725          |
| <b>H-Cholesterol</b>   | 1.31<br>6    | 0.29<br>6     | 5.852      | 0.718          | 2.05<br>8  | 0.42<br>3     | 10.0<br>17 | 0.364          | 0.94         | 0.91<br>4     | 0.967 | 0.451          |
| <b>H-Triglycerides</b> | 2.19<br>2    | 0.85<br>5     | 5.618      | 0.095          | 2.61<br>2  | 0.77<br>2     | 8.83<br>2  | 0.111          | 1.54<br>4    | 0.31<br>1     | 7.663 | 0.594          |
| <b>L-HDL</b>           | 1.19<br>5    | 0.48<br>1     | 2.97       | 0.702          | 0.65<br>7  | 0.13<br>9     | 3.11<br>5  | 0.596          | 2.39<br>4    | 0.58<br>8     | 9.751 | 0.211          |
| <b>H-LDL</b>           | 1.11<br>7    | 0.14<br>4     | 8.671      | 0.916          | 1.63<br>1  | 0.19<br>6     | 13.5<br>45 | 0.649          | 0.96<br>7    | 0.94<br>7     | 0.987 | 0.58           |
| <b>rs7662161</b>       |              |               |            |                |            |               |            |                |              |               |       |                |
|                        | <b>Total</b> |               |            |                | <b>Men</b> |               |            |                | <b>Women</b> |               |       |                |
| <b>Clinical marker</b> | <b>OR</b>    | <b>95% CI</b> |            | <b>p-value</b> | <b>OR</b>  | <b>95% CI</b> |            | <b>p-value</b> | <b>OR</b>    | <b>95% CI</b> |       | <b>p-value</b> |
| <b>H-BMI</b>           | 0.90<br>3    | 0.63<br>6     | 1.283      | 0.569          | 0.87<br>5  | 0.53<br>2     | 1.44       | 0.601          | 0.93         | 0.56<br>7     | 1.526 | 0.776          |
| <b>H-Waist</b>         | 0.94<br>6    | 0.66<br>4     | 1.348      | 0.758          | 0.60<br>5  | 0.34<br>4     | 1.06<br>5  | 0.081          | 1.30<br>5    | 0.81<br>6     | 2.088 | 0.268          |
| <b>H-WHI</b>           | 1.08<br>1    | 0.77<br>6     | 1.504      | 0.646          | 0.93<br>8  | 0.58<br>3     | 1.51<br>1  | 0.794          | 1.27<br>8    | 0.77<br>3     | 2.114 | 0.34           |
| <b>H-WHR</b>           | 0.97<br>8    | 0.70<br>2     | 1.362      | 0.894          | 0.84<br>1  | 0.52<br>2     | 1.35<br>6  | 0.479          | 1.12<br>5    | 0.71          | 1.784 | 0.617          |
| <b>H-%BF</b>           | 0.77<br>8    | 0.55<br>7     | 1.087      | 0.142          | 0.8        | 0.49<br>5     | 1.29<br>2  | 0.362          | 0.75         | 0.46<br>9     | 1.199 | 0.23           |

|                        |              |               |                |           |               |                |            |               |                |           |            |       |
|------------------------|--------------|---------------|----------------|-----------|---------------|----------------|------------|---------------|----------------|-----------|------------|-------|
| <b>H-Insulin</b>       | 0.76<br>7    | 0.46<br>2     | 1.274          | 0.306     | 0.76<br>4     | 0.38<br>7      | 1.50<br>7  | 0.439         | 0.78<br>6      | 0.36<br>1 | 1.708      | 0.544 |
| <b>H-Glucose</b>       | 0.78<br>4    | 0.28<br>6     | 2.149          | 0.636     | 0.70<br>9     | 0.17<br>4      | 2.89<br>2  | 0.631         | 0.87<br>3      | 0.20<br>5 | 3.721      | 0.855 |
| <b>H-HOMA</b>          | 0.75<br>7    | 0.45<br>7     | 1.253          | 0.279     | 0.73          | 0.37<br>4      | 1.42<br>4  | 0.356         | 0.77<br>9      | 0.35<br>9 | 1.693      | 0.529 |
| <b>H-Cholesterol</b>   | 0.59         | 0.30<br>9     | 1.128          | 0.108     | 0.34          | 0.13<br>4      | 0.86<br>3  | 0.018         | 1.18           | 0.45<br>2 | 3.077      | 0.736 |
| <b>H-Triglycerides</b> | 0.81<br>1    | 0.53<br>8     | 1.222          | 0.316     | 0.81<br>8     | 0.47<br>2      | 1.41<br>5  | 0.473         | 0.79<br>2      | 0.42<br>3 | 1.483      | 0.467 |
| <b>L-HDL</b>           | 0.91<br>7    | 0.65<br>2     | 1.289          | 0.619     | 0.81<br>8     | 0.47<br>2      | 1.41<br>5  | 0.473         | 0.99<br>3      | 0.63      | 1.565      | 0.977 |
| <b>H-LDL</b>           | 0.33<br>1    | 0.12<br>3     | 0.89           | 0.022     | 0.17<br>7     | 0.04           | 0.78<br>9  | 0.011         | 0.72<br>4      | 0.17<br>8 | 2.948      | 0.652 |
| <b>77958351</b>        |              |               |                |           |               |                |            |               |                |           |            |       |
|                        | <b>Total</b> |               |                |           | <b>Men</b>    |                |            |               | <b>Women</b>   |           |            |       |
| <b>Clinical marker</b> | <b>OR</b>    | <b>95% CI</b> | <b>p-value</b> | <b>OR</b> | <b>95% CI</b> | <b>p-value</b> | <b>OR</b>  | <b>95% CI</b> | <b>p-value</b> |           |            |       |
| <b>H-BMI</b>           | 1.58<br>9    | 0.58<br>3     | 4.332          | 0.363     | 1.50<br>7     | 0.39<br>5      | 5.74<br>6  | 0.547         | 1.65<br>5      | 0.36<br>3 | 7.544      | 0.513 |
| <b>H- Waist</b>        | 1.58<br>6    | 0.59<br>4     | 4.234          | 0.354     | 1.54<br>4     | 0.37<br>6      | 6.34<br>1  | 0.545         | 1.75<br>2      | 0.43      | 7.147      | 0.43  |
| <b>H-WHI</b>           | 1.55<br>1    | 0.59          | 4.077          | 0.371     | 0.90<br>8     | 0.23<br>9      | 3.45<br>6  | 0.888         | 2.65<br>9      | 0.65      | 10.87<br>8 | 0.159 |
| <b>H-WHR</b>           | 1.33<br>7    | 0.49<br>5     | 3.613          | 0.566     | 1.06<br>2     | 0.27<br>9      | 4.04<br>1  | 0.93          | 1.79<br>5      | 0.39<br>5 | 8.163      | 0.444 |
| <b>H-%BF</b>           | 1.04         | 0.38<br>5     | 2.811          | 0.938     | 0.72<br>6     | 0.19<br>1      | 2.76<br>2  | 0.638         | 1.57<br>6      | 0.34<br>6 | 7.167      | 0.555 |
| <b>H-Insulin</b>       | 0.74<br>2    | 0.16<br>3     | 3.386          | 0.7       | 0.40<br>3     | 0.04<br>9      | 3.30<br>8  | 0.385         | 1.57<br>5      | 0.17      | 14.57<br>3 | 0.688 |
| <b>H-Glucose</b>       | 2.21<br>1    | 0.27<br>6     | 17.70<br>6     | 0.444     | 4.23<br>4     | 0.47<br>2      | 38.0<br>07 | 0.163         | 0.97<br>4      | 0.95<br>6 | 0.992      | 0.643 |
| <b>H-HOMA</b>          | 0.43<br>6    | 0.05<br>7     | 3.366          | 0.414     | 0.81<br>7     | 0.77           | 0.86<br>7  | 0.159         | 1.71<br>3      | 0.19<br>4 | 15.15<br>8 | 0.626 |
| <b>H-Cholesterol</b>   | 1.59<br>1    | 0.35<br>3     | 7.177          | 0.543     | 2.66<br>7     | 0.52<br>7      | 13.4<br>86 | 0.22          | 0.94<br>1      | 0.91<br>4 | 0.968      | 0.479 |
| <b>H-Triglycerides</b> | 2.19<br>1    | 0.79<br>4     | 6.048          | 0.121     | 2.48<br>2     | 0.64<br>8      | 9.50<br>8  | 0.172         | 1.77<br>1      | 0.34<br>7 | 9.036      | 0.488 |
| <b>L-HDL</b>           | 1.24<br>9    | 0.46<br>9     | 3.331          | 0.656     | 0.85<br>3     | 0.17<br>3      | 4.20<br>3  | 0.846         | 1.96<br>6      | 0.46<br>2 | 8.375      | 0.354 |
| <b>H-LDL</b>           | 1.33<br>7    | 0.17<br>1     | 10.46<br>8     | 0.782     | 2.05<br>5     | 0.24<br>2      | 17.4<br>5  | 0.502         | 0.96<br>7      | 0.94<br>7 | 0.987      | 0.603 |
| <b>rs59634436</b>      |              |               |                |           |               |                |            |               |                |           |            |       |
|                        | <b>Total</b> |               |                |           | <b>Men</b>    |                |            |               | <b>Women</b>   |           |            |       |
| <b>Clinical marker</b> | <b>OR</b>    | <b>95% CI</b> | <b>p-value</b> | <b>OR</b> | <b>95% CI</b> | <b>p-value</b> | <b>OR</b>  | <b>95% CI</b> | <b>p-value</b> |           |            |       |
| <b>H-BMI</b>           | 2.12<br>9    | 1.25<br>6     | 3.608          | 0.004     | 1.62<br>7     | 0.76<br>5      | 3.46<br>1  | 0.204         | 2.76<br>1      | 1.31<br>4 | 5.802      | 0.006 |
| <b>H- Waist</b>        | 1.68<br>5    | 0.99<br>4     | 2.856          | 0.051     | 1.81<br>8     | 0.82<br>4      | 4.01       | 0.135         | 1.60<br>4      | 0.78<br>2 | 3.287      | 0.195 |
| <b>H-WHI</b>           | 1.27<br>8    | 0.76<br>2     | 2.143          | 0.352     | 1.38<br>9     | 0.63<br>9      | 3.01<br>9  | 0.407         | 1.25<br>6      | 0.58<br>4 | 2.703      | 0.56  |
| <b>H-WHR</b>           | 1.52<br>9    | 0.91<br>2     | 2.565          | 0.106     | 1.27<br>9     | 0.60<br>6      | 2.70<br>1  | 0.519         | 1.80<br>3      | 0.87<br>8 | 3.701      | 0.105 |

|                        |              |               |            |                |            |               |            |                |              |               |            |                |
|------------------------|--------------|---------------|------------|----------------|------------|---------------|------------|----------------|--------------|---------------|------------|----------------|
| <b>H-%BF</b>           | 1.87<br>9    | 1.09<br>1     | 3.238      | 0.021          | 2.33<br>3  | 1.02<br>7     | 5.29<br>9  | 0.039          | 1.56<br>9    | 0.74<br>9     | 3.287      | 0.231          |
| <b>H-Insulin</b>       | 2.23<br>7    | 1.16<br>8     | 4.284      | 0.013          | 2.87       | 1.21<br>2     | 6.79<br>7  | 0.013          | 1.55<br>7    | 0.54          | 4.489      | 0.412          |
| <b>H-Glucose</b>       | 3.59<br>7    | 1.22<br>5     | 10.56<br>1 | 0.013          | 7.40<br>7  | 1.87<br>6     | 29.2<br>51 | 0.001          | 1.16         | 0.13<br>8     | 9.726      | 0.891          |
| <b>H-HOMA</b>          | 2.02<br>3    | 1.05<br>2     | 3.888      | 0.032          | 3.63<br>5  | 1.56<br>7     | 8.43<br>3  | 0.002          | 0.82<br>1    | 0.23<br>5     | 2.867      | 0.758          |
| <b>H-Cholesterol</b>   | 1.51<br>9    | 0.65          | 3.553      | 0.332          | 1.42<br>6  | 0.46          | 4.41<br>9  | 0.538          | 1.67<br>7    | 0.46          | 6.12       | 0.43           |
| <b>H-Triglycerides</b> | 1.46<br>8    | 0.81<br>1     | 2.658      | 0.2            | 1.27<br>3  | 0.55<br>7     | 2.91<br>1  | 0.567          | 1.75<br>6    | 0.74<br>4     | 4.146      | 0.195          |
| <b>L-HDL</b>           | 1.21<br>3    | 0.71<br>6     | 2.055      | 0.474          | 1.24<br>7  | 0.54<br>6     | 2.84<br>8  | 0.602          | 1.2          | 0.58<br>8     | 2.448      | 0.617          |
| <b>H-LDL</b>           | 1.51<br>4    | 0.50<br>5     | 4.54       | 0.457          | 1.10<br>3  | 0.24          | 5.07       | 0.9            | 2.39<br>3    | 0.47<br>7     | 12.01<br>5 | 0.277          |
| <b>rs78160528</b>      |              |               |            |                |            |               |            |                |              |               |            |                |
|                        | <b>Total</b> |               |            |                | <b>Men</b> |               |            |                | <b>Women</b> |               |            |                |
| <b>Clinical marker</b> | <b>OR</b>    | <b>95% CI</b> |            | <b>p-value</b> | <b>OR</b>  | <b>95% CI</b> |            | <b>p-value</b> | <b>OR</b>    | <b>95% CI</b> |            | <b>p-value</b> |
| <b>H-BMI</b>           | 1.00<br>8    | 0.37<br>3     | 2.728      | 0.988          | 1.11<br>9  | 0.26<br>2     | 4.78<br>2  | 0.88           | 0.93<br>2    | 0.23<br>6     | 3.684      | 0.92           |
| <b>H- Waist</b>        | 1.43<br>8    | 0.54<br>8     | 3.771      | 0.459          | 1.01<br>4  | 0.2           | 5.14<br>3  | 0.986          | 1.75<br>9    | 0.49<br>8     | 6.214      | 0.376          |
| <b>H-WHI</b>           | 1.09<br>2    | 0.42<br>5     | 2.807      | 0.856          | 0.72<br>2  | 0.17<br>7     | 2.94<br>7  | 0.65           | 1.75<br>6    | 0.48<br>3     | 6.382      | 0.388          |
| <b>H-WHR</b>           | 1.33<br>9    | 0.52<br>4     | 3.423      | 0.542          | 1.33<br>6  | 0.32<br>7     | 5.45<br>2  | 0.687          | 1.34<br>1    | 0.38          | 4.733      | 0.648          |
| <b>H-%BF</b>           | 1.17<br>5    | 0.44<br>7     | 3.089      | 0.744          | 1.22<br>9  | 0.27          | 5.59<br>5  | 0.791          | 1.17<br>6    | 0.33<br>3     | 4.15       | 0.802          |
| <b>H-Insulin</b>       | 1.36<br>2    | 0.36<br>6     | 5.071      | 0.645          | 2.27<br>3  | 0.36<br>8     | 14.0<br>34 | 0.367          | 0.88<br>6    | 0.10<br>5     | 7.457      | 0.912          |
| <b>H-Glucose</b>       | 0.97<br>1    | 0.95<br>7     | 0.985      | 0.462          | 0.96<br>8  | 0.94<br>7     | 0.98<br>9  | 0.608          | 0.97<br>3    | 0.95<br>5     | 0.992      | 0.603          |
| <b>H-HOMA</b>          | 0.77         | 0.17<br>4     | 3.419      | 0.731          | 0.65<br>9  | 0.07<br>9     | 5.49<br>4  | 0.699          | 0.93<br>7    | 0.11<br>5     | 7.655      | 0.952          |
| <b>H-Cholesterol</b>   | 1.48<br>9    | 0.33<br>2     | 6.68       | 0.602          | 3.12<br>3  | 0.60<br>1     | 16.2<br>44 | 0.156          | 0.94         | 0.91<br>4     | 0.967      | 0.427          |
| <b>H-Triglycerides</b> | 1.52<br>5    | 0.53<br>3     | 4.364      | 0.429          | 1.83<br>5  | 0.42<br>7     | 7.87<br>6  | 0.409          | 1.31<br>8    | 0.27<br>1     | 6.397      | 0.732          |
| <b>L-HDL</b>           | 2.27<br>5    | 0.88<br>4     | 5.855      | 0.081          | 5.29<br>9  | 1.23<br>4     | 22.7<br>57 | 0.013          | 1.16<br>5    | 0.33<br>1     | 4.109      | 0.812          |
| <b>H-LDL</b>           | 4.64<br>2    | 1.25<br>8     | 17.12      | 0.012          | 5.88<br>9  | 1.09<br>5     | 31.6<br>83 | 0.02           | 3.60<br>5    | 0.41<br>2     | 31.56<br>9 | 0.218          |
| <b>rs16997129</b>      |              |               |            |                |            |               |            |                |              |               |            |                |
|                        | <b>Total</b> |               |            |                | <b>Men</b> |               |            |                | <b>Women</b> |               |            |                |
| <b>Clinical marker</b> | <b>OR</b>    | <b>95% CI</b> |            | <b>p-value</b> | <b>OR</b>  | <b>95% CI</b> |            | <b>p-value</b> | <b>OR</b>    | <b>95% CI</b> |            | <b>p-value</b> |
| <b>H-BMI</b>           | 0.89<br>4    | 0.61<br>6     | 1.296      | 0.554          | 0.88<br>2  | 0.52<br>3     | 1.48<br>8  | 0.639          | 0.91<br>3    | 0.53<br>7     | 1.553      | 0.739          |
| <b>H- Waist</b>        | 0.90<br>1    | 0.61<br>9     | 1.311      | 0.585          | 1.05<br>3  | 0.59          | 1.87<br>8  | 0.863          | 0.77<br>2    | 0.46<br>6     | 1.278      | 0.316          |
| <b>H-WHI</b>           | 0.89<br>6    | 0.63          | 1.275      | 0.542          | 1.25<br>9  | 0.76<br>2     | 2.07<br>8  | 0.37           | 0.64<br>6    | 0.38          | 1.1        | 0.107          |



|                        |              |               |            |                |            |               |           |                |           |               |            |                |
|------------------------|--------------|---------------|------------|----------------|------------|---------------|-----------|----------------|-----------|---------------|------------|----------------|
| H-WHR                  | 0.84         | 0.59          | 1.195      | 0.332          | 0.95<br>3  | 0.57<br>7     | 1.57<br>5 | 0.853          | 0.74<br>1 | 0.45<br>1     | 1.218      | 0.238          |
| H-%BF                  | 1.02<br>2    | 0.71<br>4     | 1.461      | 0.907          | 0.69<br>1  | 0.41<br>3     | 1.15<br>5 | 0.159          | 1.53<br>1 | 0.91<br>6     | 2.559      | 0.104          |
| H-Insulin              | 1.06<br>4    | 0.61<br>7     | 1.836      | 0.824          | 0.90<br>2  | 0.43<br>9     | 1.85<br>3 | 0.78           | 1.29<br>7 | 0.54<br>9     | 3.066      | 0.555          |
| H-Glucose              | 1.43<br>9    | 0.46<br>3     | 4.475      | 0.528          | 1.67<br>6  | 0.34<br>1     | 8.22<br>8 | 0.522          | 1.23<br>4 | 0.24<br>4     | 6.23       | 0.8            |
| H-HOMA                 | 0.92<br>9    | 0.55<br>1     | 1.566      | 0.781          | 0.88<br>3  | 0.44<br>5     | 1.75<br>3 | 0.723          | 1.02<br>3 | 0.45<br>1     | 2.322      | 0.957          |
| H-Cholesterol          | 0.93         | 0.49<br>1     | 1.764      | 0.825          | 1.91<br>7  | 0.75<br>2     | 4.88<br>2 | 0.168          | 0.38<br>4 | 0.14<br>7     | 1.001      | 0.044          |
| H-Triglycerides        | 0.76         | 0.49<br>9     | 1.158      | 0.201          | 0.85<br>1  | 0.48<br>4     | 1.49<br>7 | 0.577          | 0.68<br>1 | 0.36          | 1.289      | 0.237          |
| L-HDL                  | 1.05<br>5    | 0.73<br>3     | 1.518      | 0.775          | 1.00<br>7  | 0.56<br>8     | 1.78<br>4 | 0.981          | 1.03<br>3 | 0.63<br>1     | 1.69       | 0.897          |
| H-LDL                  | 1.88<br>7    | 0.7           | 5.084      | 0.203          | 2.29<br>5  | 0.64<br>3     | 8.19<br>1 | 0.191          | 1.44<br>6 | 0.29<br>5     | 7.098      | 0.649          |
| <b>rs3813827</b>       |              |               |            |                |            |               |           |                |           |               |            |                |
|                        | <b>Total</b> |               |            |                | <b>Men</b> |               |           | <b>Women</b>   |           |               |            |                |
| <b>Clinical marker</b> | <b>OR</b>    | <b>95% CI</b> |            | <b>p-value</b> | <b>OR</b>  | <b>95% CI</b> |           | <b>p-value</b> | <b>OR</b> | <b>95% CI</b> |            | <b>p-value</b> |
| H-BMI                  | 2.66<br>9    | 0.97<br>9     | 7.277      | 0.047          | 2.39<br>4  | 0.62<br>8     | 9.12<br>5 | 0.19           | 2.98<br>9 | 0.65<br>6     | 13.62<br>8 | 0.14           |
| H- Waist               | 0.73<br>9    | 0.23<br>5     | 2.322      | 0.604          | 0.37<br>1  | 0.04<br>6     | 3.02<br>2 | 0.337          | 1.30<br>2 | 0.28<br>6     | 5.926      | 0.733          |
| H-WHI                  | 1.37<br>3    | 0.50<br>8     | 3.709      | 0.531          | 0.90<br>8  | 0.23<br>9     | 3.45<br>6 | 0.888          | 1.97      | 0.43<br>2     | 8.99       | 0.375          |
| H-WHR                  | 0.79<br>1    | 0.28<br>4     | 2.206      | 0.654          | 0.65<br>4  | 0.16          | 2.66<br>9 | 0.553          | 0.99<br>6 | 0.21<br>9     | 4.529      | 0.996          |
| H-%BF                  | 1.57<br>7    | 0.55<br>4     | 4.491      | 0.39           | 1.15<br>1  | 0.30<br>2     | 4.38<br>1 | 0.837          | 2.37<br>9 | 0.42<br>9     | 13.19<br>3 | 0.309          |
| H-Insulin              | 0.81<br>2    | 0.17<br>6     | 3.74       | 0.79           | 0.46<br>3  | 0.05<br>6     | 3.86<br>8 | 0.47           | 1.57<br>5 | 0.17          | 14.57<br>3 | 0.688          |
| H-Glucose              | 0.97<br>1    | 0.95<br>7     | 0.985      | 0.489          | 0.96<br>8  | 0.94<br>7     | 0.98<br>9 | 0.586          | 0.97<br>4 | 0.95<br>6     | 0.992      | 0.665          |
| H-HOMA                 | 0.95<br>4    | 0.21<br>1     | 4.315      | 0.952          | 0.57<br>4  | 0.07          | 4.70<br>6 | 0.602          | 1.71<br>3 | 0.19<br>4     | 15.15<br>8 | 0.626          |
| H-Cholesterol          | 0.77<br>8    | 0.10<br>1     | 6.024      | 0.81           | 0.89<br>6  | 0.86<br>1     | 0.93<br>3 | 0.309          | 2.81<br>4 | 0.32          | 24.71<br>2 | 0.332          |
| H-Triglycerides        | 0.9          | 0.25<br>2     | 3.209      | 0.871          | 0.85<br>3  | 0.17<br>3     | 4.20<br>3 | 0.846          | 0.86<br>7 | 0.10<br>2     | 7.364      | 0.897          |
| L-HDL                  | 0.80<br>1    | 0.27<br>5     | 2.338      | 0.685          | 1.52<br>2  | 0.37<br>1     | 6.24<br>8 | 0.559          | 0.45<br>6 | 0.08<br>7     | 2.389      | 0.343          |
| H-LDL                  | 1.42<br>8    | 0.18<br>2     | 11.22<br>9 | 0.734          | 0.93<br>9  | 0.91<br>1     | 0.96<br>8 | 0.447          | 5.46<br>3 | 0.59<br>4     | 50.22<br>2 | 0.094          |
| <b>rs11737840</b>      |              |               |            |                |            |               |           |                |           |               |            |                |
|                        | <b>Total</b> |               |            |                | <b>Men</b> |               |           | <b>Women</b>   |           |               |            |                |
| <b>Clinical marker</b> | <b>OR</b>    | <b>95% CI</b> |            | <b>p-value</b> | <b>OR</b>  | <b>95% CI</b> |           | <b>p-value</b> | <b>OR</b> | <b>95% CI</b> |            | <b>p-value</b> |
| H-BMI                  | 1.21<br>2    | 0.80<br>7     | 1.82       | 0.354          | 1.32<br>4  | 0.75<br>9     | 2.31      | 0.324          | 1.07<br>3 | 0.58<br>9     | 1.956      | 0.816          |
| H- Waist               | 1.30<br>8    | 0.86<br>9     | 1.967      | 0.198          | 1.17<br>5  | 0.63<br>7     | 2.16<br>7 | 0.607          | 1.55      | 0.88<br>1     | 2.728      | 0.128          |

|                        |              |               |            |                |            |               |            |                |           |               |            |                |
|------------------------|--------------|---------------|------------|----------------|------------|---------------|------------|----------------|-----------|---------------|------------|----------------|
| H-WHI                  | 1.37<br>9    | 0.93<br>5     | 2.034      | 0.105          | 1.32<br>9  | 0.76<br>3     | 2.31<br>3  | 0.316          | 1.29<br>1 | 0.70<br>7     | 2.36       | 0.406          |
| H-WHR                  | 1.04<br>4    | 0.70<br>6     | 1.542      | 0.83           | 1.06<br>3  | 0.61<br>7     | 1.83       | 0.827          | 1.02<br>4 | 0.58<br>3     | 1.797      | 0.935          |
| H-%BF                  | 1.13<br>9    | 0.76<br>9     | 1.689      | 0.516          | 1.00<br>9  | 0.58<br>5     | 1.74<br>2  | 0.973          | 1.25<br>9 | 0.71<br>1     | 2.229      | 0.431          |
| H-Insulin              | 1.08<br>5    | 0.61          | 1.929      | 0.781          | 1.63<br>1  | 0.79<br>2     | 3.36<br>1  | 0.184          | 0.48<br>4 | 0.16<br>1     | 1.457      | 0.19           |
| H-Glucose              | 1.47<br>1    | 0.50<br>9     | 4.254      | 0.474          | 1.57<br>5  | 0.38<br>3     | 6.46<br>8  | 0.527          | 1.31<br>7 | 0.25<br>9     | 6.686      | 0.74           |
| H-HOMA                 | 0.91<br>6    | 0.50<br>6     | 1.656      | 0.771          | 1.12<br>7  | 0.54<br>2     | 2.34<br>3  | 0.751          | 0.55<br>5 | 0.18<br>6     | 1.653      | 0.286          |
| H-Cholesterol          | 1.07<br>2    | 0.53          | 2.168      | 0.847          | 1.20<br>4  | 0.50<br>8     | 2.85<br>4  | 0.674          | 0.77<br>3 | 0.21<br>7     | 2.758      | 0.692          |
| H-Triglycerides        | 0.87<br>6    | 0.53<br>7     | 1.428      | 0.596          | 1.04<br>5  | 0.56<br>3     | 1.93<br>9  | 0.89           | 0.59<br>3 | 0.25<br>3     | 1.39       | 0.226          |
| L-HDL                  | 0.91<br>4    | 0.61          | 1.37       | 0.665          | 1.15<br>3  | 0.62<br>6     | 2.12<br>4  | 0.65           | 0.83<br>3 | 0.47<br>7     | 1.456      | 0.523          |
| H-LDL                  | 1.49<br>9    | 0.64<br>1     | 3.505      | 0.348          | 2.3        | 0.84<br>1     | 6.29<br>1  | 0.097          | 0.42<br>7 | 0.05<br>3     | 3.431      | 0.41           |
| <b>rs10033691</b>      |              |               |            |                |            |               |            |                |           |               |            |                |
|                        | <b>Total</b> |               |            |                | <b>Men</b> |               |            | <b>Women</b>   |           |               |            |                |
| <b>Clinical marker</b> | <b>OR</b>    | <b>95% CI</b> |            | <b>p-value</b> | <b>OR</b>  | <b>95% CI</b> |            | <b>p-value</b> | <b>OR</b> | <b>95% CI</b> |            | <b>p-value</b> |
| H-BMI                  | 1.84<br>4    | 1.14          | 2.983      | 0.012          | 1.60<br>9  | 0.80<br>5     | 3.21<br>6  | 0.177          | 2.10<br>2 | 1.07<br>6     | 4.106      | 0.027          |
| H- Waist               | 1.46<br>3    | 0.9           | 2.379      | 0.124          | 1.96<br>5  | 0.95<br>4     | 4.04<br>6  | 0.064          | 1.15<br>1 | 0.59<br>5     | 2.228      | 0.677          |
| H-WHI                  | 1.31<br>2    | 0.82          | 2.099      | 0.257          | 1.47<br>3  | 0.72          | 3.01<br>3  | 0.288          | 1.29<br>4 | 0.64<br>7     | 2.587      | 0.467          |
| H-WHR                  | 1.34<br>9    | 0.84<br>4     | 2.159      | 0.211          | 1.38<br>5  | 0.69<br>9     | 2.74<br>4  | 0.352          | 1.31<br>9 | 0.69<br>1     | 2.517      | 0.402          |
| H-%BF                  | 2.27         | 1.37<br>1     | 3.759      | 0.001          | 3.29<br>9  | 1.49<br>3     | 7.28<br>8  | 0.002          | 1.7       | 0.86<br>7     | 3.335      | 0.121          |
| H-Insulin              | 2.09<br>4    | 1.13<br>2     | 3.874      | 0.017          | 2.82<br>4  | 1.23<br>2     | 6.46<br>9  | 0.011          | 1.47<br>6 | 0.55<br>4     | 3.929      | 0.436          |
| H-Glucose              | 3.68<br>7    | 1.32<br>5     | 10.26<br>5 | 0.008          | 5.76<br>5  | 1.47<br>5     | 22.5<br>24 | 0.005          | 2.13      | 0.41<br>6     | 10.91<br>3 | 0.355          |
| H-HOMA                 | 1.83<br>1    | 0.99<br>1     | 3.385      | 0.051          | 2.95<br>7  | 1.34<br>2     | 6.51<br>4  | 0.005          | 0.90<br>1 | 0.29<br>8     | 2.723      | 0.854          |
| H-Cholesterol          | 1.13         | 0.48<br>8     | 2.617      | 0.775          | 0.73<br>8  | 0.21<br>2     | 2.57       | 0.634          | 1.86<br>1 | 0.58<br>3     | 5.943      | 0.289          |
| H-Triglycerides        | 1.33<br>7    | 0.77<br>2     | 2.317      | 0.3            | 1.08<br>3  | 0.49<br>8     | 2.35<br>5  | 0.841          | 1.72<br>7 | 0.78<br>9     | 3.78       | 0.168          |
| L-HDL                  | 1.11<br>6    | 0.68<br>9     | 1.809      | 0.656          | 0.92<br>1  | 0.41<br>4     | 2.05<br>1  | 0.841          | 1.25<br>4 | 0.65<br>8     | 2.388      | 0.493          |
| H-LDL                  | 1.48<br>3    | 0.54<br>5     | 4.034      | 0.438          | 0.39<br>5  | 0.05<br>1     | 3.07       | 0.36           | 4.47<br>9 | 1.21          | 16.58<br>4 | 0.015          |
| <b>rs2005701</b>       |              |               |            |                |            |               |            |                |           |               |            |                |
|                        | <b>Total</b> |               |            |                | <b>Men</b> |               |            | <b>Women</b>   |           |               |            |                |
| <b>Clinical marker</b> | <b>OR</b>    | <b>95% CI</b> |            | <b>p-value</b> | <b>OR</b>  | <b>95% CI</b> |            | <b>p-value</b> | <b>OR</b> | <b>95% CI</b> |            | <b>p-value</b> |
| H-BMI                  | 1.28<br>5    | 0.88<br>6     | 1.863      | 0.186          | 0.95<br>9  | 0.57          | 1.61<br>5  | 0.876          | 1.71<br>7 | 1.00<br>4     | 2.937      | 0.047          |

|                        |              |               |       |                |            |               |           |                |              |               |            |                |
|------------------------|--------------|---------------|-------|----------------|------------|---------------|-----------|----------------|--------------|---------------|------------|----------------|
| <b>H- Waist</b>        | 1.39<br>6    | 0.95<br>7     | 2.037 | 0.083          | 0.82<br>4  | 0.47          | 1.44<br>4 | 0.5            | 2.16<br>3    | 1.28<br>7     | 3.634      | 0.003          |
| <b>H-WHI</b>           | 1.33<br>9    | 0.94<br>5     | 1.896 | 0.1            | 1.13<br>8  | 0.69<br>2     | 1.87<br>1 | 0.612          | 1.65<br>9    | 0.95<br>8     | 2.876      | 0.07           |
| <b>H-WHR</b>           | 1.21<br>9    | 0.86<br>1     | 1.726 | 0.265          | 0.92       | 0.55<br>9     | 1.51<br>4 | 0.744          | 1.58<br>9    | 0.97<br>5     | 2.59       | 0.063          |
| <b>H-%BF</b>           | 1.15<br>2    | 0.81<br>3     | 1.631 | 0.428          | 1.20<br>2  | 0.72<br>2     | 2         | 0.481          | 1.08<br>6    | 0.67<br>2     | 1.754      | 0.737          |
| <b>H-Insulin</b>       | 1.13<br>3    | 0.66<br>2     | 1.94  | 0.649          | 1.60<br>7  | 0.76<br>9     | 3.35<br>6 | 0.207          | 0.76<br>8    | 0.34<br>6     | 1.705      | 0.518          |
| <b>H-Glucose</b>       | 1.58<br>3    | 0.50<br>4     | 4.972 | 0.428          | 1.01<br>1  | 0.24<br>7     | 4.13<br>3 | 0.988          | 3.29<br>2    | 0.39<br>1     | 27.70<br>7 | 0.247          |
| <b>H-HOMA</b>          | 1.07         | 0.63<br>9     | 1.791 | 0.798          | 1.45<br>6  | 0.70<br>9     | 2.99      | 0.306          | 0.72<br>1    | 0.33<br>8     | 1.538      | 0.397          |
| <b>H-Cholesterol</b>   | 0.50<br>2    | 0.23<br>1     | 1.089 | 0.214          | 0.68<br>2  | 0.37<br>3     | 1.24<br>9 | 0.077          | 1.07<br>9    | 0.39<br>3     | 2.961      | 0.883          |
| <b>H-Triglycerides</b> | 1.08<br>8    | 0.71<br>3     | 1.661 | 0.696          | 1.01<br>4  | 0.57<br>6     | 1.78<br>6 | 0.962          | 1.17<br>1    | 0.61<br>3     | 2.234      | 0.634          |
| <b>L-HDL</b>           | 0.92<br>9    | 0.65<br>4     | 1.32  | 0.682          | 0.67<br>6  | 0.38<br>9     | 1.17<br>4 | 0.164          | 1.18<br>7    | 0.74<br>1     | 1.899      | 0.477          |
| <b>H-LDL</b>           | 0.82<br>8    | 0.36<br>9     | 1.859 | 0.647          | 0.70<br>6  | 0.26          | 1.91<br>8 | 0.495          | 1.07<br>7    | 0.26<br>4     | 4.394      | 0.918          |
| <b>rs76145164</b>      |              |               |       |                |            |               |           |                |              |               |            |                |
|                        | <b>Total</b> |               |       |                | <b>Men</b> |               |           |                | <b>Women</b> |               |            |                |
| <b>Clinical marker</b> | <b>OR</b>    | <b>95% CI</b> |       | <b>p-value</b> | <b>OR</b>  | <b>95% CI</b> |           | <b>p-value</b> | <b>OR</b>    | <b>95% CI</b> |            | <b>p-value</b> |
| <b>H-BMI</b>           | 1.52<br>8    | 0.63<br>3     | 3.692 | 0.343          | 0.68<br>4  | 0.17<br>7     | 2.63<br>7 | 0.58           | 3.40<br>4    | 0.93<br>8     | 12.36<br>2 | 0.049          |
| <b>H- Waist</b>        | 0.88<br>5    | 0.33<br>8     | 2.32  | 0.805          | 0.66<br>3  | 0.14          | 3.14<br>5 | 0.604          | 1.15         | 0.31<br>7     | 4.164      | 0.832          |
| <b>H-WHI</b>           | 1.51<br>1    | 0.63<br>1     | 3.614 | 0.352          | 1.27<br>7  | 0.36<br>5     | 4.46<br>3 | 0.703          | 1.74<br>8    | 0.48<br>1     | 6.353      | 0.392          |
| <b>H-WHR</b>           | 0.65         | 0.25<br>8     | 1.634 | 0.357          | 0.48<br>1  | 0.12<br>5     | 1.85<br>3 | 0.28           | 0.87<br>7    | 0.24<br>2     | 3.172      | 0.842          |
| <b>H-%BF</b>           | 0.77<br>2    | 0.32          | 1.862 | 0.565          | 0.51<br>4  | 0.14<br>7     | 1.79<br>7 | 0.291          | 1.16<br>8    | 0.33<br>1     | 4.123      | 0.81           |
| <b>H-Insulin</b>       | 1.39<br>9    | 0.44<br>4     | 4.415 | 0.566          | 1.69<br>8  | 0.40<br>7     | 7.07<br>3 | 0.465          | 0.88<br>6    | 0.10<br>5     | 7.457      | 0.912          |
| <b>H-Glucose</b>       | 0.97         | 0.95<br>7     | 0.984 | 0.425          | 0.96<br>7  | 0.94<br>7     | 0.98<br>9 | 0.544          | 0.97<br>3    | 0.95<br>5     | 0.992      | 0.602          |
| <b>H-HOMA</b>          | 1.48         | 0.48<br>4     | 4.525 | 0.49           | 1.79<br>5  | 0.45<br>7     | 7.04<br>8 | 0.398          | 0.93<br>3    | 0.11<br>4     | 7.625      | 0.949          |
| <b>H-Cholesterol</b>   | 0.57<br>6    | 0.07<br>6     | 4.39  | 0.591          | 0.89<br>5  | 0.85<br>9     | 0.93<br>2 | 0.258          | 1.85         | 0.22<br>1     | 15.45<br>9 | 0.566          |
| <b>H-Triglycerides</b> | 3.07<br>3    | 1.26<br>4     | 7.471 | 0.009          | 1.74<br>8  | 0.49<br>6     | 6.15<br>4 | 0.381          | 5.66<br>7    | 1.57<br>6     | 20.37      | 0.003          |
| <b>L-HDL</b>           | 1.34<br>7    | 0.55<br>8     | 3.251 | 0.507          | 0.65<br>4  | 0.13<br>8     | 3.1       | 0.592          | 2.81<br>4    | 0.71<br>4     | 11.08<br>9 | 0.125          |
| <b>H-LDL</b>           | 0.95<br>3    | 0.93<br>6     | 0.971 | 0.311          | 0.93<br>8  | 0.91          | 0.96<br>7 | 0.398          | 0.96<br>7    | 0.94<br>7     | 0.987      | 0.559          |
| <b>rs76338299</b>      |              |               |       |                |            |               |           |                |              |               |            |                |
|                        | <b>Total</b> |               |       |                | <b>Men</b> |               |           |                | <b>Women</b> |               |            |                |
| <b>Clinical marker</b> | <b>OR</b>    | <b>95% CI</b> |       | <b>p-value</b> | <b>OR</b>  | <b>95% CI</b> |           | <b>p-value</b> | <b>OR</b>    | <b>95% CI</b> |            | <b>p-value</b> |

|                        |              |               |                |           |               |                |           |               |                |           |               |                |
|------------------------|--------------|---------------|----------------|-----------|---------------|----------------|-----------|---------------|----------------|-----------|---------------|----------------|
| <b>H-BMI</b>           | 0.91<br>6    | 0.50<br>2     | 1.673          | 0.776     | 1.09<br>7     | 0.48<br>2      | 2.49<br>7 | 0.826         | 0.74<br>4      | 0.30<br>3 | 1.824         | 0.518          |
| <b>H- Waist</b>        | 1.23<br>4    | 0.68<br>5     | 2.221          | 0.484     | 0.85<br>3     | 0.33           | 2.20<br>4 | 0.743         | 1.68<br>1      | 0.76      | 3.716         | 0.197          |
| <b>H-WHI</b>           | 1.09<br>5    | 0.62<br>3     | 1.923          | 0.753     | 0.75<br>8     | 0.34<br>3      | 1.67<br>8 | 0.495         | 1.58<br>7      | 0.69<br>6 | 3.618         | 0.271          |
| <b>H-WHR</b>           | 1.06<br>4    | 0.60<br>6     | 1.87           | 0.829     | 0.75<br>5     | 0.33<br>3      | 1.71<br>2 | 0.501         | 1.48<br>2      | 0.67<br>2 | 3.27          | 0.329          |
| <b>H-%BF</b>           | 1.18<br>7    | 0.67<br>4     | 2.091          | 0.553     | 1.17<br>2     | 0.52<br>7      | 2.60<br>5 | 0.698         | 1.18<br>7      | 0.53<br>1 | 2.656         | 0.677          |
| <b>H-Insulin</b>       | 0.80<br>2    | 0.32<br>4     | 1.986          | 0.633     | 0.76<br>2     | 0.24<br>3      | 2.38<br>9 | 0.642         | 0.76<br>3      | 0.16<br>7 | 3.494         | 0.728          |
| <b>H-Glucose</b>       | 0.96<br>9    | 0.95<br>4     | 0.983          | 0.184     | 0.96<br>5     | 0.94<br>3      | 0.98<br>8 | 0.328         | 0.97<br>2      | 0.95<br>3 | 0.991         | 0.369          |
| <b>H-HOMA</b>          | 0.75<br>7    | 0.31<br>2     | 1.836          | 0.538     | 0.79<br>3     | 0.26           | 2.41<br>7 | 0.685         | 0.65<br>4      | 0.14<br>7 | 2.904         | 0.575          |
| <b>H-Cholesterol</b>   | 0.65<br>4    | 0.19<br>6     | 2.181          | 0.488     | 0.31<br>9     | 0.04<br>2      | 2.44      | 0.248         | 1.28<br>4      | 0.28      | 5.893         | 0.748          |
| <b>H-Triglycerides</b> | 0.54<br>3    | 0.23<br>9     | 1.231          | 0.139     | 0.65<br>5     | 0.23<br>8      | 1.79<br>8 | 0.41          | 0.37<br>7      | 0.08<br>6 | 1.64          | 0.178          |
| <b>L-HDL</b>           | 0.84<br>8    | 0.47          | 1.529          | 0.583     | 1.56<br>3     | 0.66<br>9      | 3.65<br>4 | 0.301         | 0.51<br>9      | 0.22<br>7 | 1.187         | 0.116          |
| <b>H-LDL</b>           | 1.77<br>3    | 0.59          | 5.327          | 0.302     | 1.30<br>7     | 0.28<br>2      | 6.04<br>5 | 0.733         | 2.64<br>4      | 0.53<br>3 | 13.10<br>8    | 0.218          |
| <b>rs6533491</b>       |              |               |                |           |               |                |           |               |                |           |               |                |
|                        | <b>Total</b> |               |                |           | <b>Men</b>    |                |           |               | <b>Women</b>   |           |               |                |
| <b>Clinical marker</b> | <b>OR</b>    | <b>95% CI</b> | <b>p-value</b> | <b>OR</b> | <b>95% CI</b> | <b>p-value</b> | <b>OR</b> | <b>95% CI</b> | <b>p-value</b> | <b>OR</b> | <b>95% CI</b> | <b>p-value</b> |
| <b>H-BMI</b>           | 0.89<br>3    | 0.63<br>3     | 1.261          | 0.521     | 0.79<br>6     | 0.48<br>8      | 1.29<br>8 | 0.361         | 1.01<br>2      | 0.62<br>1 | 1.647         | 0.963          |
| <b>H- Waist</b>        | 0.67<br>6    | 0.47<br>6     | 0.958          | 0.028     | 0.88<br>6     | 0.51<br>8      | 1.51<br>4 | 0.658         | 0.52<br>6      | 0.32<br>9 | 0.841         | 0.007          |
| <b>H-WHI</b>           | 0.70<br>4    | 0.50<br>8     | 0.977          | 0.035     | 0.87<br>7     | 0.54<br>9      | 1.40<br>2 | 0.586         | 0.55<br>9      | 0.33<br>8 | 0.925         | 0.023          |
| <b>H-WHR</b>           | 0.81<br>7    | 0.58<br>9     | 1.132          | 0.225     | 0.91<br>8     | 0.57<br>5      | 1.46<br>6 | 0.721         | 0.73<br>1      | 0.46<br>3 | 1.153         | 0.179          |
| <b>H-%BF</b>           | 0.94<br>8    | 0.68<br>2     | 1.317          | 0.751     | 0.66<br>3     | 0.41<br>2      | 1.06<br>6 | 0.09          | 1.34<br>5      | 0.84<br>8 | 2.133         | 0.209          |
| <b>H-Insulin</b>       | 1.32<br>5    | 0.80<br>6     | 2.177          | 0.268     | 1.08<br>6     | 0.56<br>1      | 2.10<br>4 | 0.807         | 1.61<br>8      | 0.75<br>1 | 3.486         | 0.218          |
| <b>H-Glucose</b>       | 1.04<br>7    | 0.39<br>8     | 2.75           | 0.927     | 0.79<br>4     | 0.20<br>9      | 3.02      | 0.736         | 1.46           | 0.34<br>3 | 6.217         | 0.608          |
| <b>H-HOMA</b>          | 0.89<br>8    | 0.55<br>3     | 1.458          | 0.663     | 0.77          | 0.40<br>3      | 1.47<br>1 | 0.43          | 1.13<br>3      | 0.53<br>6 | 2.394         | 0.744          |
| <b>H-Cholesterol</b>   | 1.06<br>1    | 0.58<br>4     | 1.926          | 0.847     | 1.26          | 0.58<br>2      | 2.72<br>4 | 0.559         | 0.86           | 0.33<br>2 | 2.228         | 0.757          |
| <b>H-Triglycerides</b> | 0.99         | 0.66<br>5     | 1.474          | 0.961     | 1             | 0.58<br>7      | 1.70<br>5 | 1             | 1.02<br>2      | 0.55<br>7 | 1.875         | 0.944          |
| <b>L-HDL</b>           | 1.28<br>3    | 0.91<br>7     | 1.795          | 0.145     | 1.34<br>6     | 0.78<br>8      | 2.30<br>1 | 0.278         | 1.19<br>6      | 0.76<br>4 | 1.873         | 0.435          |
| <b>H-LDL</b>           | 1.28         | 0.57<br>8     | 2.836          | 0.542     | 1.90<br>2     | 0.68<br>4      | 5.29      | 0.213         | 0.68<br>6      | 0.18<br>1 | 2.606         | 0.58           |
| <b>rs11937052</b>      |              |               |                |           |               |                |           |               |                |           |               |                |
|                        | <b>Total</b> |               |                |           | <b>Men</b>    |                |           |               | <b>Women</b>   |           |               |                |

| Clinical marker   | OR           | 95% CI    | <i>p</i> -value | OR    | 95% CI     | <i>p</i> -value | OR         | 95% CI | <i>p</i> -value |           |            |       |
|-------------------|--------------|-----------|-----------------|-------|------------|-----------------|------------|--------|-----------------|-----------|------------|-------|
| H-BMI             | 1.79<br>7    | 1.11<br>3 | 2.901           | 0.015 | 1.60<br>9  | 0.80<br>5       | 3.21<br>6  | 0.177  | 2               | 1.03      | 3.884      | 0.038 |
| H- Waist          | 1.77<br>6    | 1.10<br>4 | 2.858           | 0.017 | 2.44<br>1  | 1.20<br>6       | 4.94       | 0.011  | 1.37<br>4       | 0.71<br>9 | 2.626      | 0.336 |
| H-WHI             | 1.05         | 0.65<br>7 | 1.676           | 0.84  | 1.54<br>3  | 0.75<br>7       | 3.14<br>3  | 0.231  | 0.72<br>8       | 0.34<br>2 | 1.546      | 0.408 |
| H-WHR             | 1.20<br>8    | 0.75<br>8 | 1.924           | 0.427 | 1.65<br>8  | 0.84<br>1       | 3.26<br>9  | 0.142  | 0.90<br>7       | 0.47<br>4 | 1.735      | 0.768 |
| H-%BF             | 1.49<br>7    | 0.92<br>4 | 2.426           | 0.1   | 2.10<br>1  | 1.00<br>9       | 4.37<br>5  | 0.044  | 1.13<br>3       | 0.58<br>5 | 2.193      | 0.712 |
| H-Insulin         | 1.35<br>9    | 0.69<br>3 | 2.665           | 0.372 | 1.52<br>9  | 0.64<br>6       | 3.62       | 0.334  | 1.04<br>3       | 0.33<br>6 | 3.242      | 0.942 |
| H-Glucose         | 1.95<br>9    | 0.62<br>3 | 6.159           | 0.242 | 5.57<br>7  | 1.42<br>9       | 21.7<br>66 | 0.006  | 0.97            | 0.95      | 0.991      | 0.246 |
| H-HOMA            | 1.34         | 0.69<br>7 | 2.575           | 0.38  | 1.76<br>9  | 0.76<br>5       | 4.09       | 0.179  | 0.90<br>1       | 0.29<br>8 | 2.723      | 0.854 |
| H-Cholesterol     | 1.53         | 0.71<br>1 | 3.293           | 0.275 | 1.37<br>9  | 0.49<br>3       | 3.85<br>7  | 0.541  | 1.80<br>7       | 0.56<br>6 | 5.766      | 0.313 |
| H-Triglycerides   | 1.19         | 0.68<br>3 | 2.075           | 0.539 | 1.4        | 0.66<br>8       | 2.93<br>3  | 0.373  | 0.98<br>6       | 0.41<br>2 | 2.355      | 0.974 |
| L-HDL             | 1.35         | 0.84<br>2 | 2.163           | 0.212 | 2.10<br>5  | 1.03<br>5       | 4.28       | 0.037  | 0.96<br>1       | 0.50<br>7 | 1.823      | 0.904 |
| H-LDL             | 0.76<br>9    | 0.22<br>6 | 2.612           | 0.673 | 0.84<br>3  | 0.18<br>5       | 3.83<br>9  | 0.826  | 0.66<br>7       | 0.08<br>2 | 5.396      | 0.703 |
| <b>rs11098070</b> |              |           |                 |       |            |                 |            |        |                 |           |            |       |
|                   | <b>Total</b> |           |                 |       | <b>Men</b> |                 |            |        | <b>Women</b>    |           |            |       |
| Clinical marker   | OR           | 95% CI    | <i>p</i> -value | OR    | 95% CI     | <i>p</i> -value | OR         | 95% CI | <i>p</i> -value |           |            |       |
| H-BMI             | 1.20<br>9    | 0.81<br>1 | 1.803           | 0.351 | 1.15<br>1  | 0.65<br>5       | 2.02<br>4  | 0.626  | 1.26<br>9       | 0.72<br>1 | 2.236      | 0.41  |
| H- Waist          | 1.12<br>6    | 0.75<br>4 | 1.682           | 0.563 | 1.27<br>8  | 0.67<br>9       | 2.40<br>7  | 0.449  | 1.03<br>3       | 0.60<br>8 | 1.754      | 0.905 |
| H-WHI             | 0.96<br>6    | 0.66<br>6 | 1.4             | 0.855 | 1.21<br>1  | 0.71<br>1       | 2.06<br>5  | 0.482  | 0.74<br>6       | 0.42<br>9 | 1.297      | 0.3   |
| H-WHR             | 1.12<br>5    | 0.77<br>3 | 1.637           | 0.539 | 1.21<br>9  | 0.70<br>9       | 2.09<br>5  | 0.475  | 1.04<br>4       | 0.62      | 1.757      | 0.872 |
| H-%BF             | 1.10<br>4    | 0.75<br>8 | 1.606           | 0.607 | 1.41<br>3  | 0.82<br>3       | 2.42<br>5  | 0.21   | 0.87<br>7       | 0.52      | 1.479      | 0.624 |
| H-Insulin         | 1.09<br>4    | 0.61<br>8 | 1.935           | 0.759 | 1.75<br>5  | 0.75<br>6       | 4.07<br>4  | 0.189  | 0.63<br>6       | 0.28<br>5 | 1.419      | 0.268 |
| H-Glucose         | 1.66<br>1    | 0.47<br>1 | 5.86            | 0.426 | 1.04<br>4  | 1.01<br>5       | 1.07<br>4  | 0.072  | 0.58            | 0.13<br>6 | 2.485      | 0.46  |
| H-HOMA            | 1.23<br>4    | 0.69<br>3 | 2.198           | 0.476 | 2.09<br>9  | 0.88<br>7       | 4.96<br>6  | 0.087  | 0.69<br>6       | 0.31<br>2 | 1.556      | 0.377 |
| H-Cholesterol     | 2.05<br>1    | 0.89<br>8 | 4.687           | 0.083 | 1.76<br>2  | 0.64<br>7       | 4.79<br>9  | 0.264  | 2.76<br>9       | 0.61<br>9 | 12.38<br>1 | 0.167 |
| H-Triglycerides   | 0.98<br>6    | 0.62<br>7 | 1.55            | 0.95  | 0.96<br>5  | 0.52<br>6       | 1.77<br>1  | 0.909  | 1.00<br>8       | 0.50<br>6 | 2.009      | 0.982 |
| L-HDL             | 0.74<br>8    | 0.51<br>4 | 1.088           | 0.129 | 0.96<br>5  | 0.52<br>6       | 1.77<br>1  | 0.909  | 0.60<br>9       | 0.36<br>6 | 1.015      | 0.056 |
| H-LDL             | 1.57<br>5    | 0.58<br>6 | 4.234           | 0.365 | 1.14<br>3  | 0.36<br>1       | 3.62<br>2  | 0.821  | 3.27<br>3       | 0.40<br>8 | 26.24<br>3 | 0.239 |
| <b>rs80343897</b> |              |           |                 |       |            |                 |            |        |                 |           |            |       |

| Clinical marker    | Total     |           |                 |       | Men       |                 |            | Women  |                 |           |            |                 |
|--------------------|-----------|-----------|-----------------|-------|-----------|-----------------|------------|--------|-----------------|-----------|------------|-----------------|
|                    | OR        | 95% CI    | <i>p</i> -value | OR    | 95% CI    | <i>p</i> -value | OR         | 95% CI | <i>p</i> -value | OR        | 95% CI     | <i>p</i> -value |
| H-BMI              | 0.88<br>6 | 0.62<br>3 | 1.262           | 0.505 | 0.88<br>5 | 0.53<br>7       | 1.46       | 0.634  | 0.88<br>9       | 0.53<br>9 | 1.466      | 0.645           |
| H- Waist           | 0.91<br>6 | 0.64<br>1 | 1.309           | 0.63  | 0.74<br>7 | 0.42<br>8       | 1.30<br>3  | 0.304  | 1.06<br>2       | 0.66<br>1 | 1.705      | 0.806           |
| H-WHI              | 1.18<br>8 | 0.85<br>3 | 1.654           | 0.31  | 1.12<br>4 | 0.69<br>7       | 1.80       | 0.644  | 1.31<br>8       | 0.79<br>6 | 2.181      | 0.284           |
| H-WHR              | 1.08<br>2 | 0.77<br>6 | 1.508           | 0.642 | 1.00<br>7 | 0.62<br>5       | 1.62<br>1  | 0.978  | 1.15<br>9       | 0.72<br>9 | 1.841      | 0.535           |
| H-%BF              | 1.02<br>2 | 0.73<br>1 | 1.428           | 0.901 | 1.17<br>1 | 0.72<br>3       | 1.89<br>9  | 0.523  | 0.90<br>5       | 0.56<br>8 | 1.444      | 0.678           |
| H-Insulin          | 0.70<br>8 | 0.42<br>2 | 1.189           | 0.192 | 0.56<br>2 | 0.27<br>8       | 1.13<br>6  | 0.107  | 0.93<br>5       | 0.42<br>9 | 2.037      | 0.866           |
| H-Glucose          | 0.20<br>2 | 0.04<br>5 | 0.895           | 0.02  | 0.40<br>7 | 0.08<br>3       | 1.99<br>7  | 0.255  | 0.96<br>2       | 0.93<br>4 | 0.99       | 0.026           |
| H-HOMA             | 0.80<br>1 | 0.48<br>6 | 1.322           | 0.386 | 0.66<br>7 | 0.33<br>9       | 1.31<br>2  | 0.24   | 1.01<br>6       | 0.47<br>8 | 2.162      | 0.966           |
| H-Cholesterol      | 1.57<br>7 | 0.86<br>8 | 2.865           | 0.132 | 1.64<br>9 | 0.76<br>4       | 3.56<br>1  | 0.201  | 1.48<br>7       | 0.57<br>3 | 3.858      | 0.414           |
| H-Triglycerides    | 0.93<br>1 | 0.62      | 1.399           | 0.732 | 0.98<br>1 | 0.57            | 1.68<br>9  | 0.945  | 0.87<br>1       | 0.46<br>7 | 1.622      | 0.664           |
| L-HDL              | 0.65<br>4 | 0.46<br>2 | 0.924           | 0.016 | 0.60<br>9 | 0.34<br>7       | 1.07       | 0.084  | 0.65<br>8       | 0.41<br>6 | 1.041      | 0.074           |
| H-LDL              | 1.37<br>3 | 0.63<br>4 | 2.974           | 0.421 | 1.32<br>1 | 0.49<br>4       | 3.53       | 0.579  | 1.47<br>1       | 0.41<br>7 | 5.191      | 0.548           |
| <b>rs114422025</b> |           |           |                 |       |           |                 |            |        |                 |           |            |                 |
| Clinical marker    | Total     |           |                 |       | Men       |                 |            | Women  |                 |           |            |                 |
|                    | OR        | 95% CI    | <i>p</i> -value | OR    | 95% CI    | <i>p</i> -value | OR         | 95% CI | <i>p</i> -value | OR        | 95% CI     | <i>p</i> -value |
| H-BMI              | 1.26<br>7 | 0.40<br>9 | 3.924           | 0.682 | 0.92<br>8 | 0.16<br>7       | 5.15<br>7  | 0.932  | 1.65<br>5       | 0.36<br>3 | 7.544      | 0.513           |
| H- Waist           | 1.40<br>7 | 0.45<br>4 | 4.361           | 0.553 | 1.53<br>6 | 0.27<br>5       | 8.57       | 0.623  | 1.30<br>2       | 0.28<br>6 | 5.926      | 0.733           |
| H-WHI              | 0.84<br>8 | 0.27<br>4 | 2.622           | 0.774 | 1.46<br>9 | 0.26<br>5       | 8.15<br>4  | 0.659  | 0.42<br>4       | 0.05      | 3.57       | 0.418           |
| H-WHR              | 0.82<br>6 | 0.26<br>7 | 2.555           | 0.74  | 1.33<br>3 | 0.26<br>4       | 6.72<br>2  | 0.728  | 0.52<br>4       | 0.1       | 2.744      | 0.439           |
| H-%BF              | 1.04      | 0.33<br>1 | 3.264           | 0.946 | 1.38<br>3 | 0.22<br>7       | 8.40<br>8  | 0.725  | 0.87<br>4       | 0.19<br>2 | 3.976      | 0.862           |
| H-Insulin          | 3.10<br>5 | 0.85<br>5 | 11.28<br>2      | 0.071 | 1.69<br>3 | 0.3             | 9.55<br>4  | 0.549  | 6.58<br>6       | 0.89<br>3 | 48.59<br>3 | 0.035           |
| H-Glucose          | 0.97<br>1 | 0.95<br>7 | 0.985           | 0.534 | 0.96<br>8 | 0.94<br>8       | 0.98<br>9  | 0.658  | 0.97<br>4       | 0.95<br>6 | 0.992      | 0.665           |
| H-HOMA             | 4.67<br>8 | 1.44<br>5 | 15.14<br>1      | 0.005 | 4.92<br>9 | 0.96<br>1       | 25.2<br>64 | 0.036  | 4.44<br>8       | 0.78<br>1 | 25.35      | 0.068           |
| H-Cholesterol      | 0.97<br>8 | 0.12<br>4 | 7.691           | 0.983 | 1.81<br>4 | 0.20<br>5       | 16.0<br>85 | 0.589  | 0.94<br>1       | 0.91<br>5 | 0.968      | 0.509           |
| H-Triglycerides    | 2.50<br>5 | 0.80<br>5 | 7.799           | 0.102 | 3.08<br>7 | 0.60<br>9       | 15.6<br>48 | 0.154  | 2.13<br>3       | 0.40<br>2 | 11.31<br>6 | 0.364           |
| L-HDL              | 2.10<br>4 | 0.69<br>8 | 6.344           | 0.178 | 1.51<br>4 | 0.27<br>1       | 8.44<br>6  | 0.635  | 2.96<br>8       | 0.56<br>7 | 15.53<br>4 | 0.179           |
| H-LDL              | 1.79<br>5 | 0.22<br>5 | 14.33<br>2      | 0.577 | 3.32<br>5 | 0.36<br>6       | 30.1<br>74 | 0.26   | 0.96<br>7       | 0.94<br>7 | 0.987      | 0.627           |

| rs6533495       |           |           |       |                 |           |           |           |                 |           |           |            |                 |
|-----------------|-----------|-----------|-------|-----------------|-----------|-----------|-----------|-----------------|-----------|-----------|------------|-----------------|
| Clinical marker | Total     |           |       |                 | Men       |           |           | Women           |           |           |            |                 |
|                 | OR        | 95% CI    |       | <i>p</i> -value | OR        | 95% CI    |           | <i>p</i> -value | OR        | 95% CI    |            | <i>p</i> -value |
| H-BMI           | 0.92<br>6 | 0.63<br>7 | 1.347 | 0.687           | 0.88<br>7 | 0.52<br>2 | 1.51      | 0.661           | 0.96<br>4 | 0.56<br>8 | 1.637      | 0.893           |
| H- Waist        | 0.88<br>1 | 0.60<br>4 | 1.285 | 0.512           | 0.77<br>1 | 0.43<br>4 | 1.36<br>8 | 0.375           | 0.97<br>8 | 0.58<br>9 | 1.624      | 0.933           |
| H-WHI           | 0.76<br>7 | 0.53<br>8 | 1.093 | 0.143           | 0.71<br>4 | 0.42<br>4 | 1.20<br>4 | 0.207           | 0.77      | 0.45<br>1 | 1.315      | 0.339           |
| H-WHR           | 0.85<br>2 | 0.59<br>7 | 1.217 | 0.38            | 0.71<br>7 | 0.43      | 1.19<br>6 | 0.203           | 1.00<br>3 | 0.61      | 1.647      | 0.991           |
| H-%BF           | 1.03      | 0.71<br>9 | 1.475 | 0.874           | 0.91<br>9 | 0.54<br>8 | 1.54<br>1 | 0.749           | 1.14<br>8 | 0.69<br>3 | 1.9        | 0.594           |
| H-Insulin       | 0.81      | 0.47<br>6 | 1.379 | 0.439           | 0.89<br>4 | 0.43<br>5 | 1.83<br>6 | 0.761           | 0.70<br>6 | 0.31<br>7 | 1.572      | 0.395           |
| H-Glucose       | 0.77<br>3 | 0.28<br>1 | 2.123 | 0.617           | 0.51<br>1 | 0.13<br>4 | 1.95<br>3 | 0.32            | 1.3       | 0.25<br>8 | 6.563      | 0.751           |
| H-HOMA          | 0.98<br>9 | 0.58      | 1.688 | 0.968           | 1.17<br>9 | 0.57<br>2 | 2.43      | 0.658           | 0.80<br>4 | 0.36<br>1 | 1.791      | 0.595           |
| H-Cholesterol   | 1.81<br>9 | 0.85<br>9 | 3.853 | 0.114           | 1.35<br>4 | 0.55<br>6 | 3.30<br>1 | 0.505           | 3.39<br>6 | 0.76<br>1 | 15.15<br>8 | 0.091           |
| H-Triglycerides | 1.01<br>9 | 0.65<br>9 | 1.575 | 0.934           | 0.78<br>7 | 0.44<br>4 | 1.39<br>5 | 0.414           | 1.44<br>1 | 0.71<br>5 | 2.902      | 0.306           |
| L-HDL           | 0.79<br>8 | 0.55<br>6 | 1.145 | 0.22            | 0.66<br>5 | 0.37<br>7 | 1.17<br>1 | 0.158           | 0.90<br>3 | 0.55<br>5 | 1.469      | 0.681           |
| H-LDL           | 1.91<br>7 | 0.71<br>4 | 5.146 | 0.19            | 2.02<br>5 | 0.56<br>7 | 7.23<br>6 | 0.27            | 1.75      | 0.36<br>4 | 8.403      | 0.481           |

  

| rs28722886      |           |           |       |                 |           |           |           |                 |           |           |       |                 |
|-----------------|-----------|-----------|-------|-----------------|-----------|-----------|-----------|-----------------|-----------|-----------|-------|-----------------|
| Clinical marker | Total     |           |       |                 | Men       |           |           | Women           |           |           |       |                 |
|                 | OR        | 95% CI    |       | <i>p</i> -value | OR        | 95% CI    |           | <i>p</i> -value | OR        | 95% CI    |       | <i>p</i> -value |
| H-BMI           | 0.84<br>5 | 0.59<br>4 | 1.201 | 0.347           | 1.04<br>1 | 0.63<br>3 | 1.71<br>3 | 0.874           | 0.69      | 0.41<br>9 | 1.138 | 0.146           |
| H- Waist        | 0.85<br>6 | 0.60<br>1 | 1.22  | 0.392           | 0.86<br>6 | 0.5<br>8  | 1.49<br>8 | 0.608           | 0.82<br>1 | 0.51<br>2 | 1.314 | 0.412           |
| H-WHI           | 1.30<br>4 | 0.93<br>7 | 1.816 | 0.116           | 1.42      | 0.87<br>8 | 2.29<br>8 | 0.153           | 1.36<br>5 | 0.82<br>5 | 2.258 | 0.226           |
| H-WHR           | 1.14<br>4 | 0.82<br>1 | 1.592 | 0.428           | 1.37<br>5 | 0.85<br>3 | 2.21<br>7 | 0.192           | 0.96<br>2 | 0.60<br>8 | 1.524 | 0.871           |
| H-%BF           | 0.92<br>8 | 0.66<br>5 | 1.295 | 0.66            | 1.05<br>4 | 0.65<br>1 | 1.70<br>4 | 0.832           | 0.83<br>2 | 0.52<br>2 | 1.325 | 0.439           |
| H-Insulin       | 1.1       | 0.66<br>6 | 1.818 | 0.711           | 0.89<br>6 | 0.45<br>2 | 1.77<br>7 | 0.754           | 1.59<br>7 | 0.73<br>5 | 3.47  | 0.237           |
| H-Glucose       | 0.70<br>3 | 0.25<br>6 | 1.926 | 0.491           | 0.38<br>6 | 0.07<br>9 | 1.89<br>1 | 0.225           | 1.23<br>3 | 0.30<br>3 | 5.024 | 0.771           |
| H-HOMA          | 1.03<br>3 | 0.62<br>9 | 1.695 | 0.899           | 0.78<br>8 | 0.40<br>2 | 1.54<br>6 | 0.49            | 1.52<br>7 | 0.71<br>5 | 3.261 | 0.273           |
| H-Cholesterol   | 1.15<br>8 | 0.63<br>7 | 2.106 | 0.63            | 1.55<br>6 | 0.72      | 3.36      | 0.259           | 0.76<br>9 | 0.29      | 2.039 | 0.597           |
| H-Triglycerides | 1.17<br>7 | 0.78<br>7 | 1.76  | 0.428           | 1.10<br>1 | 0.64      | 1.89<br>4 | 0.73            | 1.33<br>9 | 0.72<br>6 | 2.47  | 0.35            |
| L-HDL           | 1.30<br>3 | 0.92<br>9 | 1.829 | 0.125           | 1.01<br>9 | 0.59<br>2 | 1.75<br>6 | 0.945           | 1.50<br>6 | 0.95<br>6 | 2.372 | 0.077           |

|                        |              |               |       |                |            |               |            |                |              |               |            |                |
|------------------------|--------------|---------------|-------|----------------|------------|---------------|------------|----------------|--------------|---------------|------------|----------------|
| <b>H-LDL</b>           | 0.67<br>7    | 0.29<br>7     | 1.545 | 0.353          | 0.74<br>3  | 0.26<br>7     | 2.07       | 0.571          | 0.60<br>4    | 0.14<br>8     | 2.463      | 0.48           |
| <b>rs6533497</b>       |              |               |       |                |            |               |            |                |              |               |            |                |
|                        | <b>Total</b> |               |       |                | <b>Men</b> |               |            |                | <b>Women</b> |               |            |                |
| <b>Clinical marker</b> | <b>OR</b>    | <b>95% CI</b> |       | <b>p-value</b> | <b>OR</b>  | <b>95% CI</b> |            | <b>p-value</b> | <b>OR</b>    | <b>95% CI</b> |            | <b>p-value</b> |
| <b>H-BMI</b>           | 1.08<br>6    | 0.69<br>5     | 1.697 | 0.719          | 0.84<br>7  | 0.44<br>8     | 1.60<br>1  | 0.609          | 0.84<br>7    | 0.44<br>8     | 1.601      | 0.31           |
| <b>H- Waist</b>        | 0.64<br>7    | 0.39<br>7     | 1.053 | 0.078          | 0.65<br>6  | 0.31<br>1     | 1.38<br>5  | 0.268          | 0.64<br>9    | 0.33<br>9     | 1.245      | 0.193          |
| <b>H-WHI</b>           | 0.84<br>1    | 0.54<br>7     | 1.294 | 0.432          | 1.02<br>3  | 0.55<br>9     | 1.87<br>3  | 0.942          | 0.56<br>1    | 0.26<br>8     | 1.175      | 0.123          |
| <b>H-WHR</b>           | 0.85<br>5    | 0.55<br>7     | 1.315 | 0.477          | 0.75<br>9  | 0.41<br>1     | 1.40<br>1  | 0.379          | 0.96<br>2    | 0.52<br>6     | 1.76       | 0.901          |
| <b>H-%BF</b>           | 0.87         | 0.56<br>4     | 1.342 | 0.53           | 0.68<br>1  | 0.37<br>1     | 1.24<br>9  | 0.214          | 1.10<br>1    | 0.59<br>2     | 2.045      | 0.762          |
| <b>H-Insulin</b>       | 1.13         | 0.61<br>2     | 2.086 | 0.697          | 1.49<br>7  | 0.69<br>1     | 3.24<br>1  | 0.306          | 0.64<br>6    | 0.21<br>3     | 1.962      | 0.44           |
| <b>H-Glucose</b>       | 1.97<br>6    | 0.68<br>1     | 5.733 | 0.203          | 1.27<br>2  | 0.25<br>7     | 6.30<br>2  | 0.769          | 3.02<br>4    | 0.7           | 13.06<br>2 | 0.121          |
| <b>H-HOMA</b>          | 1.16<br>4    | 0.63          | 2.148 | 0.629          | 1.24<br>5  | 0.56<br>9     | 2.72<br>8  | 0.585          | 0.97<br>5    | 0.35<br>5     | 2.681      | 0.961          |
| <b>H-Cholesterol</b>   | 0.79<br>7    | 0.34<br>7     | 1.832 | 0.593          | 0.91<br>1  | 0.33<br>1     | 2.51<br>1  | 0.858          | 0.59<br>1    | 0.13<br>2     | 2.649      | 0.489          |
| <b>H-Triglycerides</b> | 1.11<br>1    | 0.66<br>6     | 1.855 | 0.687          | 1.22<br>6  | 0.62<br>8     | 2.39<br>1  | 0.552          | 0.93<br>7    | 0.41<br>1     | 2.133      | 0.876          |
| <b>L-HDL</b>           | 1.14<br>9    | 0.74<br>6     | 1.771 | 0.529          | 1.71<br>4  | 0.9           | 3.26<br>6  | 0.099          | 0.87<br>5    | 0.48<br>2     | 1.588      | 0.662          |
| <b>H-LDL</b>           | 0.79<br>8    | 0.27          | 2.357 | 0.683          | 0.26<br>2  | 0.03<br>4     | 2.02<br>1  | 0.169          | 2.14<br>3    | 0.53<br>6     | 8.57       | 0.272          |
| <b>rs77504516</b>      |              |               |       |                |            |               |            |                |              |               |            |                |
|                        | <b>Total</b> |               |       |                | <b>Men</b> |               |            |                | <b>Women</b> |               |            |                |
| <b>Clinical marker</b> | <b>OR</b>    | <b>95% CI</b> |       | <b>p-value</b> | <b>OR</b>  | <b>95% CI</b> |            | <b>p-value</b> | <b>OR</b>    | <b>95% CI</b> |            | <b>p-value</b> |
| <b>H-BMI</b>           | 1.29<br>7    | 0.64<br>9     | 2.596 | 0.461          | 1.24       | 0.42<br>8     | 3.59<br>1  | 0.692          | 1.37<br>2    | 0.54<br>9     | 3.431      | 0.499          |
| <b>H- Waist</b>        | 1.11<br>9    | 0.54<br>7     | 2.29  | 0.758          | 2.10<br>3  | 0.72<br>1     | 6.13       | 0.166          | 0.67<br>3    | 0.25<br>3     | 1.787      | 0.426          |
| <b>H-WHI</b>           | 0.67         | 0.32<br>8     | 1.367 | 0.269          | 0.83<br>5  | 0.29<br>4     | 2.36<br>9  | 0.736          | 0.58<br>8    | 0.19<br>2     | 1.801      | 0.349          |
| <b>H-WHR</b>           | 0.83<br>6    | 0.41<br>9     | 1.668 | 0.612          | 1.17<br>2  | 0.41<br>3     | 3.32<br>4  | 0.767          | 0.64<br>5    | 0.25<br>3     | 1.647      | 0.358          |
| <b>H-%BF</b>           | 0.82<br>1    | 0.41<br>7     | 1.619 | 0.57           | 1.05       | 0.37          | 2.98       | 0.928          | 0.70<br>2    | 0.28<br>2     | 1.748      | 0.447          |
| <b>H-Insulin</b>       | 0.68<br>2    | 0.23<br>1     | 2.014 | 0.487          | 1.01<br>4  | 0.26<br>7     | 3.85<br>6  | 0.983          | 0.36<br>9    | 0.04<br>7     | 2.885      | 0.325          |
| <b>H-Glucose</b>       | 0.97<br>3    | 0.12<br>5     | 7.552 | 0.979          | 2.34<br>8  | 0.27<br>4     | 20.1<br>04 | 0.424          | 0.97<br>2    | 0.95<br>4     | 0.991      | 0.442          |
| <b>H-HOMA</b>          | 0.81<br>5    | 0.27<br>9     | 2.382 | 0.708          | 1.27<br>9  | 0.34<br>2     | 4.78<br>6  | 0.715          | 0.42<br>6    | 0.05<br>5     | 3.299      | 0.402          |
| <b>H-Cholesterol</b>   | 0.67<br>5    | 0.15<br>7     | 2.899 | 0.595          | 0.62       | 0.07<br>9     | 4.89<br>4  | 0.648          | 0.80<br>3    | 0.10<br>2     | 6.346      | 0.835          |
| <b>H-Triglycerides</b> | 1.55<br>9    | 0.73          | 3.328 | 0.248          | 1.55<br>3  | 0.51<br>2     | 4.70<br>7  | 0.435          | 1.70<br>1    | 0.59<br>3     | 4.878      | 0.319          |



|                         |              |               |       |                |            |               |           |                |              |               |            |                |
|-------------------------|--------------|---------------|-------|----------------|------------|---------------|-----------|----------------|--------------|---------------|------------|----------------|
| L-HDL                   | 1.14         | 0.57<br>1     | 2.277 | 0.711          | 1.55<br>3  | 0.51<br>2     | 4.70<br>7 | 0.435          | 0.86<br>1    | 0.35<br>2     | 2.106      | 0.744          |
| H-LDL                   | 0.58<br>8    | 0.07<br>7     | 4.46  | 0.604          | 1.13<br>8  | 0.14<br>1     | 9.21      | 0.904          | 0.96<br>6    | 0.94<br>5     | 0.987      | 0.389          |
| <b>rs6815102</b>        |              |               |       |                |            |               |           |                |              |               |            |                |
|                         | <b>Total</b> |               |       |                | <b>Men</b> |               |           |                | <b>Women</b> |               |            |                |
| <b>Clinical marker</b>  | <b>OR</b>    | <b>95% CI</b> |       | <b>p-value</b> | <b>OR</b>  | <b>95% CI</b> |           | <b>p-value</b> | <b>OR</b>    | <b>95% CI</b> |            | <b>p-value</b> |
| H-BMI                   | 1.09<br>5    | 0.77<br>1     | 1.555 | 0.615          | 0.91<br>8  | 0.55<br>8     | 1.51      | 0.736          | 1.28<br>4    | 0.78<br>1     | 2.111      | 0.326          |
| H- Waist                | 0.79<br>7    | 0.56<br>1     | 1.133 | 0.206          | 0.71       | 0.41<br>3     | 1.22      | 0.215          | 0.89<br>4    | 0.56          | 1.428      | 0.641          |
| H-WHI                   | 1.04<br>6    | 0.75<br>1     | 1.455 | 0.791          | 1.08<br>3  | 0.67<br>2     | 1.74<br>7 | 0.744          | 0.91<br>6    | 0.55<br>5     | 1.512      | 0.732          |
| H-WHR                   | 1.08<br>5    | 0.77<br>9     | 1.511 | 0.63           | 1.11<br>4  | 0.68<br>9     | 1.8       | 0.661          | 1.06         | 0.67          | 1.677      | 0.804          |
| H-%BF                   | 1.14<br>1    | 0.81<br>7     | 1.593 | 0.44           | 1.07<br>6  | 0.66<br>4     | 1.74<br>3 | 0.769          | 1.18<br>2    | 0.74<br>4     | 1.88       | 0.481          |
| H-Insulin               | 0.57<br>5    | 0.34<br>9     | 0.949 | 0.029          | 0.47<br>8  | 0.24<br>4     | 0.93<br>9 | 0.03           | 0.68<br>4    | 0.31<br>9     | 1.465      | 0.328          |
| H-Glucose               | 0.71<br>6    | 0.26<br>5     | 1.934 | 0.509          | 0.52<br>4  | 0.13<br>8     | 1.99<br>4 | 0.337          | 1.03<br>5    | 0.22<br>8     | 4.706      | 0.964          |
| H-HOMA                  | 0.83<br>4    | 0.51<br>2     | 1.359 | 0.466          | 0.65<br>3  | 0.34<br>1     | 1.25<br>1 | 0.198          | 1.06<br>4    | 0.50<br>1     | 2.263      | 0.872          |
| H-<br>Cholesterol       | 1.17<br>9    | 0.63<br>9     | 2.174 | 0.598          | 1.10<br>5  | 0.50<br>1     | 2.43<br>6 | 0.805          | 1.23<br>4    | 0.46<br>5     | 3.273      | 0.673          |
| H-<br>Triglyceride<br>s | 0.93<br>1    | 0.62<br>2     | 1.396 | 0.731          | 0.88<br>7  | 0.51<br>5     | 1.52<br>8 | 0.666          | 0.94<br>3    | 0.51<br>1     | 1.743      | 0.853          |
| L-HDL                   | 0.85<br>5    | 0.61          | 1.2   | 0.366          | 0.95<br>8  | 0.55<br>5     | 1.65<br>4 | 0.878          | 0.83         | 0.52<br>9     | 1.303      | 0.419          |
| H-LDL                   | 1.47         | 0.64<br>9     | 3.327 | 0.354          | 0.95<br>2  | 0.35<br>2     | 2.57<br>9 | 0.924          | 3.20<br>5    | 0.66<br>9     | 15.34<br>6 | 0.126          |
| <b>rs4326075</b>        |              |               |       |                |            |               |           |                |              |               |            |                |
|                         | <b>Total</b> |               |       |                | <b>Men</b> |               |           |                | <b>Women</b> |               |            |                |
| <b>Clinical marker</b>  | <b>OR</b>    | <b>95% CI</b> |       | <b>p-value</b> | <b>OR</b>  | <b>95% CI</b> |           | <b>p-value</b> | <b>OR</b>    | <b>95% CI</b> |            | <b>p-value</b> |
| H-BMI                   | 0.96<br>2    | 0.67<br>6     | 1.368 | 0.83           | 0.86<br>7  | 0.52<br>6     | 1.42<br>7 | 0.575          | 1.05<br>5    | 0.64<br>1     | 1.738      | 0.834          |
| H- Waist                | 0.92         | 0.64<br>4     | 1.314 | 0.646          | 0.64       | 0.36<br>5     | 1.12<br>1 | 0.118          | 1.24<br>4    | 0.77<br>4     | 1.999      | 0.369          |
| H-WHI                   | 1.28<br>3    | 0.92<br>1     | 1.789 | 0.141          | 1.13<br>3  | 0.70<br>3     | 1.82<br>7 | 0.61           | 1.40<br>5    | 0.84<br>7     | 2.331      | 0.188          |
| H-WHR                   | 1.15<br>7    | 0.83          | 1.614 | 0.391          | 1.11<br>7  | 0.69<br>4     | 1.79<br>8 | 0.649          | 1.19<br>7    | 0.75<br>1     | 1.908      | 0.451          |
| H-%BF                   | 1.19<br>9    | 0.85<br>7     | 1.678 | 0.289          | 1.23<br>5  | 0.76<br>3     | 2         | 0.392          | 1.15<br>1    | 0.71<br>9     | 1.841      | 0.559          |
| H-Insulin               | 0.72<br>6    | 0.43<br>2     | 1.221 | 0.227          | 0.50<br>2  | 0.24<br>4     | 1.03<br>1 | 0.058          | 1.11<br>2    | 0.51<br>5     | 2.4        | 0.788          |
| H-Glucose               | 0.31<br>2    | 0.08<br>9     | 1.099 | 0.056          | 0.38<br>5  | 0.07<br>9     | 1.88<br>7 | 0.224          | 0.22<br>4    | 0.02<br>7     | 1.844      | 0.13           |
| H-HOMA                  | 0.92<br>8    | 0.56<br>5     | 1.523 | 0.767          | 0.66<br>9  | 0.34<br>3     | 1.30<br>6 | 0.239          | 1.33<br>4    | 0.63          | 2.824      | 0.452          |
| H-<br>Cholesterol       | 1.35         | 0.74<br>3     | 2.456 | 0.324          | 1.13<br>9  | 0.52<br>6     | 2.46<br>7 | 0.742          | 1.66<br>4    | 0.64<br>1     | 4.318      | 0.293          |

|                        |              |               |       |                |            |               |            |                |              |               |       |                |
|------------------------|--------------|---------------|-------|----------------|------------|---------------|------------|----------------|--------------|---------------|-------|----------------|
| <b>H-Triglycerides</b> | 0.68<br>7    | 0.45<br>2     | 1.046 | 0.08           | 0.63<br>3  | 0.36<br>1     | 1.10<br>9  | 0.109          | 0.72<br>2    | 0.37<br>9     | 1.374 | 0.321          |
| <b>L-HDL</b>           | 0.55<br>2    | 0.31<br>2     | 0.977 | 0.042          | 0.55<br>2  | 0.31<br>2     | 0.97<br>7  | 0.04           | 0.84<br>4    | 0.53<br>3     | 1.336 | 0.47           |
| <b>H-LDL</b>           | 1.65<br>1    | 0.76<br>2     | 3.578 | 0.2            | 1.60<br>1  | 0.59<br>9     | 4.27<br>9  | 0.346          | 1.64         | 0.46<br>5     | 5.79  | 0.439          |
| <b>rs116418972</b>     |              |               |       |                |            |               |            |                |              |               |       |                |
|                        | <b>Total</b> |               |       |                | <b>Men</b> |               |            |                | <b>Women</b> |               |       |                |
| <b>Clinical marker</b> | <b>OR</b>    | <b>95% CI</b> |       | <b>p-value</b> | <b>OR</b>  | <b>95% CI</b> |            | <b>p-value</b> | <b>OR</b>    | <b>95% CI</b> |       | <b>p-value</b> |
| <b>H-BMI</b>           | 1.15<br>5    | 0.33<br>4     | 3.994 | 0.82           | 1.86<br>7  | 0.11<br>6     | 30.1<br>79 | 0.656          | 1.09<br>2    | 0.26<br>7     | 4.464 | 0.902          |
| <b>H- Waist</b>        | 1.28<br>3    | 0.37<br>1     | 4.436 | 0.694          | 3.07<br>1  | 0.19<br>1     | 49.7<br>52 | 0.408          | 0.85<br>9    | 0.21<br>1     | 3.504 | 0.833          |
| <b>H-WHI</b>           | 0.77<br>4    | 0.22<br>4     | 2.674 | 0.686          | 0.57<br>5  | 0.52<br>1     | 0.63<br>6  | 0.227          | 0.73<br>1    | 0.14<br>9     | 3.592 | 0.7            |
| <b>H-WHR</b>           | 0.75<br>4    | 0.21<br>8     | 2.605 | 0.655          | 1.32<br>8  | 0.08<br>2     | 21.4<br>41 | 0.842          | 0.65<br>6    | 0.16<br>1     | 2.674 | 0.556          |
| <b>H-%BF</b>           | 0.86<br>4    | 0.26<br>1     | 2.863 | 0.811          | 0.51<br>8  | 0.46<br>2     | 0.58<br>1  | 0.175          | 0.57<br>5    | 0.14<br>1     | 2.345 | 0.437          |
| <b>H-Insulin</b>       | 0.81<br>5    | 0.77<br>9     | 0.853 | 0.246          |            |               |            |                | 0.85<br>8    | 0.81<br>3     | 0.905 | 0.322          |
| <b>H-Glucose</b>       | 0.97<br>1    | 0.95<br>8     | 0.985 | 0.568          | 0.96<br>9  | 0.94<br>9     | 0.98<br>9  | 0.8            | 0.97<br>4    | 0.95<br>6     | 0.992 | 0.622          |
| <b>H-HOMA</b>          | 0.85<br>9    | 0.83          | 0.889 | 0.201          | 0.82<br>2  | 0.77<br>6     | 0.87<br>1  | 0.513          | 0.89<br>1    | 0.85<br>6     | 0.928 | 0.326          |
| <b>H-Cholesterol</b>   | 0.92         | 0.89<br>8     | 0.942 | 0.329          | 0.89<br>9  | 0.86<br>4     | 0.93<br>4  | 0.636          | 0.94         | 0.91<br>4     | 0.967 | 0.452          |
| <b>H-Triglycerides</b> | 0.79<br>3    | 0.76          | 0.826 | 0.091          | 0.74<br>8  | 0.7           | 0.8        | 0.414          | 0.83<br>4    | 0.79<br>4     | 0.877 | 0.184          |
| <b>L-HDL</b>           | 2.16         | 0.65<br>1     | 7.162 | 0.198          | 3.02<br>8  | 0.18<br>7     | 49.0<br>44 | 0.414          | 1.46<br>6    | 0.38<br>6     | 5.565 | 0.574          |
| <b>H-LDL</b>           | 0.95<br>4    | 0.93<br>7     | 0.971 | 0.468          | 0.94<br>1  | 0.91<br>4     | 0.96<br>8  | 0.723          | 0.96<br>7    | 0.94<br>7     | 0.987 | 0.58           |
| <b>rs11729740</b>      |              |               |       |                |            |               |            |                |              |               |       |                |
|                        | <b>Total</b> |               |       |                | <b>Men</b> |               |            |                | <b>Women</b> |               |       |                |
| <b>Clinical marker</b> | <b>OR</b>    | <b>95% CI</b> |       | <b>p-value</b> | <b>OR</b>  | <b>95% CI</b> |            | <b>p-value</b> | <b>OR</b>    | <b>95% CI</b> |       | <b>p-value</b> |
| <b>H-BMI</b>           | 1.14<br>3    | 0.67<br>1     | 1.945 | 0.624          | 1.61<br>8  | 0.76<br>1     | 3.43<br>9  | 0.209          | 0.81<br>9    | 0.37<br>8     | 1.775 | 0.614          |
| <b>H- Waist</b>        | 1.02<br>2    | 0.59<br>1     | 1.769 | 0.937          | 1.28       | 0.56          | 2.92<br>6  | 0.559          | 0.84<br>7    | 0.40<br>6     | 1.766 | 0.658          |
| <b>H-WHI</b>           | 1.19<br>6    | 0.71<br>8     | 1.993 | 0.492          | 1.17<br>4  | 0.54<br>7     | 2.52       | 0.682          | 1.33<br>8    | 0.63<br>7     | 2.811 | 0.443          |
| <b>H-WHR</b>           | 0.82<br>3    | 0.48<br>9     | 1.386 | 0.465          | 0.95<br>2  | 0.44<br>7     | 2.02<br>6  | 0.899          | 0.72<br>3    | 0.35<br>2     | 1.488 | 0.379          |
| <b>H-%BF</b>           | 0.76<br>3    | 0.45<br>3     | 1.284 | 0.308          | 0.78<br>1  | 0.36<br>5     | 1.66<br>9  | 0.524          | 0.75<br>4    | 0.36<br>8     | 1.547 | 0.442          |
| <b>H-Insulin</b>       | 1.17<br>5    | 0.55<br>9     | 2.471 | 0.671          | 1.78<br>2  | 0.67<br>3     | 4.72<br>1  | 0.242          | 0.72         | 0.20<br>4     | 2.545 | 0.611          |
| <b>H-Glucose</b>       | 1.06<br>1    | 0.23<br>7     | 4.742 | 0.939          | 1.03<br>8  | 0.12<br>5     | 8.58<br>4  | 0.973          | 1.09<br>4    | 0.13<br>1     | 9.156 | 0.934          |
| <b>H-HOMA</b>          | 0.97<br>1    | 0.44<br>2     | 2.136 | 0.942          | 1.25<br>7  | 0.44<br>3     | 3.56<br>4  | 0.669          | 0.77         | 0.22<br>1     | 2.679 | 0.682          |

|                        |              |               |                       |            |               |                       |              |               |                       |           |               |                       |
|------------------------|--------------|---------------|-----------------------|------------|---------------|-----------------------|--------------|---------------|-----------------------|-----------|---------------|-----------------------|
| H-Cholesterol          | 0.72<br>2    | 0.25<br>1     | 2.079                 | 0.545      | 0.95<br>2     | 0.27<br>1             | 3.34<br>9    | 0.939         | 0.43<br>4             | 0.05<br>6 | 3.36          | 0.412                 |
| H-Triglycerides        | 1.14<br>6    | 0.62<br>1     | 2.114                 | 0.664      | 1.26          | 0.55<br>2             | 2.87<br>7    | 0.585         | 1.05                  | 0.41<br>3 | 2.672         | 0.919                 |
| L-HDL                  | 1.06<br>3    | 0.62<br>8     | 1.798                 | 0.821      | 1.04<br>9     | 0.44<br>7             | 2.46<br>1    | 0.913         | 1.04<br>3             | 0.52      | 2.091         | 0.907                 |
| H-LDL                  | 0.62<br>4    | 0.14<br>4     | 2.696                 | 0.525      | 1.11<br>3     | 0.24<br>2             | 5.11<br>2    | 0.891         | 0.96<br>4             | 0.94<br>2 | 0.986         | 0.246                 |
| <b>rs2035415</b>       |              |               |                       |            |               |                       |              |               |                       |           |               |                       |
|                        | <b>Total</b> |               |                       | <b>Men</b> |               |                       | <b>Women</b> |               |                       |           |               |                       |
| <b>Clinical marker</b> | <b>OR</b>    | <b>95% CI</b> | <b><i>p</i>-value</b> | <b>OR</b>  | <b>95% CI</b> | <b><i>p</i>-value</b> | <b>OR</b>    | <b>95% CI</b> | <b><i>p</i>-value</b> | <b>OR</b> | <b>95% CI</b> | <b><i>p</i>-value</b> |
| H-BMI                  | 1.03<br>2    | 0.70<br>1     | 1.522                 | 0.872      | 0.93          | 0.52<br>8             | 1.63<br>8    | 0.803         | 1.11                  | 0.65      | 1.895         | 0.705                 |
| H- Waist               | 0.79<br>7    | 0.54<br>3     | 1.17                  | 0.247      | 0.86<br>8     | 0.47<br>1             | 1.59<br>9    | 0.65          | 0.79<br>2             | 0.47<br>9 | 1.31          | 0.365                 |
| H-WHI                  | 0.92<br>4    | 0.64<br>2     | 1.331                 | 0.672      | 0.93<br>1     | 0.54                  | 1.60<br>4    | 0.797         | 0.76<br>6             | 0.44<br>9 | 1.308         | 0.331                 |
| H-WHR                  | 1.06<br>8    | 0.74          | 1.542                 | 0.725      | 1.17<br>8     | 0.68                  | 2.03<br>8    | 0.56          | 0.98<br>6             | 0.6       | 1.621         | 0.956                 |
| H-%BF                  | 0.97         | 0.67<br>1     | 1.403                 | 0.872      | 1.07<br>8     | 0.62<br>2             | 1.87         | 0.789         | 0.86<br>1             | 0.52<br>2 | 1.42          | 0.56                  |
| H-Insulin              | 0.75<br>3    | 0.43<br>6     | 1.3                   | 0.308      | 0.67<br>8     | 0.32<br>6             | 1.41<br>1    | 0.299         | 0.83<br>2             | 0.35<br>9 | 1.928         | 0.669                 |
| H-Glucose              | 1.21<br>4    | 0.39          | 3.779                 | 0.738      | 2.67<br>9     | 0.32<br>9             | 21.8<br>02   | 0.34          | 0.68<br>5             | 0.16      | 2.93          | 0.61                  |
| H-HOMA                 | 0.94<br>6    | 0.55          | 1.628                 | 0.842      | 0.67<br>4     | 0.33<br>2             | 1.36<br>7    | 0.274         | 1.40<br>8             | 0.58<br>2 | 3.407         | 0.447                 |
| H-Cholesterol          | 1.57<br>6    | 0.74<br>3     | 3.344                 | 0.233      | 1.03<br>2     | 0.42<br>1             | 2.52<br>7    | 0.946         | 3.27<br>2             | 0.73<br>3 | 14.61         | 0.102                 |
| H-Triglycerides        | 1.00<br>3    | 0.64<br>1     | 1.569                 | 0.991      | 0.80<br>4     | 0.43<br>9             | 1.47         | 0.479         | 1.22                  | 0.61<br>5 | 2.421         | 0.571                 |
| L-HDL                  | 1.01<br>9    | 0.7           | 1.484                 | 0.922      | 1.19<br>6     | 0.63<br>4             | 2.25<br>5    | 0.582         | 1.01<br>7             | 0.62<br>3 | 1.661         | 0.946                 |
| H-LDL                  | 1.31<br>6    | 0.52<br>1     | 3.32                  | 0.561      | 0.77<br>3     | 0.26<br>3             | 2.27<br>4    | 0.64          | 3.85<br>7             | 0.48<br>2 | 30.89<br>6    | 0.173                 |
| <b>rs17041402</b>      |              |               |                       |            |               |                       |              |               |                       |           |               |                       |
|                        | <b>Total</b> |               |                       | <b>Men</b> |               |                       | <b>Women</b> |               |                       |           |               |                       |
| <b>Clinical marker</b> | <b>OR</b>    | <b>95% CI</b> | <b><i>p</i>-value</b> | <b>OR</b>  | <b>95% CI</b> | <b><i>p</i>-value</b> | <b>OR</b>    | <b>95% CI</b> | <b><i>p</i>-value</b> | <b>OR</b> | <b>95% CI</b> | <b><i>p</i>-value</b> |
| H-BMI                  | 1.42<br>6    | 0.53<br>4     | 3.806                 | 0.477      | 0.61<br>6     | 0.06<br>3             | 5.99<br>8    | 0.675         | 1.92<br>6             | 0.62<br>9 | 5.895         | 0.245                 |
| H- Waist               | 1.22<br>6    | 0.44<br>6     | 3.366                 | 0.693      | 1.01<br>4     | 0.10<br>4             | 9.90<br>9    | 0.99          | 1.08<br>2             | 0.34<br>5 | 3.391         | 0.893                 |
| H-WHI                  | 0.55<br>8    | 0.19<br>4     | 1.606                 | 0.274      | 0.72<br>6     | 0.10<br>1             | 5.22<br>5    | 0.75          | 0.76<br>6             | 0.20<br>6 | 2.854         | 0.692                 |
| H-WHR                  | 0.92<br>7    | 0.34<br>8     | 2.469                 | 0.879      | 0.43<br>7     | 0.04<br>5             | 4.25<br>4    | 0.466         | 1.14<br>5             | 0.37<br>6 | 3.491         | 0.812                 |
| H-%BF                  | 0.92<br>2    | 0.35          | 2.423                 | 0.869      | 0.91<br>5     | 0.12<br>7             | 6.59<br>3    | 0.93          | 1.00<br>2             | 0.32<br>9 | 3.057         | 0.997                 |
| H-Insulin              | 0.81<br>4    | 0.77<br>7     | 0.852                 | 0.132      | 0.76<br>6     | 0.71                  | 0.82<br>8    | 0.438         | 0.85<br>6             | 0.81<br>1 | 0.905         | 0.25                  |
| H-Glucose              | 0.97<br>1    | 0.95<br>7     | 0.985                 | 0.476      | 0.96<br>8     | 0.94<br>8             | 0.98<br>9    | 0.719         | 0.97<br>3             | 0.95<br>5 | 0.992         | 0.551                 |

|                        |              |               |       |                |            |               |            |                |              |               |       |                |
|------------------------|--------------|---------------|-------|----------------|------------|---------------|------------|----------------|--------------|---------------|-------|----------------|
| <b>H-HOMA</b>          | 0.85<br>7    | 0.82<br>8     | 0.887 | 0.104          | 0.82<br>1  | 0.77<br>5     | 0.87       | 0.353          | 0.89         | 0.85<br>4     | 0.927 | 0.225          |
| <b>H-Cholesterol</b>   | 0.91<br>9    | 0.89<br>7     | 0.942 | 0.223          | 0.89<br>8  | 0.86<br>3     | 0.93<br>4  | 0.502          | 0.94         | 0.91<br>3     | 0.967 | 0.363          |
| <b>H-Triglycerides</b> | 0.79         | 0.75<br>8     | 0.824 | 0.034          | 0.74<br>6  | 0.69<br>8     | 0.79<br>9  | 0.246          | 0.83<br>2    | 0.79<br>1     | 0.876 | 0.108          |
| <b>L-HDL</b>           | 2.60<br>7    | 0.97<br>8     | 6.952 | 0.047          | 9.34<br>8  | 0.95<br>7     | 91.3<br>32 | 0.02           | 1.37<br>1    | 0.45          | 4.177 | 0.579          |
| <b>H-LDL</b>           | 0.95<br>4    | 0.93<br>7     | 0.971 | 0.364          | 0.94       | 0.91<br>3     | 0.96<br>8  | 0.615          | 0.96<br>6    | 0.94<br>6     | 0.987 | 0.504          |
| <b>rs59111930</b>      |              |               |       |                |            |               |            |                |              |               |       |                |
|                        | <b>Total</b> |               |       |                | <b>Men</b> |               |            |                | <b>Women</b> |               |       |                |
| <b>Clinical marker</b> | <b>OR</b>    | <b>95% CI</b> |       | <b>p-value</b> | <b>OR</b>  | <b>95% CI</b> |            | <b>p-value</b> | <b>OR</b>    | <b>95% CI</b> |       | <b>p-value</b> |
| <b>H-BMI</b>           | 0.75<br>3    | 0.53<br>3     | 1.064 | 0.108          | 0.71<br>8  | 0.43<br>9     | 1.17<br>4  | 0.187          | 0.77         | 0.47<br>2     | 1.256 | 0.295          |
| <b>H-Waist</b>         | 0.80<br>6    | 0.56<br>9     | 1.142 | 0.226          | 0.65<br>6  | 0.38<br>3     | 1.12<br>5  | 0.125          | 0.99<br>5    | 0.62<br>5     | 1.584 | 0.983          |
| <b>H-WHI</b>           | 1.03         | 0.74<br>3     | 1.426 | 0.86           | 0.86<br>3  | 0.53<br>8     | 1.38<br>4  | 0.542          | 1.04<br>6    | 0.63<br>6     | 1.722 | 0.859          |
| <b>H-WHR</b>           | 0.93<br>3    | 0.67<br>3     | 1.293 | 0.677          | 0.95<br>4  | 0.59<br>6     | 1.52<br>9  | 0.846          | 0.91<br>2    | 0.57<br>9     | 1.437 | 0.692          |
| <b>H-%BF</b>           | 0.91         | 0.65<br>5     | 1.265 | 0.577          | 0.95       | 0.59          | 1.52<br>9  | 0.833          | 0.84<br>6    | 0.53<br>5     | 1.34  | 0.478          |
| <b>H-Insulin</b>       | 0.89<br>8    | 0.54<br>8     | 1.472 | 0.671          | 0.67<br>2  | 0.34<br>7     | 1.30<br>3  | 0.24           | 1.30<br>1    | 0.60<br>4     | 2.802 | 0.503          |
| <b>H-Glucose</b>       | 0.90<br>2    | 0.33<br>4     | 2.436 | 0.839          | 0.98<br>6  | 0.25<br>9     | 3.74<br>8  | 0.983          | 0.76<br>5    | 0.16<br>8     | 3.476 | 0.729          |
| <b>H-HOMA</b>          | 0.99<br>9    | 0.61<br>5     | 1.623 | 0.997          | 0.65<br>6  | 0.34<br>4     | 1.25<br>2  | 0.201          | 1.64<br>5    | 0.76<br>8     | 3.526 | 0.199          |
| <b>H-Cholesterol</b>   | 1.50<br>4    | 0.81<br>6     | 2.771 | 0.189          | 0.96<br>8  | 0.44<br>7     | 2.09<br>4  | 0.934          | 2.82<br>3    | 0.98<br>1     | 8.121 | 0.046          |
| <b>H-Triglycerides</b> | 0.71<br>7    | 0.48<br>1     | 1.069 | 0.102          | 0.5        | 0.29<br>1     | 0.85<br>9  | 0.011          | 1.03<br>1    | 0.56<br>3     | 1.889 | 0.921          |
| <b>L-HDL</b>           | 0.71<br>7    | 0.51<br>3     | 1.003 | 0.052          | 0.58<br>2  | 0.34          | 0.99<br>5  | 0.047          | 0.89<br>8    | 0.57<br>5     | 1.404 | 0.638          |
| <b>H-LDL</b>           | 1.33<br>3    | 0.60<br>8     | 2.922 | 0.473          | 1.13<br>5  | 0.42          | 3.07<br>1  | 0.803          | 1.56<br>1    | 0.43<br>2     | 5.645 | 0.495          |
| <b>rs74874270</b>      |              |               |       |                |            |               |            |                |              |               |       |                |
|                        | <b>Total</b> |               |       |                | <b>Men</b> |               |            |                | <b>Women</b> |               |       |                |
| <b>Clinical marker</b> | <b>OR</b>    | <b>95% CI</b> |       | <b>p-value</b> | <b>OR</b>  | <b>95% CI</b> |            | <b>p-value</b> | <b>OR</b>    | <b>95% CI</b> |       | <b>p-value</b> |
| <b>H-BMI</b>           | 0.38<br>7    | 0.14<br>6     | 1.028 | 0.049          | 0.27<br>1  | 0.06          | 1.22<br>7  | 0.071          | 0.53         | 0.14<br>6     | 1.923 | 0.329          |
| <b>H-Waist</b>         | 0.84<br>4    | 0.36<br>7     | 1.943 | 0.691          | 0.45<br>3  | 0.1           | 2.05<br>6  | 0.295          | 1.31<br>1    | 0.44<br>3     | 3.878 | 0.625          |
| <b>H-WHI</b>           | 0.70<br>5    | 0.32<br>2     | 1.543 | 0.38           | 0.62<br>2  | 0.21<br>9     | 1.76<br>4  | 0.37           | 0.69<br>3    | 0.18<br>9     | 2.548 | 0.581          |
| <b>H-WHR</b>           | 0.68<br>6    | 0.31<br>3     | 1.502 | 0.344          | 0.46<br>4  | 0.14<br>4     | 1.49<br>5  | 0.19           | 0.99<br>6    | 0.33<br>7     | 2.944 | 0.994          |
| <b>H-%BF</b>           | 0.83<br>7    | 0.39<br>5     | 1.773 | 0.642          | 0.79<br>2  | 0.27<br>9     | 2.24<br>8  | 0.662          | 0.87<br>1    | 0.29<br>5     | 2.576 | 0.804          |
| <b>H-Insulin</b>       | 1.52<br>5    | 0.47<br>8     | 4.863 | 0.474          | 0.82<br>8  | 0.09          | 7.59<br>5  | 0.868          | 2.47<br>8    | 0.62          | 9.899 | 0.187          |

|                        |              |               |       |                |            |               |            |                |              |               |            |                |
|------------------------|--------------|---------------|-------|----------------|------------|---------------|------------|----------------|--------------|---------------|------------|----------------|
| <b>H-Glucose</b>       | 1.19<br>2    | 0.15<br>3     | 9.3   | 0.867          | 2.36<br>6  | 0.27<br>6     | 20.2<br>56 | 0.42           | 0.97<br>3    | 0.95<br>5     | 0.992      | 0.53           |
| <b>H-HOMA</b>          | 1.25<br>6    | 0.41<br>7     | 3.779 | 0.686          | 0.45<br>5  | 0.05<br>7     | 3.64<br>3  | 0.449          | 2.7          | 0.70<br>1     | 10.39<br>4 | 0.135          |
| <b>H-Cholesterol</b>   | 0.91<br>7    | 0.89<br>5     | 0.94  | 0.101          | 0.89<br>4  | 0.85<br>8     | 0.93<br>1  | 0.184          | 0.93<br>9    | 0.91<br>2     | 0.967      | 0.327          |
| <b>H-Triglycerides</b> | 0.26<br>7    | 0.06<br>3     | 1.138 | 0.056          | 0.20<br>3  | 0.02<br>6     | 1.57<br>3  | 0.093          | 0.36         | 0.04<br>6     | 2.802      | 0.311          |
| <b>L-HDL</b>           | 1.37<br>9    | 0.65<br>6     | 2.896 | 0.395          | 1.09<br>6  | 0.33<br>8     | 3.55<br>6  | 0.879          | 1.78<br>9    | 0.62<br>1     | 5.153      | 0.277          |
| <b>H-LDL</b>           | 0.95<br>3    | 0.93<br>5     | 0.97  | 0.223          | 0.93<br>8  | 0.90<br>9     | 0.96<br>7  | 0.321          | 0.96<br>6    | 0.94<br>6     | 0.987      | 0.471          |
| <b>rs1384331</b>       |              |               |       |                |            |               |            |                |              |               |            |                |
|                        | <b>Total</b> |               |       |                | <b>Men</b> |               |            |                | <b>Women</b> |               |            |                |
| <b>Clinical marker</b> | <b>OR</b>    | <b>95% CI</b> |       | <b>p-value</b> | <b>OR</b>  | <b>95% CI</b> |            | <b>p-value</b> | <b>OR</b>    | <b>95% CI</b> |            | <b>p-value</b> |
| <b>H-BMI</b>           | 0.95<br>1    | 0.66<br>3     | 1.365 | 0.787          | 0.88<br>5  | 0.52<br>9     | 1.48       | 0.642          | 1.01         | 0.60<br>8     | 1.678      | 0.968          |
| <b>H-Waist</b>         | 0.87<br>8    | 0.61<br>1     | 1.262 | 0.483          | 0.92       | 0.52<br>4     | 1.61<br>6  | 0.773          | 0.86<br>6    | 0.53<br>5     | 1.401      | 0.559          |
| <b>H-WHI</b>           | 0.91<br>2    | 0.64<br>9     | 1.283 | 0.598          | 0.88<br>6  | 0.53<br>9     | 1.45<br>6  | 0.633          | 0.86<br>5    | 0.51<br>7     | 1.448      | 0.582          |
| <b>H-WHR</b>           | 1.07<br>6    | 0.76<br>4     | 1.516 | 0.675          | 1.15<br>8  | 0.70<br>4     | 1.90<br>5  | 0.565          | 1.00<br>7    | 0.62<br>7     | 1.618      | 0.976          |
| <b>H-%BF</b>           | 1.00<br>3    | 0.71          | 1.416 | 0.988          | 0.93<br>7  | 0.56<br>7     | 1.54<br>6  | 0.799          | 1.05<br>1    | 0.65<br>2     | 1.696      | 0.838          |
| <b>H-Insulin</b>       | 0.80<br>3    | 0.48<br>1     | 1.341 | 0.402          | 0.71<br>1  | 0.35<br>9     | 1.40<br>9  | 0.33           | 0.92<br>3    | 0.41<br>7     | 2.043      | 0.845          |
| <b>H-Glucose</b>       | 1.28<br>3    | 0.44<br>6     | 3.691 | 0.644          | 4.19<br>7  | 0.51<br>7     | 34.0<br>48 | 0.147          | 0.54<br>4    | 0.13<br>3     | 2.217      | 0.39           |
| <b>H-HOMA</b>          | 0.93<br>7    | 0.56<br>4     | 1.555 | 0.801          | 0.68<br>8  | 0.35<br>4     | 1.33<br>5  | 0.269          | 1.38<br>4    | 0.61<br>2     | 3.13       | 0.435          |
| <b>H-Cholesterol</b>   | 1.37<br>9    | 0.70<br>9     | 2.683 | 0.342          | 0.96<br>1  | 0.42<br>8     | 2.15<br>6  | 0.924          | 2.69<br>9    | 0.75<br>8     | 9.606      | 0.113          |
| <b>H-Triglycerides</b> | 0.87<br>1    | 0.57<br>6     | 1.319 | 0.516          | 0.63       | 0.36<br>3     | 1.09<br>1  | 0.098          | 1.30<br>5    | 0.67<br>6     | 2.52       | 0.428          |
| <b>L-HDL</b>           | 1.19<br>7    | 0.84          | 1.706 | 0.321          | 1.44       | 0.80<br>2     | 2.58<br>8  | 0.222          | 1.11<br>4    | 0.69<br>8     | 1.779      | 0.651          |
| <b>H-LDL</b>           | 0.89<br>8    | 0.40<br>3     | 1.998 | 0.792          | 1.23<br>4  | 0.42<br>2     | 3.60<br>7  | 0.702          | 0.54<br>1    | 0.15<br>3     | 1.912      | 0.335          |
| <b>rs72679246</b>      |              |               |       |                |            |               |            |                |              |               |            |                |
|                        | <b>Total</b> |               |       |                | <b>Men</b> |               |            |                | <b>Women</b> |               |            |                |
| <b>Clinical marker</b> | <b>OR</b>    | <b>95% CI</b> |       | <b>p-value</b> | <b>OR</b>  | <b>95% CI</b> |            | <b>p-value</b> | <b>OR</b>    | <b>95% CI</b> |            | <b>p-value</b> |
| <b>H-BMI</b>           | 0.33<br>3    | 0.07<br>4     | 1.505 | 0.134          | 0.74<br>5  | 0.14<br>2     | 3.91<br>2  | 0.728          | 0.68<br>2    | 0.63          | 0.738      | 0.073          |
| <b>H-Waist</b>         | 0.36<br>4    | 0.08<br>1     | 1.645 | 0.172          | 0.51<br>2  | 0.06<br>1     | 4.33<br>3  | 0.534          | 0.27<br>4    | 0.03<br>3     | 2.308      | 0.205          |
| <b>H-WHI</b>           | 0.76<br>1    | 0.25<br>2     | 2.3   | 0.628          | 0.56<br>3  | 0.12<br>4     | 2.56<br>2  | 0.453          | 1.02         | 0.19<br>4     | 5.36       | 0.982          |
| <b>H-WHR</b>           | 0.54<br>1    | 0.16<br>8     | 1.746 | 0.298          | 0.54<br>6  | 0.10<br>4     | 2.86<br>5  | 0.47           | 0.53<br>7    | 0.10<br>2     | 2.812      | 0.456          |
| <b>H-%BF</b>           | 0.41<br>5    | 0.12<br>9     | 1.34  | 0.13           | 0.70<br>6  | 0.15<br>5     | 3.21<br>4  | 0.652          | 0.19         | 0.02<br>3     | 1.595      | 0.089          |

|                        |              |               |            |                |            |               |            |                |              |               |             |                |
|------------------------|--------------|---------------|------------|----------------|------------|---------------|------------|----------------|--------------|---------------|-------------|----------------|
| <b>H-Insulin</b>       | 0.82         | 0.78<br>3     | 0.858      | 0.106          | 0.77<br>2  | 0.71<br>5     | 0.83<br>5  | 0.188          | 0.86<br>2    | 0.81<br>6     | 0.91        | 0.33           |
| <b>H-Glucose</b>       | 6.14<br>4    | 1.26<br>3     | 29.90<br>2 | 0.011          | 0.96<br>7  | 0.94<br>6     | 0.98<br>8  | 0.627          | 19.2         | 3.08<br>5     | 119.4<br>85 | 0.001          |
| <b>H-HOMA</b>          | 0.86         | 0.83          | 0.89       | 0.132          | 0.82<br>3  | 0.77<br>6     | 0.87<br>2  | 0.223          | 0.89<br>2    | 0.85<br>6     | 0.929       | 0.359          |
| <b>H-Cholesterol</b>   | 0.87<br>3    | 0.11<br>2     | 6.823      | 0.897          | 1.46<br>4  | 0.17          | 12.6<br>06 | 0.728          | 0.93<br>9    | 0.91<br>2     | 0.967       | 0.501          |
| <b>H-Triglycerides</b> | 0.28<br>7    | 0.03<br>7     | 2.217      | 0.203          | 0.48<br>6  | 0.05<br>7     | 4.10<br>5  | 0.5            | 0.83         | 0.78<br>8     | 0.874       | 0.234          |
| <b>L-HDL</b>           | 1.36<br>9    | 0.46<br>9     | 4.002      | 0.565          | 2.36<br>4  | 0.51<br>6     | 10.8<br>32 | 0.256          | 0.88<br>3    | 0.19<br>4     | 4.016       | 0.873          |
| <b>H-LDL</b>           | 0.95<br>4    | 0.93<br>7     | 0.972      | 0.414          | 0.93<br>8  | 0.91          | 0.96<br>7  | 0.498          | 0.96<br>9    | 0.95          | 0.989       | 0.64           |
| <b>rs78563565</b>      |              |               |            |                |            |               |            |                |              |               |             |                |
|                        | <b>Total</b> |               |            |                | <b>Men</b> |               |            |                | <b>Women</b> |               |             |                |
| <b>Clinical marker</b> | <b>OR</b>    | <b>95% CI</b> |            | <b>p-value</b> | <b>OR</b>  | <b>95% CI</b> |            | <b>p-value</b> | <b>OR</b>    | <b>95% CI</b> |             | <b>p-value</b> |
| <b>H-BMI</b>           | 1.27<br>4    | 0.56<br>7     | 2.862      | 0.558          | 0.92<br>6  | 0.27<br>2     | 3.15<br>6  | 0.903          | 1.67<br>7    | 0.56<br>5     | 4.976       | 0.349          |
| <b>H- Waist</b>        | 0.81<br>6    | 0.33<br>7     | 1.976      | 0.652          | 0.59<br>7  | 0.12<br>8     | 2.79<br>2  | 0.51           | 0.95<br>7    | 0.31<br>3     | 2.928       | 0.939          |
| <b>H-WHI</b>           | 0.84<br>5    | 0.37<br>7     | 1.893      | 0.682          | 0.71<br>9  | 0.22<br>6     | 2.28<br>5  | 0.576          | 1.03<br>4    | 0.31<br>5     | 3.39        | 0.956          |
| <b>H-WHR</b>           | 0.82<br>2    | 0.36<br>7     | 1.844      | 0.635          | 0.94<br>4  | 0.29<br>2     | 3.05       | 0.924          | 0.72<br>8    | 0.23<br>8     | 2.224       | 0.577          |
| <b>H-%BF</b>           | 0.68<br>1    | 0.30<br>1     | 1.544      | 0.356          | 0.44<br>3  | 0.13          | 1.50<br>7  | 0.183          | 1.00<br>2    | 0.32<br>9     | 3.057       | 0.997          |
| <b>H-Insulin</b>       | 0.99<br>8    | 0.32<br>8     | 3.038      | 0.998          | 1.45<br>5  | 0.36<br>1     | 5.86<br>9  | 0.598          | 0.55<br>2    | 0.06<br>9     | 4.429       | 0.572          |
| <b>H-Glucose</b>       | 0.97         | 0.95<br>7     | 0.984      | 0.374          | 0.96<br>7  | 0.94<br>7     | 0.98<br>9  | 0.527          | 0.97<br>3    | 0.95<br>5     | 0.992       | 0.535          |
| <b>H-HOMA</b>          | 0.80<br>2    | 0.23<br>5     | 2.74       | 0.725          | 0.93       | 0.19<br>7     | 4.39<br>8  | 0.928          | 0.63<br>8    | 0.08<br>1     | 5.054       | 0.67           |
| <b>H-Cholesterol</b>   | 0.45<br>8    | 0.06<br>1     | 3.459      | 0.439          | 0.80<br>5  | 0.1           | 6.47<br>1  | 0.839          | 0.93<br>9    | 0.91<br>3     | 0.967       | 0.344          |
| <b>H-Triglycerides</b> | 1.78<br>9    | 0.75<br>9     | 4.219      | 0.179          | 2.22<br>8  | 0.68<br>5     | 7.25<br>2  | 0.174          | 1.45<br>1    | 0.39          | 5.398       | 0.578          |
| <b>L-HDL</b>           | 1.55         | 0.70<br>4     | 3.415      | 0.274          | 1.52<br>9  | 0.44<br>7     | 5.23<br>8  | 0.498          | 1.57<br>8    | 0.53<br>5     | 4.661       | 0.407          |
| <b>H-LDL</b>           | 0.84<br>2    | 0.11          | 6.453      | 0.868          | 1.47<br>7  | 0.17<br>9     | 12.1<br>66 | 0.716          | 0.96<br>6    | 0.94<br>6     | 0.987       | 0.487          |
| <b>rs6533498</b>       |              |               |            |                |            |               |            |                |              |               |             |                |
|                        | <b>Total</b> |               |            |                | <b>Men</b> |               |            |                | <b>Women</b> |               |             |                |
| <b>Clinical marker</b> | <b>OR</b>    | <b>95% CI</b> |            | <b>p-value</b> | <b>OR</b>  | <b>95% CI</b> |            | <b>p-value</b> | <b>OR</b>    | <b>95% CI</b> |             | <b>p-value</b> |
| <b>H-BMI</b>           | 1.03<br>9    | 0.73<br>5     | 1.468      | 0.83           | 0.78<br>8  | 0.48<br>3     | 1.28<br>6  | 0.341          | 1.37         | 0.83<br>7     | 2.242       | 0.211          |
| <b>H- Waist</b>        | 1.07<br>4    | 0.75<br>8     | 1.524      | 0.688          | 0.74<br>9  | 0.43<br>8     | 1.28<br>2  | 0.293          | 1.42<br>6    | 0.89<br>3     | 2.279       | 0.138          |
| <b>H-WHI</b>           | 1.08         | 0.78          | 1.497      | 0.644          | 1.02<br>9  | 0.64<br>4     | 1.64<br>6  | 0.904          | 1.13<br>1    | 0.68<br>6     | 1.865       | 0.63           |
| <b>H-WHR</b>           | 1.11<br>1    | 0.80<br>1     | 1.54       | 0.529          | 0.92<br>4  | 0.57<br>8     | 1.47<br>8  | 0.744          | 1.32<br>1    | 0.83<br>7     | 2.087       | 0.233          |

|                        |              |               |       |                |            |               |            |                |              |               |            |                |
|------------------------|--------------|---------------|-------|----------------|------------|---------------|------------|----------------|--------------|---------------|------------|----------------|
| <b>H-%BF</b>           | 1.15<br>7    | 0.83<br>3     | 1.609 | 0.385          | 0.90<br>6  | 0.56<br>4     | 1.45<br>4  | 0.683          | 1.45<br>7    | 0.91<br>8     | 2.313      | 0.11           |
| <b>H-Insulin</b>       | 0.76<br>8    | 0.46<br>8     | 1.261 | 0.297          | 0.79<br>4  | 0.41          | 1.53<br>6  | 0.495          | 0.72<br>7    | 0.33<br>9     | 1.557      | 0.412          |
| <b>H-Glucose</b>       | 0.90<br>2    | 0.33<br>4     | 2.436 | 0.839          | 0.69<br>8  | 0.18<br>4     | 2.65<br>4  | 0.597          | 1.24         | 0.27<br>3     | 5.634      | 0.781          |
| <b>H-HOMA</b>          | 0.90<br>7    | 0.55<br>9     | 1.472 | 0.693          | 0.95       | 0.49<br>9     | 1.81       | 0.878          | 0.84<br>9    | 0.40<br>3     | 1.788      | 0.667          |
| <b>H-Cholesterol</b>   | 0.71<br>1    | 0.39<br>1     | 1.294 | 0.264          | 0.59<br>1  | 0.27<br>1     | 1.28<br>7  | 0.183          | 0.92<br>1    | 0.35<br>5     | 2.386      | 0.866          |
| <b>H-Triglycerides</b> | 0.99<br>8    | 0.67          | 1.486 | 0.99           | 1.22<br>8  | 0.71<br>8     | 2.10<br>2  | 0.455          | 0.75<br>3    | 0.41          | 1.382      | 0.361          |
| <b>L-HDL</b>           | 1.11         | 0.79<br>4     | 1.551 | 0.542          | 1.32<br>4  | 0.77<br>2     | 2.27<br>1  | 0.308          | 1.01<br>1    | 0.64<br>7     | 1.581      | 0.961          |
| <b>H-LDL</b>           | 0.71<br>3    | 0.32<br>8     | 1.549 | 0.391          | 0.46       | 0.16<br>5     | 1.28       | 0.13           | 1.40<br>3    | 0.38<br>8     | 5.073      | 0.605          |
| <b>rs 9997926</b>      |              |               |       |                |            |               |            |                |              |               |            |                |
|                        | <b>Total</b> |               |       |                | <b>Men</b> |               |            |                | <b>Women</b> |               |            |                |
| <b>Clinical marker</b> | <b>OR</b>    | <b>95% CI</b> |       | <b>p-value</b> | <b>OR</b>  | <b>95% CI</b> |            | <b>p-value</b> | <b>OR</b>    | <b>95% CI</b> |            | <b>p-value</b> |
| <b>H-BMI</b>           | 1.16<br>8    | 0.63<br>6     | 2.146 | 0.617          | 1.21<br>3  | 0.54<br>4     | 2.70<br>4  | 0.637          | 1.07<br>5    | 0.41<br>9     | 2.757      | 0.881          |
| <b>H- Waist</b>        | 1.27<br>9    | 0.69<br>8     | 2.345 | 0.426          | 1.49       | 0.64<br>1     | 3.46<br>1  | 0.353          | 1.20<br>8    | 0.49<br>9     | 2.925      | 0.676          |
| <b>H-WHI</b>           | 1.97<br>5    | 1.09<br>8     | 3.553 | 0.021          | 2.35<br>4  | 0.96<br>7     | 5.73<br>4  | 0.054          | 1.50<br>6    | 0.60<br>8     | 3.733      | 0.375          |
| <b>H-WHR</b>           | 0.94<br>7    | 0.52<br>6     | 1.703 | 0.855          | 1.15       | 0.52<br>6     | 2.51<br>6  | 0.727          | 0.73<br>7    | 0.29<br>9     | 1.813      | 0.506          |
| <b>H-%BF</b>           | 1.24<br>2    | 0.67<br>8     | 2.275 | 0.483          | 1.16<br>2  | 0.52<br>3     | 2.58<br>4  | 0.714          | 1.28<br>9    | 0.50<br>8     | 3.272      | 0.594          |
| <b>H-Insulin</b>       | 2.1          | 0.98<br>5     | 4.478 | 0.051          | 5.71<br>4  | 2.03<br>5     | 16.0<br>48 | 0.001          | 0.31<br>7    | 0.04<br>1     | 2.462      | 0.249          |
| <b>H-Glucose</b>       | 2.34<br>4    | 0.65<br>1     | 8.442 | 0.181          | 2.75<br>8  | 0.54<br>4     | 13.9<br>73 | 0.204          | 1.77<br>9    | 0.20<br>9     | 15.12      | 0.594          |
| <b>H-HOMA</b>          | 1.36<br>1    | 0.60<br>8     | 3.047 | 0.453          | 2.21<br>1  | 0.85<br>2     | 5.73<br>8  | 0.097          | 0.37<br>5    | 0.04<br>9     | 2.886      | 0.329          |
| <b>H-Cholesterol</b>   | 1.32         | 0.49<br>7     | 3.505 | 0.577          | 1.55<br>3  | 0.49<br>9     | 4.83<br>8  | 0.446          | 0.75<br>3    | 0.09<br>5     | 5.946      | 0.788          |
| <b>H-Triglycerides</b> | 1.06         | 0.52<br>7     | 2.134 | 0.87           | 1.46<br>6  | 0.63<br>1     | 3.40<br>4  | 0.373          | 0.46<br>2    | 0.10<br>5     | 2.038      | 0.298          |
| <b>L-HDL</b>           | 0.96<br>2    | 0.52<br>8     | 1.754 | 0.9            | 1.21<br>3  | 0.50<br>9     | 2.88<br>6  | 0.664          | 0.88<br>1    | 0.37<br>4     | 2.075      | 0.772          |
| <b>H-LDL</b>           | 2.55<br>4    | 0.92<br>4     | 7.061 | 0.062          | 3.14<br>1  | 0.94<br>9     | 10.3<br>92 | 0.05           | 1.37<br>4    | 0.16<br>6     | 11.34<br>4 | 0.768          |
| <b>rs 6824447</b>      |              |               |       |                |            |               |            |                |              |               |            |                |
|                        | <b>Total</b> |               |       |                | <b>Men</b> |               |            |                | <b>Women</b> |               |            |                |
| <b>Clinical marker</b> | <b>OR</b>    | <b>95% CI</b> |       | <b>p-value</b> | <b>OR</b>  | <b>95% CI</b> |            | <b>p-value</b> | <b>OR</b>    | <b>95% CI</b> |            | <b>p-value</b> |
| <b>H-BMI</b>           | 0.87<br>5    | 0.61<br>6     | 1.242 | 0.455          | 0.51<br>6  | 0.31<br>3     | 0.85       | 0.009          | 1.50<br>9    | 0.90<br>8     | 2.508      | 0.112          |
| <b>H- Waist</b>        | 0.94<br>3    | 0.66<br>3     | 1.343 | 0.747          | 0.55<br>1  | 0.31<br>9     | 0.95<br>2  | 0.031          | 1.38<br>9    | 0.86<br>1     | 2.242      | 0.179          |
| <b>H-WHI</b>           | 0.87<br>9    | 0.63<br>1     | 1.225 | 0.447          | 0.90<br>5  | 0.56<br>1     | 1.46       | 0.684          | 0.88<br>1    | 0.53<br>1     | 1.462      | 0.624          |

|                 |           |           |       |       |           |           |           |       |           |           |       |       |
|-----------------|-----------|-----------|-------|-------|-----------|-----------|-----------|-------|-----------|-----------|-------|-------|
| H-WHR           | 0.93<br>6 | 0.67<br>1 | 1.305 | 0.696 | 0.71<br>1 | 0.44<br>1 | 1.14<br>5 | 0.161 | 1.21<br>6 | 0.76<br>2 | 1.939 | 0.413 |
| H-%BF           | 1.09<br>7 | 0.78<br>3 | 1.535 | 0.592 | 0.88<br>1 | 0.54<br>4 | 1.42<br>6 | 0.608 | 1.36<br>9 | 0.85<br>3 | 2.199 | 0.194 |
| H-Insulin       | 0.75<br>5 | 0.45<br>9 | 1.243 | 0.27  | 0.81<br>5 | 0.41<br>8 | 1.58<br>7 | 0.549 | 0.73      | 0.34<br>1 | 1.565 | 0.42  |
| H-Glucose       | 0.98<br>8 | 0.36<br>3 | 2.691 | 0.982 | 0.63<br>2 | 0.16<br>6 | 2.40<br>3 | 0.499 | 1.87<br>5 | 0.35<br>8 | 9.822 | 0.452 |
| H-HOMA          | 0.82<br>9 | 0.50<br>8 | 1.352 | 0.453 | 0.81<br>4 | 0.42<br>4 | 1.56<br>3 | 0.538 | 0.88<br>4 | 0.41<br>8 | 1.871 | 0.748 |
| H-Cholesterol   | 0.44<br>7 | 0.24<br>2 | 0.825 | 0.008 | 0.26<br>8 | 0.11<br>4 | 0.62<br>8 | 0.001 | 0.92      | 0.35<br>3 | 2.401 | 0.866 |
| H-Triglycerides | 0.83      | 0.55<br>6 | 1.241 | 0.365 | 1.04<br>6 | 0.60<br>8 | 1.79<br>8 | 0.872 | 0.63<br>2 | 0.34<br>4 | 1.162 | 0.139 |
| L-HDL           | 1.04<br>9 | 0.74<br>6 | 1.475 | 0.783 | 1.04<br>6 | 0.60<br>8 | 1.79<br>8 | 0.872 | 1.02<br>1 | 0.64<br>6 | 1.614 | 0.929 |
| H-LDL           | 0.43<br>5 | 0.19<br>6 | 0.968 | 0.036 | 0.22<br>7 | 0.07<br>2 | 0.71<br>4 | 0.006 | 1.11<br>4 | 0.30<br>8 | 4.031 | 0.87  |

**rs 17041272**

| Clinical marker | Total     |           |                 | Men   |           |                 | Women     |        |                 |           |       |       |
|-----------------|-----------|-----------|-----------------|-------|-----------|-----------------|-----------|--------|-----------------|-----------|-------|-------|
|                 | OR        | 95% CI    | <i>p</i> -value | OR    | 95% CI    | <i>p</i> -value | OR        | 95% CI | <i>p</i> -value |           |       |       |
| H-BMI           | 1.56<br>9 | 1         | 2.46            | 0.049 | 2.06<br>8 | 1.11<br>8       | 3.82<br>6 | 0.019  | 1.11<br>9       | 0.56<br>8 | 2.202 | 0.747 |
| H- Waist        | 1.11<br>2 | 0.69<br>9 | 1.769           | 0.655 | 2.13<br>1 | 1.11<br>6       | 4.06<br>9 | 0.02   | 0.62<br>2       | 0.31<br>3 | 1.24  | 0.176 |
| H-WHI           | 1.08<br>7 | 0.70<br>1 | 1.686           | 0.709 | 1.41<br>7 | 0.75<br>5       | 2.65<br>9 | 0.279  | 0.66<br>5       | 0.31<br>4 | 1.408 | 0.286 |
| H-WHR           | 1.16<br>5 | 0.75<br>2 | 1.804           | 0.495 | 1.63<br>4 | 0.88<br>9       | 3.00<br>4 | 0.113  | 0.80<br>8       | 0.42<br>5 | 1.535 | 0.516 |
| H-%BF           | 1.79<br>4 | 1.13<br>3 | 2.839           | 0.012 | 1.93<br>3 | 1.01<br>6       | 3.68      | 0.043  | 1.61<br>9       | 0.83<br>7 | 3.134 | 0.151 |
| H-Insulin       | 2.14<br>7 | 1.19<br>8 | 3.847           | 0.009 | 2.10<br>1 | 0.96<br>7       | 4.56<br>4 | 0.058  | 2.11<br>3       | 0.85<br>8 | 5.205 | 0.099 |
| H-Glucose       | 1.09<br>7 | 0.30<br>9 | 3.89            | 0.887 | 2.38<br>5 | 0.57<br>6       | 9.87<br>3 | 0.218  | 0.96<br>9       | 0.94<br>8 | 0.99  | 0.229 |
| H-HOMA          | 1.95<br>6 | 1.09<br>6 | 3.491           | 0.021 | 2         | 0.93<br>5       | 4.27<br>9 | 0.071  | 1.80<br>7       | 0.72<br>5 | 4.5   | 0.2   |
| H-Cholesterol   | 1.63<br>1 | 0.79<br>9 | 3.328           | 0.76  | 0.95<br>6 | 0.34<br>6       | 2.63<br>7 | 0.93   | 3.1             | 1.10<br>1 | 8.73  | 0.025 |
| H-Triglycerides | 1.52<br>2 | 0.92<br>2 | 2.513           | 0.099 | 1.15<br>5 | 0.58<br>3       | 2.28<br>6 | 0.681  | 2.06<br>2       | 0.98<br>1 | 4.333 | 0.053 |
| L-HDL           | 1.21<br>9 | 0.78<br>1 | 1.903           | 0.385 | 1.15<br>5 | 0.58<br>3       | 2.28<br>6 | 0.681  | 1.43<br>3       | 0.76<br>3 | 2.688 | 0.263 |
| H-LDL           | 1.48<br>8 | 0.58<br>4 | 3.789           | 0.402 | 0.98<br>7 | 0.27<br>3       | 3.56<br>8 | 0.984  | 2.52<br>2       | 0.62<br>8 | 10.13 | 0.179 |

**ELOVL7**

| <b>rs75621404</b> |           |           |                 |      |           |                 |           |        |                 |      |       |       |
|-------------------|-----------|-----------|-----------------|------|-----------|-----------------|-----------|--------|-----------------|------|-------|-------|
| Clinical marker   | Total     |           |                 | Men  |           |                 | Women     |        |                 |      |       |       |
|                   | OR        | 95% CI    | <i>p</i> -value | OR   | 95% CI    | <i>p</i> -value | OR        | 95% CI | <i>p</i> -value |      |       |       |
| H-BMI             | 1.12<br>9 | 0.37<br>3 | 3.415           | 0.83 | 1.92<br>5 | 0.54<br>3       | 6.81<br>7 | 0.304  | 0.68<br>1       | 0.63 | 0.736 | 0.174 |



|                        |              |               |            |                |            |               |            |                |              |               |            |                |
|------------------------|--------------|---------------|------------|----------------|------------|---------------|------------|----------------|--------------|---------------|------------|----------------|
| <b>H- Waist</b>        | 0.36<br>7    | 0.08<br>1     | 1.659      | 0.176          | 0.33<br>3  | 0.04<br>1     | 2.67<br>9  | 0.38           | 0.57<br>1    | 0.05<br>9     | 5.56       | 0.627          |
| <b>H-WHI</b>           | 1.84<br>9    | 0.63<br>3     | 5.398      | 0.255          | 1.74<br>3  | 0.44<br>1     | 6.88<br>1  | 0.424          | 0.85<br>9    | 0.08<br>8     | 8.371      | 0.896          |
| <b>H-WHR</b>           | 1.80<br>1    | 0.61<br>7     | 5.259      | 0.126          | 1.35       | 0.38<br>2     | 4.77<br>2  | 0.641          | 4.05<br>5    | 0.41<br>7     | 39.43<br>1 | 0.194          |
| <b>H-%BF</b>           | 1.22<br>2    | 0.40<br>6     | 3.683      | 0.721          | 0.92       | 0.26          | 3.25<br>4  | 0.898          | 2.35<br>8    | 0.21<br>1     | 26.29<br>5 | 0.474          |
| <b>H-Insulin</b>       | 0.82<br>3    | 0.17<br>9     | 3.792      | 0.803          | 0.97       | 0.19<br>4     | 4.84<br>3  | 0.971          | 0.85<br>9    | 0.81<br>4     | 0.906      | 0.421          |
| <b>H-Glucose</b>       | 0.97<br>1    | 0.95<br>7     | 0.985      | 0.518          | 0.96<br>8  | 0.94<br>7     | 0.98<br>9  | 0.564          | 0.97<br>4    | 0.95<br>6     | 0.992      | 0.745          |
| <b>H-HOMA</b>          | 0.47<br>7    | 0.06<br>2     | 3.702      | 0.47           | 0.51<br>9  | 0.06<br>4     | 4.20<br>8  | 0.534          | 0.89<br>3    | 0.85<br>8     | 0.929      | 0.49           |
| <b>H-Cholesterol</b>   | 0.9          | 0.11<br>5     | 7.031      | 0.92           | 0.98<br>8  | 0.12<br>1     | 8.09       | 0.991          | 0.94<br>1    | 0.91<br>5     | 0.968      | 0.619          |
| <b>H-Triglycerides</b> | 1.59<br>7    | 0.49<br>2     | 5.181      | 0.433          | 1.31<br>7  | 0.33<br>1     | 5.23<br>5  | 0.696          | 1.75<br>5    | 0.17<br>9     | 17.22<br>2 | 0.626          |
| <b>L-HDL</b>           | 0.98<br>2    | 0.32<br>5     | 2.969      | 0.975          | 0.73<br>9  | 0.15<br>3     | 3.56<br>4  | 0.707          | 3.53<br>2    | 0.36<br>3     | 34.33<br>3 | 0.248          |
| <b>H-LDL</b>           | 1.65<br>1    | 0.20<br>8     | 13.10<br>4 | 0.632          | 1.81<br>3  | 0.21<br>6     | 15.2<br>03 | 0.58           | 0.96<br>7    | 0.94<br>8     | 0.987      | 0.715          |
| <b>rs1563517</b>       |              |               |            |                |            |               |            |                |              |               |            |                |
|                        | <b>Total</b> |               |            |                | <b>Men</b> |               |            |                | <b>Women</b> |               |            |                |
| <b>Clinical marker</b> | <b>OR</b>    | <b>95% CI</b> |            | <b>p-value</b> | <b>OR</b>  | <b>95% CI</b> |            | <b>p-value</b> | <b>OR</b>    | <b>95% CI</b> |            | <b>p-value</b> |
| <b>H-BMI</b>           | 1.09<br>2    | 0.75<br>2     | 1.585      | 0.646          | 1.09<br>5  | 0.64<br>1     | 1.87<br>1  | 0.74           | 1.09<br>9    | 0.65<br>3     | 1.852      | 0.723          |
| <b>H- Waist</b>        | 1.51<br>7    | 1.04<br>9     | 2.194      | 0.027          | 1.23<br>8  | 0.69<br>3     | 2.21       | 0.472          | 1.71<br>6    | 1.05<br>1     | 2.801      | 0.03           |
| <b>H-WHI</b>           | 1.21<br>3    | 0.85<br>3     | 1.724      | 0.283          | 0.94       | 0.56<br>1     | 1.57<br>5  | 0.816          | 1.80<br>6    | 1.07<br>5     | 3.033      | 0.025          |
| <b>H-WHR</b>           | 1.13<br>2    | 0.79<br>5     | 1.613      | 0.492          | 1.11<br>9  | 0.66<br>7     | 1.87<br>5  | 0.672          | 1.14<br>5    | 0.70<br>4     | 1.861      | 0.586          |
| <b>H-%BF</b>           | 0.99         | 0.69<br>4     | 1.413      | 0.957          | 0.93<br>9  | 0.55<br>8     | 1.58<br>1  | 0.814          | 1.05<br>9    | 0.64<br>9     | 1.726      | 0.819          |
| <b>H-Insulin</b>       | 1.84<br>4    | 1.10<br>7     | 3.074      | 0.018          | 1.26<br>7  | 0.62<br>2     | 2.58<br>2  | 0.516          | 3.12<br>6    | 1.44<br>1     | 6.778      | 0.003          |
| <b>H-Glucose</b>       | 2.05<br>7    | 0.78<br>1     | 5.42       | 0.137          | 2.01<br>5  | 0.52<br>7     | 7.69<br>9  | 0.298          | 2.14<br>6    | 0.52<br>6     | 8.762      | 0.278          |
| <b>H-HOMA</b>          | 1.36<br>1    | 0.82<br>1     | 2.258      | 0.232          | 1.00<br>9  | 0.49<br>6     | 2.05<br>4  | 0.981          | 2.08<br>3    | 0.98<br>2     | 4.418      | 0.052          |
| <b>H-Cholesterol</b>   | 0.85<br>5    | 0.44          | 1.661      | 0.643          | 0.48<br>1  | 0.17<br>7     | 1.30<br>6  | 0.144          | 1.73<br>9    | 0.66<br>5     | 4.551      | 0.256          |
| <b>H-Triglycerides</b> | 1.09<br>7    | 0.71<br>4     | 1.683      | 0.674          | 0.84<br>6  | 0.46<br>4     | 1.54<br>1  | 0.586          | 1.56         | 0.83<br>3     | 2.922      | 0.164          |
| <b>L-HDL</b>           | 1.22<br>9    | 0.85<br>8     | 1.76       | 0.26           | 1.11<br>1  | 0.62          | 1.98<br>9  | 0.725          | 1.25<br>8    | 0.78<br>1     | 2.028      | 0.347          |
| <b>H-LDL</b>           | 0.95         | 0.40<br>8     | 2.212      | 0.906          | 1.02<br>6  | 0.35          | 3.00<br>8  | 0.963          | 0.89<br>7    | 0.22<br>7     | 3.544      | 0.877          |
| <b>rs12188996</b>      |              |               |            |                |            |               |            |                |              |               |            |                |
|                        | <b>Total</b> |               |            |                | <b>Men</b> |               |            |                | <b>Women</b> |               |            |                |
|                        | <b>OR</b>    | <b>95% CI</b> |            | <b>p-value</b> | <b>OR</b>  | <b>95% CI</b> |            | <b>p-value</b> | <b>OR</b>    | <b>95% CI</b> |            | <b>p-value</b> |

|                        |              |               |                |           |               |                |            |               |                |           |               |                |
|------------------------|--------------|---------------|----------------|-----------|---------------|----------------|------------|---------------|----------------|-----------|---------------|----------------|
| <b>Clinical marker</b> | 0.57<br>4    | 0.11<br>8     | 2.792          | 0.487     | 0.46<br>1     | 0.05<br>1      | 4.18<br>5  | 0.483         | 0.72<br>8      | 0.07<br>5 | 7.088         | 0.784          |
| <b>H- Waist</b>        | 0.27<br>5    | 0.03<br>4     | 2.213          | 0.195     | 0.75          | 0.08<br>2      | 6.82<br>3  | 0.799         | 0.62<br>9      | 0.57<br>7 | 0.686         | 0.127          |
| <b>H-WHI</b>           | 0.38<br>8    | 0.08          | 1.881          | 0.224     | 0.48<br>6     | 0.08           | 2.95<br>2  | 0.425         | 0.71<br>9      | 0.67      | 0.771         | 0.213          |
| <b>H-WHR</b>           | 0.67         | 0.16<br>6     | 2.705          | 0.572     | 0.33<br>1     | 0.03<br>7      | 3.00<br>2  | 0.304         | 1.35<br>4      | 0.18<br>8 | 9.744         | 0.763          |
| <b>H-%BF</b>           | 0.78<br>3    | 0.17<br>4     | 3.53           | 0.75      | 0.30<br>5     | 0.03<br>1      | 2.96<br>9  | 0.281         | 2.36<br>1      | 0.21<br>2 | 26.32<br>7    | 0.474          |
| <b>H-Insulin</b>       | 0.73<br>9    | 0.08<br>8     | 6.229          | 0.781     | 0.76<br>4     | 0.70<br>7      | 0.82<br>6  | 0.339         | 2.08<br>9      | 0.21      | 20.74<br>6    | 0.523          |
| <b>H-Glucose</b>       | 0.97<br>1    | 0.95<br>7     | 0.985          | 0.605     | 0.96<br>8     | 0.94<br>8      | 0.98<br>9  | 0.686         | 0.97<br>4      | 0.95<br>6 | 0.992         | 0.744          |
| <b>H-HOMA</b>          | 0.76<br>7    | 0.09<br>5     | 6.218          | 0.803     | 1.15<br>9     | 0.12<br>6      | 10.6<br>23 | 0.897         | 0.89<br>2      | 0.85<br>7 | 0.929         | 0.489          |
| <b>H-Cholesterol</b>   | 1.50<br>3    | 0.18<br>4     | 12.28<br>4     | 0.703     | 0.9           | 0.86<br>6      | 0.93<br>6  | 0.459         | 5.64<br>7      | 0.55<br>7 | 57.20<br>1    | 0.1            |
| <b>H-Triglycerides</b> | 1.13<br>3    | 0.23<br>2     | 5.526          | 0.877     | 0.75<br>4     | 0.08<br>3      | 6.85<br>5  | 0.802         | 1.78<br>5      | 0.18<br>2 | 17.52         | 0.616          |
| <b>L-HDL</b>           | 0.88<br>9    | 0.22          | 3.59           | 0.861     | 0.73<br>9     | 0.08<br>1      | 6.72<br>5  | 0.789         | 1.17<br>9      | 0.16<br>4 | 8.475         | 0.871          |
| <b>H-LDL</b>           | 2.69<br>2    | 0.32<br>5     | 22.33<br>4     | 0.341     | 0.94          | 0.91<br>2      | 0.96<br>8  | 0.572         | 10.9<br>63     | 1.03<br>7 | 115.9<br>15   | 0.013          |
| <b>rs60258111</b>      |              |               |                |           |               |                |            |               |                |           |               |                |
|                        | <b>Total</b> |               |                |           | <b>Men</b>    |                |            | <b>Women</b>  |                |           |               |                |
| <b>Clinical marker</b> | <b>OR</b>    | <b>95% CI</b> | <b>p-value</b> | <b>OR</b> | <b>95% CI</b> | <b>p-value</b> | <b>OR</b>  | <b>95% CI</b> | <b>p-value</b> | <b>OR</b> | <b>95% CI</b> | <b>p-value</b> |
| <b>H-BMI</b>           | 1.22<br>2    | 0.28<br>9     | 5.169          | 0.785     | 5.74<br>7     | 0.59           | 56.0<br>07 | 0.09          | 0.68<br>4      | 0.63<br>3 | 0.739         | 0.176          |
| <b>H- Waist</b>        | 1.35<br>8    | 0.32<br>1     | 5.746          | 0.677     | 3.07<br>2     | 0.42<br>5      | 22.2<br>24 | 0.244         | 0.58<br>4      | 0.06      | 5.684         | 0.641          |
| <b>H-WHI</b>           | 0.81<br>1    | 0.19<br>2     | 3.427          | 0.776     | 2.20<br>4     | 0.22<br>6      | 21.4<br>48 | 0.487         | 0.71<br>7      | 0.66<br>7 | 0.77          | 0.211          |
| <b>H-WHR</b>           | 1.33<br>6    | 0.33<br>1     | 5.395          | 0.684     | 4.05<br>9     | 0.41<br>7      | 39.5<br>05 | 0.194         | 0.44           | 0.04<br>5 | 4.28          | 0.469          |
| <b>H-%BF</b>           | 0.84<br>1    | 0.22<br>4     | 3.166          | 0.799     | 2.78<br>6     | 0.28<br>6      | 27.1<br>19 | 0.359         | 0.29<br>6      | 0.03<br>3 | 2.679         | 0.252          |
| <b>H-Insulin</b>       | 1.47<br>8    | 0.15<br>2     | 14.40<br>5     | 0.736     | 1.65<br>6     | 0.14<br>7      | 18.6<br>83 | 0.682         | 0.85<br>8      | 0.81<br>3 | 0.906         | 0.686          |
| <b>H-Glucose</b>       | 0.97<br>1    | 0.95<br>7     | 0.985          | 0.604     | 0.96<br>8     | 0.94<br>8      | 0.98<br>9  | 0.713         | 0.97<br>4      | 0.95<br>6 | 0.992         | 0.718          |
| <b>H-HOMA</b>          | 0.85<br>7    | 0.82<br>8     | 0.888          | 0.233     | 0.81<br>9     | 0.77<br>3      | 0.86<br>8  | 0.35          | 0.89<br>1      | 0.85<br>5 | 0.928         | 0.436          |
| <b>H-Cholesterol</b>   | 3.42<br>2    | 0.69<br>1     | 16.96<br>1     | 0.11      | 3.02<br>4     | 0.30<br>4      | 30.0<br>57 | 0.323         | 4.19<br>1      | 0.44<br>4 | 39.57<br>7    | 0.176          |
| <b>H-Triglycerides</b> | 0.47<br>8    | 0.05<br>9     | 3.861          | 0.48      | 0.99<br>1     | 0.10<br>1      | 9.67<br>6  | 0.994         | 0.83<br>4      | 0.79<br>4 | 0.877         | 0.322          |
| <b>L-HDL</b>           | 0.89         | 0.22          | 3.597          | 0.871     | 0.74<br>5     | 0.69<br>5      | 0.79<br>7  | 0.244         | 1.78<br>3      | 0.29<br>4 | 10.82<br>2    | 0.526          |
| <b>H-LDL</b>           | 2.68<br>3    | 0.32<br>3     | 22.25<br>4     | 0.342     | 0.94          | 0.91<br>2      | 0.96<br>8  | 0.614         | 8.13<br>9      | 0.82<br>5 | 80.33         | 0.034          |
| <b>rs16878426</b>      |              |               |                |           |               |                |            |               |                |           |               |                |
|                        | <b>Total</b> |               |                |           | <b>Men</b>    |                |            | <b>Women</b>  |                |           |               |                |

| Clinical marker   | OR           | 95% CI    | <i>p</i> -value | OR    | 95% CI     | <i>p</i> -value | OR        | 95% CI | <i>p</i> -value |               |            |       |
|-------------------|--------------|-----------|-----------------|-------|------------|-----------------|-----------|--------|-----------------|---------------|------------|-------|
| H-BMI             | 0.66<br>1    | 0.62<br>4 | 0.701           | 0.018 | 0.64<br>1  | 0.58<br>7       | 0.7       | 0.069  | 0.68<br>9       | 0.62<br>0.735 | 0.127      |       |
| H- Waist          | 0.21<br>9    | 0.02<br>8 | 1.72            | 0.113 | 0.74<br>6  | 0.69<br>7       | 0.79<br>9 | 0.156  | 0.42<br>6       | 0.04<br>7     | 3.862      | 0.437 |
| H-WHI             | 0.77<br>7    | 0.22<br>5 | 2.685           | 0.69  | 0.72<br>8  | 0.14<br>4       | 3.67<br>3 | 0.701  | 0.64<br>1       | 0.07<br>1     | 5.819      | 0.692 |
| H-WHR             | 0.56<br>3    | 0.51      | 0.622           | 0.004 | 0.55<br>9  | 0.50<br>4       | 0.62<br>1 | 0.031  | 0.56<br>3       | 0.51          | 0.622      | 0.051 |
| H-%BF             | 0.38<br>2    | 0.1       | 1.454           | 0.144 | 0.44<br>7  | 0.08<br>1       | 2.48<br>3 | 0.347  | 0.28<br>7       | 0.03<br>2     | 2.599      | 0.239 |
| H-Insulin         | 0.55<br>4    | 0.06<br>8 | 4.498           | 0.576 | 0.76<br>2  | 0.70<br>4       | 0.82<br>4 | 0.215  | 2.11<br>1       | 0.21<br>3     | 20.96<br>6 | 0.516 |
| H-Glucose         | 0.97<br>1    | 0.95<br>8 | 0.985           | 0.568 | 0.96<br>8  | 0.94<br>8       | 0.98<br>9 | 0.657  | 0.97<br>4       | 0.95<br>6     | 0.992      | 0.715 |
| H-HOMA            | 0.77<br>2    | 0.09<br>5 | 6.258           | 0.808 | 0.81<br>9  | 0.77<br>3       | 0.86<br>8 | 0.297  | 2.87<br>8       | 0.29          | 28.54<br>7 |       |
| H-Cholesterol     | 0.92         | 0.89<br>8 | 0.942           | 0.329 | 0.89<br>7  | 0.86<br>2       | 0.93<br>3 | 0.408  | 0.94<br>1       | 0.91<br>5     | 0.968      | 0.347 |
| H-Triglycerides   | 0.86<br>5    | 0.18<br>4 | 4.055           | 0.854 | 0.74<br>4  | 0.69<br>4       | 0.79<br>7 | 0.153  | 3.58<br>3       | 0.58<br>3     | 22.01<br>7 | 0.143 |
| L-HDL             | 1.01<br>1    | 0.29<br>3 | 3.493           | 0.987 | 0.74<br>4  | 0.69<br>4       | 0.79<br>7 | 0.153  | 4.74<br>3       | 0.52<br>4     | 42.92<br>5 | 0.128 |
| H-LDL             | 0.95<br>4    | 0.93<br>7 | 0.971           | 0.467 | 0.94       | 0.91<br>2       | 0.96<br>8 | 0.536  | 0.96<br>7       | 0.94<br>8     | 0.987      | 0.682 |
| <b>rs6872863</b>  |              |           |                 |       |            |                 |           |        |                 |               |            |       |
|                   | <b>Total</b> |           |                 |       | <b>Men</b> |                 |           |        | <b>Women</b>    |               |            |       |
| Clinical marker   | OR           | 95% CI    | <i>p</i> -value | OR    | 95% CI     | <i>p</i> -value | OR        | 95% CI | <i>p</i> -value |               |            |       |
| H-BMI             | 1.21<br>2    | 0.83<br>9 | 1.75            | 0.306 | 1.11<br>5  | 0.66<br>1       | 1.88<br>1 | 0.685  | 1.3<br>5        | 0.77<br>2.18  | 0.321      |       |
| H- Waist          | 1.06<br>8    | 0.74      | 1.541           | 0.726 | 1.11<br>4  | 0.62<br>5       | 1.98<br>3 | 0.716  | 1.08<br>6       | 0.67          | 1.761      | 0.739 |
| H-WHI             | 1.09<br>4    | 0.77<br>7 | 1.541           | 0.606 | 1.41<br>4  | 0.86            | 2.32<br>4 | 0.173  | 0.74<br>8       | 0.44<br>9     | 1.246      | 0.265 |
| H-WHR             | 1.22<br>6    | 0.86<br>8 | 1.731           | 0.247 | 1.17<br>1  | 0.70<br>9       | 1.93<br>2 | 0.539  | 1.27<br>9       | 0.79<br>4     | 2.06       | 0.313 |
| H-%BF             | 1.30<br>2    | 0.92<br>2 | 1.839           | 0.134 | 1.38<br>7  | 0.83<br>9       | 2.29<br>1 | 0.203  | 1.20<br>9       | 0.75<br>1     | 1.948      | 0.436 |
| H-Insulin         | 0.88<br>6    | 0.53      | 1.484           | 0.647 | 0.80<br>6  | 0.40<br>1       | 1.62      | 0.547  | 0.90<br>8       | 0.41<br>6     | 1.982      | 0.81  |
| H-Glucose         | 1.19         | 0.40<br>8 | 3.473           | 0.75  | 0.59<br>5  | 0.15<br>6       | 2.27      | 0.445  | 3.63<br>8       | 0.43<br>2     | 30.60<br>8 | 0.205 |
| H-HOMA            | 1.11<br>4    | 0.66<br>6 | 1.864           | 0.682 | 1.23<br>1  | 0.60<br>8       | 2.49<br>2 | 0.565  | 0.92<br>7       | 0.43<br>1     | 1.992      | 0.846 |
| H-Cholesterol     | 0.82<br>5    | 0.44<br>5 | 1.53            | 0.543 | 0.91<br>2  | 0.40<br>6       | 2.04<br>7 | 0.824  | 0.65<br>1       | 0.24<br>4     | 1.737      | 0.389 |
| H-Triglycerides   | 0.72<br>5    | 0.48<br>2 | 1.09            | 0.121 | 0.63<br>8  | 0.36<br>7       | 1.11      | 0.111  | 0.78<br>7       | 0.42<br>5     | 1.457      | 0.446 |
| L-HDL             | 0.95<br>7    | 0.67<br>5 | 1.357           | 0.805 | 0.74<br>9  | 0.42<br>9       | 1.30<br>9 | 0.311  | 1.22<br>2       | 0.76<br>8     | 1.943      | 0.398 |
| H-LDL             | 0.48<br>3    | 0.22<br>3 | 1.048           | 0.061 | 0.40<br>6  | 0.15<br>1       | 1.08<br>9 | 0.066  | 0.58<br>2       | 0.16<br>5     | 2.055      | 0.397 |
| <b>rs76641655</b> |              |           |                 |       |            |                 |           |        |                 |               |            |       |

| Clinical marker    | Total |        |                 |       | Men    |                 |        | Women  |                 |       |        |                 |
|--------------------|-------|--------|-----------------|-------|--------|-----------------|--------|--------|-----------------|-------|--------|-----------------|
|                    | OR    | 95% CI | <i>p</i> -value | OR    | 95% CI | <i>p</i> -value | OR     | 95% CI | <i>p</i> -value | OR    | 95% CI | <i>p</i> -value |
| H-BMI              | 1.008 | 0.373  | 2.728           | 0.988 | 0.927  | 0.227           | 3.79   | 0.916  | 1.092           | 0.267 | 4.464  | 0.902           |
| H- Waist           | 0.63  | 0.205  | 1.941           | 0.418 | 0.371  | 0.046           | 3.022  | 0.337  | 0.859           | 0.211 | 3.504  | 0.833           |
| H-WHI              | 0.514 | 0.181  | 1.46            | 0.204 | 0.908  | 0.239           | 3.456  | 0.888  | 0.712           | 0.663 | 0.766  | 0.058           |
| H-WHR              | 0.84  | 0.321  | 2.198           | 0.722 | 0.654  | 0.16            | 2.669  | 0.553  | 1.065           | 0.28  | 4.044  | 0.927           |
| H-%BF              | 0.826 | 0.321  | 2.125           | 0.693 | 0.726  | 0.191           | 2.762  | 0.638  | 0.933           | 0.246 | 3.547  | 0.92            |
| H-Insulin          | 0.29  | 0.038  | 2.232           | 0.207 | 0.403  | 0.049           | 3.308  | 0.385  | 0.857           | 0.812 | 0.905  | 0.283           |
| H-Glucose          | 2.077 | 0.26   | 16.579          | 0.482 | 0.968  | 0.947           | 0.989  | 0.586  | 5.268           | 0.578 | 48.013 | 0.101           |
| H-HOMA             | 0.38  | 0.05   | 2.908           | 0.334 | 0.574  | 0.076           | 4.706  | 0.602  | 0.891           | 0.856 | 0.928  | 0.326           |
| H-Cholesterol      | 0.684 | 0.089  | 5.257           | 0.714 | 1.121  | 0.135           | 9.291  | 0.916  | 0.94            | 0.914 | 0.967  | 0.452           |
| H-Triglycerides    | 2.579 | 0.978  | 6.798           | 0.048 | 1.522  | 0.371           | 6.248  | 0.559  | 4.452           | 1.152 | 17.204 | 0.019           |
| L-HDL              | 1.435 | 0.558  | 3.691           | 0.453 | 1.522  | 0.371           | 6.248  | 0.559  | 1.466           | 0.386 | 5.565  | 0.574           |
| H-LDL              | 0.954 | 0.937  | 0.971           | 0.35  | 0.939  | 0.911           | 0.968  | 0.447  | 0.967           | 0.947 | 0.987  | 0.58            |
| <b>rs114011218</b> |       |        |                 |       |        |                 |        |        |                 |       |        |                 |
| Clinical marker    | Total |        |                 |       | Men    |                 |        | Women  |                 |       |        |                 |
|                    | OR    | 95% CI | <i>p</i> -value | OR    | 95% CI | <i>p</i> -value | OR     | 95% CI | <i>p</i> -value | OR    | 95% CI | <i>p</i> -value |
| H-BMI              | 0.179 | 0.023  | 1.393           | 0.065 | 0.641  | 0.587           | 0.7    | 0.069  | 0.43            | 0.05  | 3.73   | 0.432           |
| H- Waist           | 0.663 | 0.18   | 2.438           | 0.534 | 1.529  | 0.274           | 8.53   | 0.627  | 0.281           | 0.033 | 2.366  | 0.215           |
| H-WHI              | 0.403 | 0.11   | 1.479           | 0.157 | 0.728  | 0.144           | 3.673  | 0.701  | 0.714           | 0.665 | 0.767  | 0.096           |
| H-WHR              | 0.823 | 0.266  | 2.547           | 0.736 | 0.653  | 0.118           | 3.624  | 0.625  | 0.996           | 0.219 | 4.529  | 0.996           |
| H-%BF              | 0.686 | 0.192  | 2.457           | 0.561 | 0.601  | 0.099           | 3.654  | 0.578  | 0.776           | 0.128 | 4.714  | 0.783           |
| H-Insulin          | 0.563 | 0.069  | 4.572           | 0.587 | 0.768  | 0.711           | 0.83   | 0.275  | 1.575           | 0.17  | 14.573 | 0.688           |
| H-Glucose          | 0.971 | 0.957  | 0.985           | 0.534 | 0.968  | 0.948           | 0.989  | 0.657  | 0.974           | 0.956 | 0.992  | 0.665           |
| H-HOMA             | 0.566 | 0.072  | 4.451           | 0.585 | 1.198  | 0.131           | 10.981 | 0.874  | 0.892           | 0.856 | 0.928  | 0.359           |
| H-Cholesterol      | 0.976 | 0.124  | 7.677           | 0.982 | 0.897  | 0.862           | 0.933  | 0.408  | 2.814           | 0.32  | 24.712 | 0.332           |
| H-Triglycerides    | 1.175 | 0.318  | 4.336           | 0.809 | 0.592  | 0.068           | 5.149  | 0.632  | 2.133           | 0.402 | 11.316 | 0.364           |
| L-HDL              | 1.116 | 0.361  | 3.455           | 0.849 | 0.747  | 0.698           | 0.8    | 0.157  | 2.968           | 0.567 | 15.534 | 0.179           |
| H-LDL              | 1.792 | 0.224  | 14.306          | 0.578 | 0.94   | 0.912           | 0.968  | 0.536  | 5.463           | 0.594 | 50.222 | 0.094           |

| rs115159664     |           |           |            |                 |           |           |            |                 |           |           |            |                 |
|-----------------|-----------|-----------|------------|-----------------|-----------|-----------|------------|-----------------|-----------|-----------|------------|-----------------|
| Clinical marker | Total     |           |            |                 | Men       |           |            | Women           |           |           |            |                 |
|                 | OR        | 95% CI    |            | <i>p</i> -value | OR        | 95% CI    |            | <i>p</i> -value | OR        | 95% CI    |            | <i>p</i> -value |
| H-BMI           | 0.62      | 0.22<br>4 | 1.718      | 0.355           | 0.45<br>4 | 0.09<br>4 | 2.17<br>9  | 0.314           | 0.81<br>1 | 0.21      | 3.128      | 0.762           |
| H- Waist        | 0.89      | 0.34      | 2.331      | 0.813           | 0.32<br>9 | 0.04<br>1 | 2.64       | 0.273           | 1.45<br>8 | 0.43<br>5 | 4.891      | 0.541           |
| H-WHI           | 0.83<br>2 | 0.34      | 2.039      | 0.688           | 0.47<br>3 | 0.13<br>1 | 1.71<br>5  | 0.246           | 1.49<br>8 | 0.42<br>7 | 5.253      | 0.527           |
| H-WHR           | 0.65<br>4 | 0.26      | 1.644      | 0.364           | 0.32      | 0.06<br>7 | 1.53<br>6  | 0.136           | 1.11<br>1 | 0.33<br>2 | 3.723      | 0.865           |
| H-%BF           | 0.68<br>4 | 0.27<br>5 | 1.699      | 0.411           | 0.10<br>8 | 0.01<br>3 | 0.87<br>9  | 0.012           | 2.10<br>3 | 0.60<br>2 | 7.343      | 0.236           |
| H-Insulin       | 1.23<br>5 | 0.33<br>6 | 4.536      | 0.751           | 0.46<br>3 | 0.05<br>6 | 3.86<br>8  | 0.47            | 3.25<br>9 | 0.57<br>1 | 18.59<br>9 | 0.162           |
| H-Glucose       | 1.75<br>6 | 0.22<br>2 | 13.90<br>3 | 0.59            | 0.96<br>8 | 0.94<br>7 | 0.98<br>9  | 0.565           | 4.18<br>6 | 0.46<br>9 | 37.32<br>7 | 0.165           |
| H-HOMA          | 0.64<br>4 | 0.14<br>7 | 2.824      | 0.558           | 0.81<br>6 | 0.76<br>9 | 0.86<br>6  | 0.136           | 1.93<br>9 | 0.39<br>9 | 9.409      | 0.405           |
| H-Cholesterol   | 2.92<br>7 | 0.94<br>3 | 9.086      | 0.052           | 0.99<br>2 | 0.12<br>1 | 8.12<br>2  | 0.994           | 7.12<br>5 | 1.71<br>4 | 29.62<br>1 | 0.002           |
| H-Triglycerides | 0.40<br>2 | 0.09<br>2 | 1.749      | 0.21            | 0.74<br>1 | 0.69<br>1 | 0.79<br>4  | 0.063           | 1.16<br>7 | 0.24<br>4 | 5.568      | 0.847           |
| L-HDL           | 0.70<br>1 | 0.26<br>8 | 1.834      | 0.468           | 2.05<br>9 | 0.56<br>4 | 7.51<br>2  | 0.266           | 0.24<br>7 | 0.05<br>3 | 1.164      | 0.057           |
| H-LDL           | 3.84<br>7 | 1.06      | 13.95<br>9 | 0.028           | 1.81<br>9 | 0.21<br>7 | 15.2<br>61 | 0.577           | 8.11<br>1 | 1.50<br>3 | 43.76      | 0.004           |

  

| rs4700398       |           |           |       |                 |           |           |           |                 |           |           |       |                 |
|-----------------|-----------|-----------|-------|-----------------|-----------|-----------|-----------|-----------------|-----------|-----------|-------|-----------------|
| Clinical marker | Total     |           |       |                 | Men       |           |           | Women           |           |           |       |                 |
|                 | OR        | 95% CI    |       | <i>p</i> -value | OR        | 95% CI    |           | <i>p</i> -value | OR        | 95% CI    |       | <i>p</i> -value |
| H-BMI           | 1.57      | 1.10<br>9 | 2.221 | 0.011           | 1.27<br>2 | 0.77<br>9 | 2.07<br>8 | 0.337           | 1.96<br>4 | 1.19<br>6 | 3.225 | 0.007           |
| H- Waist        | 1.29<br>9 | 0.91<br>6 | 1.841 | 0.142           | 1.24<br>1 | 0.72<br>5 | 2.12<br>4 | 0.433           | 1.31<br>5 | 0.82<br>5 | 2.094 | 0.25            |
| H-WHI           | 0.98<br>5 | 0.71      | 1.365 | 0.926           | 1.15<br>3 | 0.72      | 1.84<br>8 | 0.555           | 0.89<br>5 | 0.54<br>3 | 1.473 | 0.663           |
| H-WHR           | 1.43<br>8 | 1.03<br>6 | 1.996 | 0.03            | 1.35<br>8 | 0.84<br>7 | 2.17<br>7 | 0.204           | 1.51<br>7 | 0.96      | 2.396 | 0.074           |
| H-%BF           | 1.47<br>3 | 1.05<br>8 | 2.051 | 0.022           | 1.44<br>1 | 0.89<br>4 | 2.32<br>3 | 0.134           | 1.52<br>2 | 0.95<br>9 | 2.415 | 0.074           |
| H-Insulin       | 1.06      | 0.64<br>5 | 1.742 | 0.819           | 0.89<br>8 | 0.46<br>1 | 1.74<br>9 | 0.754           | 1.32      | 0.61<br>6 | 2.828 | 0.477           |
| H-Glucose       | 0.75      | 0.28<br>2 | 1.998 | 0.565           | 0.55<br>7 | 0.13<br>7 | 2.27<br>3 | 0.411           | 1.03<br>4 | 0.25<br>4 | 4.21  | 0.963           |
| H-HOMA          | 1.2       | 0.73<br>9 | 1.95  | 0.462           | 0.98<br>2 | 0.51<br>5 | 1.87<br>4 | 0.957           | 1.65<br>8 | 0.77<br>4 | 3.554 | 0.192           |
| H-Cholesterol   | 1.08<br>7 | 0.59<br>6 | 1.985 | 0.785           | 1.24<br>2 | 0.57<br>6 | 2.68      | 0.589           | 0.91<br>4 | 0.34<br>3 | 2.433 | 0.857           |
| H-Triglycerides | 1.03<br>5 | 0.69<br>4 | 1.544 | 0.865           | 1.22<br>8 | 0.71<br>8 | 2.10<br>1 | 0.455           | 0.85<br>8 | 0.46<br>8 | 1.575 | 0.623           |
| L-HDL           | 1.00<br>4 | 0.71<br>8 | 1.404 | 0.981           | 0.78<br>1 | 0.45<br>4 | 1.34<br>2 | 0.372           | 1.14<br>8 | 0.73<br>4 | 1.797 | 0.546           |

|              |           |           |       |       |           |           |           |       |           |           |       |       |
|--------------|-----------|-----------|-------|-------|-----------|-----------|-----------|-------|-----------|-----------|-------|-------|
| <b>H-LDL</b> | 1.00<br>3 | 0.46<br>3 | 2.173 | 0.993 | 1.00<br>9 | 0.37<br>8 | 2.69<br>3 | 0.986 | 1.03<br>4 | 0.29<br>3 | 3.646 | 0.959 |
|--------------|-----------|-----------|-------|-------|-----------|-----------|-----------|-------|-----------|-----------|-------|-------|

H-BMI: High Body Mass Index >25.0 kg/m<sup>2</sup>; H-WC: High Waist circumference (Women >0.80 cm and Men >90 cm); H-WHI: High Waist-Hip Index (Women >0.85 cm and Men >95 cm); H-WHR: High Waist-Height Ratio >0.50; H-%BF: High Body Fat percent (Women >35% and Men >20%). H-Glucose: High glucose; > 100 mg/dL; H-INS: High Insulin (>14 μU/ml for women and > 11μU/ml for men); H-HOMA: High HOMA index (>2.9 for women and >2.3 for men); H-Cholesterol: High total cholesterol (>200 mg/dL); H-LDL: Elevated low-density lipoproteins (>130 mg/dL); L-HDL: Low high-density lipoproteins (≤50 mg/dL for women and ≤40 mg/dL for men); H-Triglycerides : High triglycerides (>150 mg/dL). The statistical analysis applied to this dataset was a multinomial regression (p=<0.05).
